# Supplementary material for: Reconstruction of proto-vertebrate, proto-cyclostome and proto-gnathostome genomes provides new insights into early vertebrate evolution
Source: PubMed Central journal article supplement (PMC8302630; doi:10.1038/s41467-021-24573-z), 2021-07-23
Supplement: 41467_2021_24573_MOESM2_ESM.pdf [file 41467_2021_24573_MOESM2_ESM.pdf]

## Reviewers' Comments:

### Reviewer #1:

#### Remarks to the Author:

I am happy to recommend that this article be published by Nature Communications as soon as my comments and recommendations, as detailed below and in the attached document, are addressed. I don't think that the study requires additional analyses and I am confident that the methods are appropriate and sufficient, based on my review as well as previous highly-regarded publications by Nakatani and co-authors, as well as Venkatesh and co-authors.

The application of the modified probabilistic macrosynteny model to the question of cyclostome-gnathostome divergence relative to the vertebrate tetraploidizations is especially exciting, as this method has proven its usefulness in previous publications by Nakatani and co-authors. In addition, the sequencing and chromosome-level assembly of a lamprey genome and an elephant shark genome will undoubtedly be useful resources for molecular evolutionary studies in vertebrates and vertebrate genomics. These species hold key taxonomic positions that have previously been under-addressed due to the lack of high-quality genomic resources. Congratulations on a fantastic paper!

However, some methods and procedures are not described clearly, which made some aspects of the analyses difficult to review. I also have some concerns about the conclusion that the cyclostome lineage underwent a hexaploidization event. This is a very novel suggestion, and I want to make sure that the authors have done everything possible to explain their method clearly, so that no serious doubts can be brought forward about the conclusion.

My general comments and suggestions are included below, and more detailed comments have been attached in a separate document.

#### General comments:

- Will the new genome assemblies be shared as part of any of the commonly used public genome browsers? Is the *Lethenteron camtschaticum* genome assembly, LetJap1.0, the same that has already been shared through NCBI: [https://www.ncbi.nlm.nih.gov/assembly/GCA\\_000466285.1](https://www.ncbi.nlm.nih.gov/assembly/GCA_000466285.1)? The submitter of LetJap1.0 matches the home institution of several of the co-authors. If so, the authors should mention in the paper that the genome assembly has been shared, and direct the reader towards the online databases. If a newer assembly has been made, this should be shared in the same way. The BioProject entries for the new genomes mentioned in the paper are not active yet, so I couldn't check them; but presumably these will only include the raw data, not the assembled genomes. Sharing the genome assemblies in an easily browsable/searchable way is crucial.

- The figure legends are inordinately long. Please make sure to only include information relevant for the graphical interpretation of the figure. As they are now, the figure legends include lengthy descriptions of the methodology and descriptions of results. This should not be included in a figure legend. Otherwise, it may look like the authors are not confident that their text is good enough for the reader to understand the figures. Or, perhaps more cynically, that the authors ran out of words in the main text of the paper and are smuggling some of the text into the paper via the figure legends. They can do better. I have suggested some changes in my detailed comments (attached).

- Another smaller issue is the nomenclature of the Japanese or Arctic lamprey, *Lethenteron japonicum* alt. *Lethenteron camtschaticum*. According to the World Register of Marine Species, *L. japonicum* (Martens, 1868) is an unaccepted synonym. Source: <http://www.marinespecies.org/aphia.php?p=taxdetails&id=298380>. The accepted name is *L. camtschaticum* (Tilesius, 1811). Source: <http://www.marinespecies.org/aphia.php?p=taxdetails&id=101173>. This is also the case in the FishBase database (<https://www.fishbase.se/summary/Lethenteron-camtschaticum.html>) and in the

NCBI taxonomy browser (<https://www.ncbi.nlm.nih.gov/Taxonomy/Browser/wwwtax.cgi?id=980415>). Please change all references to the binomial name of this species throughout the manuscript to reflect the accepted nomenclature. At the first reference to the species, on page 4, the common synonym *L. japonicum* should be mentioned. But it's not the accepted name. It's all right if the authors use "Japanese lamprey" as the common name throughout the paper, as long as *L. camtschaticum* is used and the other common name "Arctic lamprey" is mentioned at the first mention of the species.

- The authors consistently mention 18 proto-vertebrate chromosomes throughout the paper. There are several issues with this. 1) These are reconstructed chromosomes, so they are a purely theoretical conjecture about the karyotype of the proto-vertebrate. I understand that it would be cumbersome to clarify this each and every time they are mentioned, and simply writing "chromosome" is a good shorthand, but the authors should be absolutely clear, at crucial points of the text, that these are theoretical constructions. 2) The reconstruction of the "PvcUn" chromosome is a bit more problematic. It seems to consist of a relatively large number of small fragments that could not be assigned to any other of the proto-vertebrate chromosome reconstructions. It is likely that these fragments correspond to other proto-chromosomes and that there is no 18th proto-vertebrate chromosome. Indeed, in comparing their results to those of Sacerdot et al. (2018), PvcUn seems to match Pvc17 (Table S8). The authors should make this clear in the main text, not only the supplementary text. 3) Thus, I suggest that the authors refer to 17 proto-vertebrate chromosomes, not 18, and when necessary refer to "PvcUn" as separate from the set. For example, on page 6, lines 4-5 - I suggest "Our reconstruction of the proto-vertebrate genome comprises 17 ancestral chromosomes, designated as Pvc1-17, as well as PvcUn, which consists of weak macrosynteny segments that could not be assigned to Pvc1-17." Please make sure that this is carried through for the whole text. Regarding the analysis matching PvcUn to scallop chromosome 13 as an argument for PvcUn representing a "true" ancestral chromosome, see my comment for page 23, line 18, in the attached document.

- I have some concerns about the description of the analyses of the proto-cyclostome genome reconstruction, and how the authors arrived at a hexaploidization scenario. My main issue is that these analyses have not been described well enough for me to make a judgment of whether the conclusions seem correct or not. For example, Jeremiah Smith and co-authors have suggested the involvement of a series of segmental duplications in the cyclostome lineage. How did the authors distinguish between genome hexaploidization and genome tetraploidization + segmental duplications? Simply calculating the "multiplicity" of genes would not address this. I have detailed some other concerns in the detailed comments (attached document) for pages 6-8 as well as for the supplements.

- In general, I miss a discussion of alternative scenarios in the paper. The authors mention alternative scenarios proposed by other previous papers like Mehta et al. (2013), Smith & Keinath (2015), Smith et al. (2018) and Sacerdot et al (2018), but I miss a discussion regarding whether any of these alternative scenarios could be possible with another interpretation of the results presented in the paper. In other words, can the authors definitely disprove any of the previous alternative scenarios? It would be helpful to the reader if the authors could discuss at least the one most likely alternative scenario. Why isn't a shared 1R/2R at the base of vertebrates followed by independent fissions/segmentations a likely scenario, for example? Something like this has been proposed by Jeremiah Smith and co-authors, based on the meiotic map of the previous sea lamprey genome assembly, and more recently based on synteny conservation of the latest sea lamprey germline genome. I concede that Smith and co-authors have gone back-and-forth and suggested partly contradictory scenarios, but it seems to boil down to one shared WGD together with chromosome-level segment duplications and fissions, possibly both preceding and following the WGD. Based on the current results presented in the present paper, why are these alternative scenarios less likely?

- Smith et al. (2018) also have the great advantage of dealing with the germline genome of the sea lamprey. As is well-known, lampreys greatly modify their genomes in the mature somatic cells, losing upwards of 20% of the genomic DNA. The authors describe that the DNA for the Japanese lamprey genome assembly was extracted from the mature testis (page 4 of supplementary information), while

Smith et al. (2018) specify that germline DNA was extracted from sperm cells of sea lamprey. I'm not entirely familiar with the methods for SMRT sequencing, but how confident are you that your Japanese lamprey genome assembly reflects the germline genome?

- I also have concerns regarding the annotation of orthologs vs. paralogs. The method is ingenious, although it has some limitations, and the principles behind it make sense. However, there are many pitfalls related to the fact that it is easy to misidentify orthology and paralogy with automatic annotations and gene trees, and with reciprocal BLASTP searches. I would want to make sure that these pitfalls have been avoided to the utmost extent. I would like the authors to describe the methods, the procedures, and the datasets in clearer detail in the supplementary information. As it is right now it would be nigh impossible for anyone to reproduce these analyses. See my comment in the attached document regarding page 18 of the supplementary information.

- The authors consistently write about implications for human disease, however, I cannot identify anything in the study that would further our understanding of the molecular/genetic mechanisms of disease, disease progression, treatment, etc, which is what is clearly implied by centering on human disease. Genetic diseases may reveal some constraints on genome evolution, which the authors discuss in a relevant way. But from this, there is a big step to talking about "implications for human disease". This reference to human disease must be tempered and put into the right context in the revised manuscript. Otherwise, this just looks like a transparent attempt to drive up the significance of the study by linking it to human disease. Surely the readers of Nature Communications can see through this, and I certainly don't think it was the author's intention.

- Finally, my spell checker kept changing "proto" to "photo", "port" or "protocol". I think I have identified the majority of these mistakes, but if there is a "photo-vertebrate" chromosome here and there in my responses, please overlook it.

It was a lot of work going through this manuscript in the detail that it deserves, but it was a pleasure to take part in these results before they are released. I apologize if my ignorance of some specific topics made me ask for a lot of clarification, but think of readers like myself who will benefit from this study without necessarily being experts in the intricacies of ancient genome reconstruction and macrosynteny algorithms.

I wish my colleagues all the best in the publication of this paper and I'm excited for it to come out.

Signed: Daniel Ocampo Daza  
University of Uppsala, Department of Organismal Biology  
University of California Merced, School of Natural Sciences

**Specific comments for manuscript NCOMMS-19-37344-T - “Reconstruction of proto-vertebrate, proto-cyclostome and proto-gnathostome genomes provides new insights into early vertebrate evolution” by Nakatani et al.**

Page 2, line 1: Is it necessary to center humans in this conversation? We are after all a very small part of this story. I suggest “The genomes of vertebrates, including humans, have been shaped by...”

Page 2, line 2: I suggest starting a new sentence at “... tetraploidization events. These have had a lasting impact...”

Page 2, line 3: Strike “However,”

Page 2, line 6: The authors suggest that the lack of a proto-cyclostome genome reconstruction has been a limitation in sorting out the timing of the cyclostome-gnathostome divergence relative to the early vertebrate tetraploidizations. The proto-cyclostome genome reconstruction is undoubtedly a great tool to resolve this issue, but the limitations truly lie with the lack of a reliable, mapped, cyclostome genome as well as the unique composition of cyclostome genomes and sequences. The authors discuss these issues in the manuscript. Can the statement in the abstract be tempered to reflect this? I suggest that this sentence can be removed completely without affecting the abstract.

Page 2, line 11-15: I suggest something like “**Our model suggests that** cyclostomes diverged from **the lineage leading to** gnathostomes after a shared tetraploidization...” In this same long sentence I suggest the following grammatical review - “; **that** the cyclostome lineage experienced...” “; **that** 2R in the gnathostome lineage **was an** allotetraploidization **event**...” “; and **that subsequently**, biased gene loss **from one of the** subgenomes...”

Page 2, line 13: It’s a tautology to write “the **cyclostome** lineage experienced a **cyclostome**-specific hexaploidization”.

Page 2, last sentence of Abstract: Again, this centers humans a bit too much in the story. The authors do mention the possibility of their findings informing our knowledge of human disease genes (I have some additional comments about this below), but because the authors have not identified any specific disease genes, not used any specific human disease genes as examples in this study, I think it is misleading to mention human disease genes in the abstract.

Page 3, line 2. The word “simple” can be removed. This is a common pitfall when writing about evolution. “Simple” in relation to what? Surely even these early chordates had some measure of complexity?

Page 3, line 4: Add comma - “... species, including humans.”

Page 3, line 9: Change to “Osteichthyes, represented by ray-finned fishes and lobe-finned fishes, including tetrapods”. The clade of lobe-finned fishes (Sarcopterygii) includes tetrapods, it’s not separate from it.

Page 3, line 10: I'm not sure that this opinion of cyclostomes is so general any more. Perhaps this could be changed to "Cyclostomes are **sometimes** thought to be..."

Page 3, line 13: I suggest "**seemingly** degenerate".

Page 3, line 15: Start a new sentence at "**F**or example,".

Page 3, lines 20-22: This sentence ("Evolutionary innovations...") is very long and tricky to follow. Please break up and clarify.

Page 3, lines 22-23: "This view is now widely accepted" seems to refer to the duplication followed by sub/neo-functionalization scenario, and not to the tetraploidizations themselves, which I think is the point. Please clarify.

Page 4, lines 7-8: Isn't "the tendency of lamprey ohnologs to cluster outside gnathostome gene clades" what is to be expected, i.e. isn't this the position that follows the taxonomy correctly? I know what the authors mean - that cyclostome sequences tend to occupy "paradoxical" positions in gene trees, but surely the position that the authors have described as "paradoxical" is the expected one?

Page 4, line 26: It's misleading to describe the species themselves as "early branching vertebrates". At least the lamprey is a **representative** of an early branching vertebrate lineage, but the cartilaginous fishes are just as "early" as the bony fishes, so this description is incorrect. Please clarify that the two species whose genomes have been sequenced and assembled **represent** two crucial divergence points in the evolution of vertebrates.

Page 4, lines 29-32: This sentence ("The major advantage...") is very long and tricky to follow. Please break up and clarify.

Page 4, line 33: Syntax error - "... we were able to reconstruct **the** first **the** proto-cyclostome genome..."

Page 5, lines 1-2: The statement "In addition, our reconstruction of the proto-gnathostome genome..." comes a bit prematurely. The authors have not yet stated that it was an aim to do this reconstruction, as they stated with the proto-cyclostome genome reconstruction on the previous page. I suggest "In addition, **we reconstructed** the proto-gnathostome genome **using the same strategy, with a higher coverage of extant gnathostome genomes than previous reconstructions...**" The authors have also neglected to mention that their sequencing and assembly of a new elephant shark genome was crucially integrated into this reconstruction. Highlight this fact - it's one of the major advances described in this paper! Similarly, the authors could highlight how crucial a chromosome-level assembly of a lamprey genome, compared with previous lamprey genome assemblies, was to their reconstruction.

Page 5, lines 7-8: The authors write that they "provide new insights into the genetic basis underlying evolutionary innovations". This is an overstatement. Surely, this is a possible future

impact of this study, but as for the present paper there is only a brief and very general discussion about the evolution of the adaptive immune system. That's it. Please temper the tone of this statement to something that reflects the content of this paper more truthfully.

Page 5, lines 8-9: This statement is only true if the authors will share the new genome assemblies in an easily searchable or browsable form, or, even better, share a detailed searchable map of their reconstructions. These possibilities are not mentioned at all in the paper. If the authors do not plan to share these resources, then the reconstructions will not serve as references of any kind.

Page 5, lines 14-16: This is a big overstatement. But to give this statement any credence, the authors should *at the very least* provide some examples and references of where this has been the case (I have more comments about this further down). They have not identified any specific disease genes linked to their findings, nor used any specific human disease genes as examples in this study. It is a pity because the study doesn't need it. There are many of us who follow the author's work and understand its value without centering it on humans and our pathologies.

Page 6, lines 30-32: The second clause of this sentence is tricky to follow. I suggest "... we predicted 18,727 **protein-coding genes in the elephant shark genome assembly** and 19,455 protein-coding genes in the Japanese lamprey genome assembly." This is only 5 words longer.

Page 6, line 3: If it does not make the manuscript exceed the word count, please detail which four gnathostome genomes here. This is important because if the elephant shark is one of them, the authors should highlight how essential their new genome assembly is for their analyses.

Page 6, line 5: Here is the first reference to "18 chromosomes". See my general comment about this above.

Page 6, lines 11-12: Since the names "scallop" and "placozoan" are used as general terms, and not as specific common names, the parenthesis around the binomial names *Chlamys farreri* and *Trichoplax adhaerens* should be removed.

Page 6, lines 12-14: Move this text ("also see Supplementary Fig. S3...") out of the parenthesis and make it a new sentence.

Page 6, line 20: Use commas around the sub-clause "that were not used in the proto-vertebrate reconstruction".

Page 6, line 25: Add "the" for "**the** Japanese lamprey".

Page 6, lines 25-16: Use commas around the sub-clause "in addition to the existing 'hybrid' genome assembly of the sea lamprey".

Page 6, line 28: Add a comma after "contentious".

Page 6, line 29 - page 7, line 2: This section, removing “For example”, should be moved down to just before the paragraph starting “To distinguish between different polyploidization models...” This way, these different models, which are complex scenarios, are still fresh in the mind of the reader. In addition, the alternative models of polyploidization seems as an aside, “just” an example”, the way they are described now. When, in fact, the reader must be familiarized with them to understand the rest of this section. The text can easily go from “... which have remained contentious, even after the sequencing of the sea lamprey genome”, to “In the present study, we have generated...” without losing clarity or jumping to a separate context (the alternative scenarios).

Page 6, line 32: Start a new sentence at “Another possibility...”

Page 6, lines 29-34: It’s not clear that the authors are referring to 1R here, the same tetraploidization (1R) is mentioned in two scenarios but makes it look like they are *different* tetraploidizations. I suggest “... could be due to additional tetraploidization events in the cyclostome lineage; alternatively, they could be the result of one shared tetraploidization event (1R) at the base of vertebrates followed by segmental (chromosome) duplications in cyclostomes. Another possibility is that the cyclostome lineage experienced a hexaploidization event (whole-genome triplication) following the shared 1R, thus giving rise to  $1 \times 2 \times 3 = 6$  Hox clusters.

Page 7: Throughout this section of the paper I had a very difficult time distinguishing between blocks, segments, scaffolds and chromosomes. Some times a segment can be the same as a scaffold, right? And several segments can be “assembled” into a proto-chromosome? Where do “blocks” come in? Please define these terms clearly. This confusion is carried over to Figure 2.

Page 7, lines 4-8: This sentence is very long and difficult to follow. The authors should move the parenthesis to a new sentence following this, e.g. “... by combining lamprey genomic segments into 104 proto-cyclostome chromosomes (Figure 2). Genomic segments in this case are blocks of conserved synteny that were inferred...”

Page 7, line 6: Remove “the” from “the cyclostome evolution”.

Page 7, line 11: I suggest “because **each of the segments showed conserved synteny with two** different sea lamprey scaffolds.”

Page 7, lines 11- 16. Start a new sentence here, e.g. “In our reconstruction...” Furthermore, this sentence is very long and tricky to follow, and the references to Fig. 2 interrupt the flow and make it even more difficult to understand. I also have some methodological concerns here. I suggest the following: “In our reconstruction, the linkage of the two segments on Scaffold35 was restored in one of the proto-cyclostome chromosomes (green in Fig. 2b) with support from Pacific lamprey linkage markers. On the other hand, the two segments on Scaffold2 were assigned to different proto-cyclostome chromosomes based on the number of paralogs shared between them, which indicate an origin in a whole-genome duplication” I must say that the count of number of paralogs doesn’t convince me much - I can count (roughly?) the same number of dots, 12, in Fig. 2c between the two Scaffold35 segments and between the two Scaffold2

segments. Where do the authors draw the line for considering a number of paralogs as evidence for or against linkage? In addition - to invoke the linkage on Scaffold 35 as a proof that the segments indeed were part of the same proto-chromosome is a circular argument. Why then wasn't the linkage on Scaffold 2 seen as an argument for the ancestral linkage of these segments? This section of text as well as the paragraph that follows, makes the authors' analyses seem almost arbitrary, with "hand-picked" results, when they should rely on carefully considered algorithms. Please clarify this section of the paper so that the reader isn't left with the same impression.

Page 7, line 21: I've already suggested that the authors should move a section of text from the preceding page to this location of the paper. The paragraph starting here is very tricky to follow, starting with the first sentence. I suggest something like - "To distinguish between **these** alternative polyploidization models, we introduced a measure we have called multiplicity, i.e the number of **reconstructed** proto-cyclostome chromosomes that **correspond to each** of the **reconstructed** proto-vertebrate chromosomes." Avoid writing that multiplicity equals "the number of proto-cyclostome chromosomes **originating** from individual proto-vertebrate chromosomes" - This would be a circular argument. This describes a conclusion from the analysis, not how the analysis was made. The authors have not written here how this multiplicity was calculated, how the correspondence between proto-cyclostome and proto-vertebrate chromosomes was made, and I could not find a clear description of this in the supplementary text either. This again makes the analyses seem arbitrary and circular. It is briefly mentioned on page 33 of the supplement, but that's it. Is it part of section 3.3.3 on pages 27-28 of the supplement? The only reference to this "we extended it to also enumerating set partitions into more than 5 proto-cyclostome chromosomes." Is this it? Was the set partition with 6 proto-cyclostome chromosomes the most significant? In any case, describe briefly how this was done in the main text of the paper, and include a clearly marked "multiplicity calculation" (or similar) description in the supplementary text.

Page 7, line 24: Here is another mention of 18 proto-vertebrate chromosomes. The authors should write that they arrived at 17 proto-vertebrate chromosomes *plus* PrvUn. See my general comment above.

Page 7, line 24-25: The sentence "We found that nine out of the proto-vertebrate chromosomes **were duplicated** into six paralogous proto-cyclostome chromosomes." In my opinion, the authors should not write this conclusively about their results at this point of the paper. This statement is the **conclusion** that they arrive at, but for the reader it does nothing to explain **how** they arrived at this conclusion. What did the results look like? Are there any alternative scenarios that could explain the same results? If so, how were alternative scenarios discarded?

Page 7, line 28: Clarify that this first tetraploidization is 1R. For a moment I thought the authors suggested that both the tetra- and hexa-ploidizations occurred at the base of cyclostomes, which confused my reading of the paper.

Page 7, lines 30-34: This is a very long sentence that is difficult to follow. Please break up and clarify.



Page 8, line 1: The authors have not described how many proto-cyclostome chromosomes their reconstruction resulted in. This would seem like an obvious result to share, especially in the context of discussing the number of chromosomes in extant lampreys.

Page 8, line 8: I suggest changing “obtained” with “produced”.

Page 8, lines 10-11: It’s not clear here that the authors are describing their newly sequenced/assembled elephant shark genome. Highlight the fact that this genome assembly is new to this study.

Page 8, line 13: Change “confirmation” with “support”, or “additional support”.

Page 8, line 13-14: It was not the “proto-gnathostome” lineage that underwent the two tetraploidizations. At least 1R occurred in a “proto-vertebrate”. The authors found the evidence of 1R/2R in their “proto-gnathostome” genome reconstruction, but 1R occurred earlier. The authors should also be very clear to describe that 2R occurring in the lineage leading to gnathostomes is a new finding of this study.

Page 8, lines 13-14: “The proto-gnathostome lineage” could be a confusing term. If the time estimates for 1R and 2R that have been done previously are mostly correct, then it’s not at all certain that crown gnathostomes had emerged by the time 2R happened. A key fossil to date this node is the (likely) lobe-finned fish *Guiyu* at approximately 420 million years ago. The earliest fossil showing a bony jaw is the placoderm *Entelognathus*, a likely stem gnathostome also dated at approximately 420 Mya. This marks the minimum age of gnathostomes. The maximum age of gnathostomes is more difficult to estimate, but is bounded by the emergence in the fossil record of ostracoderms, at approximately 468 Mya. This time window overlaps with the suggested ages for 2R, but again it is not at all clear that crown gnathostomes had emerged at this point. Therefore, I think that it would be more accurate to write “the lineage leading to extant gnathostomes” instead of “the proto-gnathostome lineage”.

Page 8, lines 16-22: This paragraph about microchromosomes seems to interrupt the flow of the text. Perhaps it could be shortened and moved down to the following paragraph, after “... even after ~450 million years of gnathostome evolution.” The first sentence of the paragraph ““Analysis of the proto-gnathostome genome also revealed...””) could then be removed.

Page 9, line 17: Add comma after “hypothesis”.

Page 9, line 18: I suggest “... high density of genes (**including ohnologs**) in **the** proto-gnathostome chromosomes...”

Page 9, lines 16 and 18: Ohnologs are mentioned, but there is no description in the main text of the paper, however brief, of how ohnologs were identified/predicted or differentiated from other forms of orthologous genes. There is a good description in the supplementary information, but the main text of the paper should give *some* understanding of this. Especially because it is mentioned in the introduction that “our reconstructions serve as a reliable reference for accurate annotation of ohnologs.”

Page 9, lines 22-24: This sentence is tricky to follow I suggest - “The timing of gnathostome-cyclostome divergence relative to the two basal vertebrate tetraploidization events (i.e. 1R and 2R) remains an unresolved issue in the field of vertebrate **genome** evolution. Remove the reference to 1R/2R occurring in “proto-gnathostome lineage”. This is incorrect. See also my comment above regarding “the lineage leading to extant gnathostomes” rather than “the proto-gnathostome lineage”.

Page 9, line 24-25: I suggest “we searched **our reconstructions of the** proto-vertebrate...”

Page 9, line 27: Remove the parentheses and insert a comma after “models”.

Page 9, line 32: I suggest “... before 2R, **but after 1R.**”

Page 10, line 2: Regarding the text in parentheses, “or diverged even before 1R”. This is a much bigger discussion and should not be relegated to a parenthesis. If this were true, then the authors’ own proposed scenario would be consistent with independent 1R events in cyclostomes and the lineage leading to gnathostomes. What in their results, and indeed in previously published studies, suggests that this is a possibility? To the best of my knowledge, the evidence points away from this conjecture.

Page 10, line 5: When the authors write “we performed a gene-tree analysis”, it gives the faulty impression that the authors created these gene trees themselves. In fact, the authors have analyzed automatically generated Ensembl gene trees. This is a possible weak point in the analyses, so the authors should clearly describe what they have done.

Page 10, lines 10-22: This section is very difficult to follow. It seems like a substantial part of the description of results and the arguments are missing. The authors state **that** they arrived at certain conclusions, but it is not at all clear to the reader **how or why** they arrived at these conclusions. Not all of the argumentation should be left to the supplementary text. For example, on line 11 the authors describe “homeologous proto-gnathostome and proto-cyclostome chromosomes”, but calling them homeologous is a conclusion in itself. How did they arrive at this. The following subclause, “seemingly suggesting a contradictory model...” is very unclear. How could both quadruple and sextuple chromosomes arise at the same time? I think they authors simply suggest that this is evidence for a shared tetraploidization at the base of vertebrates, i.e. 1R. How is this a “contradictory model”? Contradictory to what? It is near impossible to distinguish between paralogs generated in 1R and those generated in 2R (although the authors have made a good attempt at dating them by analyzing Ensembl gene trees), but a large amount of 1R generated paralogs shared between gnathostomes and cyclostomes is not contradictory to independent chromosome rearrangements in each of the lineages. Or have the authors been able to date the paralogs so precisely that this set of paralogous genes includes both 1R- and 2R-generated paralogs? Also, be sure to clarify that the hypothesis of 2R being a gnathostome-specific event is based on **their** result and this study. The fact that 2R might be gnathostome-lineage-specific doesn’t necessarily mean that it is a **later** event. The estimations of time-points for 2R, the emergence of crown gnathostomes, and the gnathostome-cyclostome divergence all overlap, and the authors have not done a time-estimate calculation of their own.

Page 10, line 17: Add “the” before “establishment”.

Page 10, line 19: I would suggest that polyploidization through hybridization is common “**to some extent**” in animals.

Page 10, line 27: Here is another reference to 18 ancestral chromosomes when it should be 17 (see general comment above).

Page 11, lines 2-3: “, which can be explained by allotetraploidization” is a repetition and can be removed.

Page 11, line 2: Add the indefinite article “A” to “A comparison with modern...”

Page 11, line 9: Another reference to 18 ancestral chromosomes. Also, the formula  $18 \times 2 \times 3$  can be misleading. It's not clear here that “x2” refers to 1R. Also, the authors have not revealed how many proto-cyclostome chromosomes their reconstruction ended up in. Was it as neat as  $18 \times 2 \times 3 = 108$ ? If so, they should mention very clearly, somewhere in the text, whether their estimation of the number of proto-cyclostome chromosomes was constrained by the 18 (17, really) proto-vertebrate chromosomes they had already reconstructed.

Page 11, line 16: “Evolutionary hexaploidy” is not an accepted term and could be confusing. Simply removing “evolutionary” would clear it up. Alternatively, I suggest something like “There are several documented examples of hexaploidy giving rise to new evolutionary lineages”.

Page 11, lines 25-26: The authors of this study are not the first to suggest this. See *Vertebrate evolution by interspecific hybridization – are we polyploid?* by Jürgen Spring in *FEBS Letters* 400, 2–8, 1997, for an early-ish example. They are not the first to suggest that hybridization played a role at the early stage of vertebrate evolution. In more general terms, hybridization has been part of the discussion since Susumu Ohno's time - he writes about it in the “Mechanisms of Gene Duplication” chapter of *Evolution by Gene Duplication* in reference to both auto- and allo-tetraploidy, and he mentions triploidy, though he does write that “Such an interesting oddity, however, is a side issue of vertebrate evolution.” At this point of the paper, the authors should perhaps temper their discussion to reflect the long ongoing discussion surrounding the role of hybridization in polyploidization and the origin of vertebrates. In the supplementary text, the authors contrast “their” hybridization scenario against the “octaploidy hypothesis”. This makes a neat and tidy way to launch hybridization as a new hypothesis, but it has in fact been discussed previously. What's exciting about this paper, is that it adds evidence to this ongoing discussion.

Page 12, lines 2-4: This sentence highlights an issue with this whole section of the discussion: suddenly the authors are describing the proto-gnathostome genome rather than the proto-vertebrate genome... Do they mean to say that only 2R, and not 1R, was an allopolyploidization event? Why not 1R? This is especially confusing since the authors started the section talking about the proto-cyclostome genome and hexaploidization. It should be **abundantly** clear which tetraploidization events they are referring to.

Page 12, line 2: I would change “shows” to “suggests”.

Page 12, lines 10-11: I suggest “... throughout most gnathostomes, [comma] including cartilaginous fishes, but are **missing** in invertebrates, [comma] including the closest relatives of **vertebrates**, such as **tunicates** and amphioxus.”

Page 12, line 13: Add a comma after “events”.

Page 12; lines 30-31: It's not clear whether MHC, NKC and LRC were located on **different** microchromosomes or the same microchromosome. The authors write about *cis*-preserved genes on the next page (line 2), but the context we are in as readers is tetraploidizations, which suggests different chromosomes... The authors use microchromosomes in plural on page 12, line 31.

Page 12, line 30 - page 13, line 7: The authors have traced the **locations** where there would be MHC, NKC and LRC genes back to early vertebrate evolution, but are there any indications that the genes themselves were present at this time? After 1R? After 2R in gnathostomes?

Page 13, lines 9-22: I think this section is overstated. See my comment above regarding page 5, lines 14-16. The fact that some ohnologs are human disease genes is underwhelming. Of course they are. There are many more that are **not**. The studies the authors have cited are more concerned with dosage issues in anciently polyploid genomes such as ours, and that when those dosages in the re-diploidized genomes are perturbed, by copy-number variations for example, they may result in disease. This is interesting in terms of genome evolution and the constraints upon genome structure and evolution, which are revealed when disease arises. In these terms, there is a connection to the present study, and this study adds to the knowledge about constraints on genome evolution. But from there it is a big step to say that this study has “implications for understanding human genetic diseases”, which suggests implications for disease origins, disease progression or even disease treatments. Please restate this section, and the section at the end of the introduction on page 5, in terms of constraints on genome evolution, rather than by linking it to human disease.

Page 13, lines 28-32: Several statements in this concluding section need to be tempered down a bit. On line 28 - “contentious” is perhaps a bit strong. I suggest “our reconstructions address several unresolved issues”. Regarding “the origin of the adaptive immune system”, the authors have provided a brief and very general discussion about the evolution of the adaptive immune system. This statement should be understated somewhat. The reference to human diseases should be left out.

Figure 1: Most of the figure caption is not relevant for the graphical interpretation of the figure. If the results or the methodology are not described well enough in the main text, change the main text instead of adding this much information to the figure caption. For example, the whole section between lines 2-8 should be removed (“We reconstructed the...”). The final sentence of the legend also does not belong here. The caption can be shortened further by changing to “The

*Trichoplax* and elephant shark scaffolds were sorted...” to avoid repetition. As for the figure itself, it would be useful if the 17+PvcUn chromosomes were enumerated in the y-axis.

Figure 2: It should be clear that the figure shows examples and not the full data. Again, there is some confusion of terms between scaffolds, segments, subgroups and chromosomes. I suggest the following to perhaps clarify this - “Japanese lamprey scaffolds **(a)** were correlated with proto-vertebrate chromosomes (Pvc). Scaffolds corresponding to Pvc3 are shown in blue and to Pvc17 are shown in green. Segments of conserved synteny from the lamprey scaffolds were clustered into proto-cyclostome chromosomes **(b)** based on the distribution of paralogs vs. orthologs. The triangular plot **(c)** is a 45-degree-rotated graph of the paralog distribution **between** the 12 proto-cyclostome chromosomes that correspond to Pvc3 and Pvc17. This shows...” The description of the multiplicity table is too long, and most of it is not relevant for the graphical interpretation of the figure. The figure caption is already too long.

Figure 3: There is too much description of results and discussion in the figure caption that is not necessary for the graphical interpretation of the figure. The whole section starting “The segment lengths are longer in human...” and ending “... and the large macrochromosomes” does not belong in a figure caption. The same is true for “In general, smaller proto-gnathostome chromosomes [...] and large chromosomes with low gene densities” and “As in the gene density plot [...] with high ohnolog densities.” There is also some confusion between “segment length” and “chromosome size” for this figure. The definition of “segment” should be abundantly clear in the main text as well as the figure caption.

Figure 4: I don’t think the authors should include PvcUn in the evolutionary scenario, nor mention 18 (rather than 17) ancestral chromosomes in the caption. PvcUn is a construction of many small sections with weakly conserved synteny that likely “belong” in other chromosomes. It’s a “waste basket” construction, if I’ve understood their methods correctly. The inclusion in the evolutionary schematic gives the wrong impression that it represents a pair of ancestral chromosomes. The grey areas that correspond to PvcUn can be left in the images of the modern genomes, if it’s clearly described in the caption that the grey color corresponds to PvcUn regions. How strong are the conserved synteny that indicate that elephant shark scaffold 25 and chicken chromosome 24 are derived from PvcUn? If it’s only a handful of genes, I would at the very least mark these as striped and not completely filled in with grey color.

Figure 4: The authors have not included any rearrangements or drawn lines between the proto-cyclostome chromosomes and the extant lamprey chromosomes. It’s difficult to see the evidence of the hexaploidization in the lamprey genomes otherwise. If the reader doesn’t have any sort of Then why include the lampreys at all?

Figure 4: The caption suggests that all macrochromosomes in extant gnathostomes resulted from the chromosome fusions that preceded 2R, and that all chromosomes that didn’t fuse resulted in microchromosomes. How can this be? In this figure alone I can see that, for example, chromosome 14 in humans, arguably a macrochromosome, is derived mostly from a Pvc17-derived proto-chromosome, which did not experience any fusions. Even *if* all macrochromosomes are derived from ancestral chromosome fusions, surely not all fusions occurred at the base of vertebrates?

Detailed comments on Supplementary Information:

Page 4, line 5: What was the origin of this elephant shark? The geographic area where it was caught, but also the conditions by which it was caught. The elephant shark is classified as a “Least Concern” species by the IUCN (<https://www.iucnredlist.org/species/41743/68610951>), but it occurs within protected areas, and there are conservation plans in place across its entire geographical range, so this information is important. This information also provides additional assurance that the right species has been used.

Page 11, line 5: The same as above for the Arctic lamprey. How was this animal procured and from which geographic range? In America, the Arctic lamprey could co-occur with the closely related Alaskan brook lamprey (*Lethenteron alaskense*), and in Asia it co-occurs with the Far-Eastern brook lamprey (*Lethenteron reissneri*). The Siberian brook lamprey (*Lethenteron kessleri*) is some times classified as a sub-species of the Arctic lamprey.

Page 12, line 5: How does this genome size compared with the previously publishes genome assembly of the Arctic lamprey? And of the latest assembly of the sea lamprey?

Page 14, lines 21-24: Were these TRINITY transcriptome assemblies from the same individual as the genome assembly? It’s not clear whether these transcriptome efforts were part of the same genome project described in this paper. This should be made clear in the text. The Institute of Molecular and Cell Biology at A\*STAR is cited as the source of the RNA-Seq reads in the BioProjects database, which is the home institute of several of the authors.

Page 18, lines 1-9: The methods described in this paragraph are not entirely clear. For example, “We obtained orthologs and paralogs from gnathostome species...” What does this entail specifically? What kind of dataset was obtained from Ensembl? Sequences? Spreadsheets with annotation IDs and locations etc? How were these obtained from gene trees? Usually Ensembl datasets are obtained through BioMart. Was the complete set of gene trees in Ensembl 75 downloaded? If so, this dataset must have included much more data than only phylogenetic data. For example, it must have included some of the annotation data created by Ensembl, because the authors mention that they looked at whether gene duplicated were annotated as Vertebrata, Euteleostomi or Clupeocephala. Were the trees simply analyzed visually on the Ensembl website? This would be a monumental task. If only *some* Ensembl gene trees were analyzed, how were they selected for analysis. How was the tree data analyzed specifically? The authors write, for example, that small-scale duplicates were discarded. What does this entail specifically? What did their final dataset consist of? What kind of data? So much of the final evolutionary scenario hinges on these analyses, but I haven’t been able to scrutinize it to the level I would like to because I don’t find the information. For example, the analyses hinge on identifying whether gene duplicates are paralogs, but I can’t see how the authors have identified that two genes are duplicates to begin with. How did they positively identify duplicates, specifically.

In general, it would be valuable if the authors described exactly how many orthologs vs. paralogs they identified and included in their dataset. I would also urge the authors to share these datasets either as a supplementary file with the publication or in an online repository, if possible. Unless

this data includes tens or even hundreds of thousands of genes, then I would understand it is not feasible. However, it would be especially relevant for the elephant shark reciprocal BLASTP searches described on page 18, lines 7-9, because it would be important to know how many orthologs they identified, and as a reader I would like to review this list to make sure that the orthology assignments were (mostly) correct. This also goes for the amphioxus/human and lamprey/gnathostome ortholog searches described further down on the page. If it's not feasible to share the resulting datasets, at least describing the searches in more detail would help give the reader an indication of what the results were like. Because, in addition, it is not clear against which datasets/databases the BLASTP-searches described on this page were done. For example, "We performed BLASP search[es] for all species pairs, and identified orthologs and paralogs..." What species pairs? Which gene dataset was used as queries and which datasets/databases were searched? I understand the logic of simply using the top 2 or 4 scoring genes for the BLASP searches, but there is a large potential for mis-matches. I would like at least the possibility to quickly scan the resulting orthology/paralogy assignments to verify, or at the very least know which datasets were used as queries and which ones were searched in order to ensure reproducibility.

Page 18, line 29: What search were these bit-scores derived from. Describe the procedure clearly.

Page 18, line 29: All three conditions or only 1 or 2 of them? It's not clear.

Page 18, line 30: Describe that lamprey vs. amphioxus BLASTP searches were done earlier in this section. Does this refer to the same BLASTP search as the lamprey gene pair bit-scores in the preceding line? The following line also seems to refer to BLAST-searches against sea lamprey genes...?

Page 18, line 26 - page 19, line 8: This section describes the annotation of lamprey paralog genes. It is logical that the authors would consider paralogous gene pairs in lamprey, as described on page 18, lines 19-29. But it is not clear from this section, nor from the main text of the paper, how paralogous gene **pairs** helped identify **hexaploidization** in cyclostomes. I understand that the **distribution** of gene pairs across three ancestral chromosome pairs would still indicate hexaploidization, but if this was the authors' thinking, it should be better described. The information I miss from this section is whether any gene **triplets** were identified, and if so, how many?

Page 19, lines 2-5. I don't understand this reasoning at all. Please clarify. It is not clear what "the pair" are, or what "either of the lamprey genes" refers to. Remove the parenthesis around "We retained seven paralogs..." Also, clarify that the expectation of three rounds of WGD (1R, 2R and a cyclostome-specific WGD) is the hypothesis that they were working with based on the previous suggestion in *Mehta et al. (2013)*. It's important to highlight this because the actual scenario that this study resulted in is different! One WGD (1R) and one hexaploidization! The maximum expected number of paralogs after 1R and then a cyclostome-specific hexaploidization would be  $1 \times 2 \times 3 = 6$ ? At first I was confused because I thought the authors were referring to the latter, not the initial hypothesis. Why 7 though, and not 8?

Page 19, lines 13-15: This section is similarly confusing. What does “the elephant shark gene pair” and “neither of the elephant shark genes” refer to?

Page 21, line 3 (below the algorithm): I suggest “**the** proto-vertebrate genome”.

Page 21, line 4: Clarify **which** lamprey genome.

Page 21, line 4: When the authors write simply “comparing the lamprey genomes with each other and also with four gnathostome genomes...” it reads like they are not explaining further what these comparisons entail. It is not immediately clear that they are referring to the sections that follow (3.2.1, 3.2.2 etc). Please clarify.

Page 23, line 2-2: “The reconstruction with  $K = 18$  was the most significant.” Could the authors please share the full results of this? What was the significance **value** of  $K = 18$ ? What values did other  $K$ s produce?

Page 23, line 14-15: “Syntenic to” does not mean what the authors mean here. Syntenic means that two genes are located on the same chromosome. I suggest “**A comparison of conserved synteny between these proto-vertebrate chromosomes and the scallop genome shows that Pvc17, PvcUn, Pvc8, and Pvc9 correspond to individual scallop chromosomes - chromosomes 3, 13, 6 and 4 respectively.**”

Page 23, line 18: It’s not clear what the authors mean by “in early invertebrate lineages”. Early invertebrates as in at the base of the metazoan lineage (this is very *very* early), or early as in already in an invertebrate ancestor or extant chordates/vertebrates.

Page 23, line 18: I’m still not certain that PvcUn actually represents an ancestral chromosome. Clearly, there is not perfect correspondence between the proto-vertebrate genome reconstruction and the scallop genome, as shown in Figure 4. Because the conserved synteny comparison was one-sided, i.e. proto-vertebrate  $\rightarrow$  scallop, it’s not possible to differentiate between rearrangements in the proto-vertebrate or rearrangements in the lineage leading to the scallop. Doing the analysis the other way, scallop  $\rightarrow$  proto-vertebrate, might show that parts of scallop chromosome 13 correspond to other Pvc’s. So for a large number of segments of weak synteny conservation (i.e. PvcUn) to show conserved synteny with a single scallop chromosome is not definitive evidence. Did all the segments of PvcUn correspond to scallop chromosome 13, or where there segments in PvcUn that could not be assigned? The authors have not described this. Also, they haven’t described how big the conserved synteny segments that make up PvcUn are. I suspect they are very small, which makes any conclusions very tentative.

Page 23: It is notable that the authors haven’t discussed here why these results are so different from the previous reconstruction of the vertebrate genome by the first author (*Nakatani et al. Genome Res. 17(9), 2007*), which reconstructed only 10 ancestral chromosomes. Which scenario is wrong? Is this completely due to the inclusion of a cyclostome in the reconstruction? *Putnam et al. (2008)* didn’t include lamprey synteny and still arrived at 17 ancestral (chordate) chromosomes. I have to ask, also, for the *Nakatani et al. (2007)* ancestral chromosomes to be included in Table S8. This would be very useful.



Page 24, line 7: It can't hurt to add the binomial nomenclature for the silkworm and sea anemone as well.

Page 24, lines 14-15: It is not clear what "assigned scaffolds to **the chromosome** with the largest number of markers" refers to. The proto-vertebrate chromosomes?

Page 24, lines 18-19: I'm not so sure. This suggests that the patterns of synteny are conserved, it says nothing of chromosomes themselves. For example, it does not consider chromosome fissions preceding the time point of the proto-vertebrate reconstruction. What I see in Fig. S3 is that **these particular** conserved synteny patterns, inferred to have existed in early vertebrate evolution, can be "recreated" **to some extent**, by no means perfectly, in invertebrate genomes as well. However, genomes are mixes of different patterns, syntenies and paralogies of different origins, and this study does not address other patterns that may exist in the invertebrate genomes that may indicate other ancestral chromosome configurations. The analyses in these studies were done in only one direction, proto-vertebrate → invertebrates. Starting with another lineage at the outset may reveal other chromosome configurations in the common ancestor.

Page 25, line 4: Change to "**have** remained contentious".

Page 25, line 5: Change to "**the** possibility of cyclostome-specific WGD..." I also suggest removing "intense", as this is a value judgment.

Page 25, line 8: Change to "... WGD, **followed by the** loss of two entire clusters".

Page 25, line 10: Change to "We considered that **a** reconstruction of **the** proto-cyclostome chromosomes..."

Page 25, line 12. Change "comprises" to "comprise".

Page 25, lines 14-15: Change to "Thus, **the** reconstruction..."

Page 25, line 17: Change to "**The** enumeration..."

Page 28, line 3: Change to "**in** the proto-vertebrate lineage..."

Page 28, lines 2-6: Perhaps this is unrelated, but does it then follow that for the proto-cyclostome reconstruction the most significant partition was  $6 = 1R$  followed by hexaploidization?

Pages 29-30: The "red/black/white/grey" metaphor is quite long-winded and very difficult to follow. Please break up and clarify.

Page 31, lines 1-2: Please clarify that the "previous reconstruction" has the same first author as this study. Otherwise we might get the impression that Dr. Nakatani is (unfairly) disowning his previous work.

Page 31, line 5: Regarding the “nine large-scale rearrangements”, I counted nine fusions. How about fissions?

Page 31, line 26: Change “fission” to either “**the** fission” or “fissions”.

Page 32, line 10: Change “chromosomes” to the singular “chromosome” or write “For each **of the** proto-gnathostome chromosomes...”

Page 32, lines 22-23: I suggest “These chromosomes underwent **the first** WGD (1R), [comma] resulting in the **doubling** of the proto-vertebrate **genome**.” Remember that we are generally talking about the **haploid** genome here. “Doubling” of chromosomes could be misinterpreted as referring to the diploid genome.

Page 32, line 23: Change “In the gnathostome lineage” to “In the lineage leading to extant gnathostomes”, see my comment about page 8, lines 13-14, above.

Page 33, lines 6-10: I suggest “**Where** our reconstruction **produced** less than six chromosomes, the remaining chromosomes **out of the expected six are** shown as hatched bars. **Where** our reconstruction **produced** more than six chromosomes, the extra chromosomes **are not shown**. **However**, the extra chromosomes were included in all other figures, [comma] including Figures 1 and 2, although **they are very** small.”

Page 33, line 12: Change “Modern” to “Extant”.

Page 33, lines 15-16: It seems strange to me that so many, and in some cases extensive, “white regions” can be explained to be only centromeres. Perhaps if including also pericentromeric areas, which do contain **some** genes. It’s a small point, but in any case, this is only a conjecture on the authors’ part. In addition, writing “regions excluded from our reconstruction” makes it sound like the authors excluded these regions **purposely**, which I don’t think was the case. I suggest writing “**Regions of the human genome shown in white likely correspond to regions poor in genes, such as centromeres and pericentromeric regions.**” The authors should be careful not to give the false impression that they are showing the complete chromosomes in their reconstruction (Fig. 4). I don’t see centromeres/pericentromeric regions, telomeres and other “gene deserts” in the figure. These can be more closely described as conserved synteny blocks for each of the chromosomes.

Page 33, line 26-29: I suggest “... we plotted paralogs among proto-gnathostome and proto-cyclostome chromosomes **and classified them** into vertebrate **paralogs** (i.e. duplicated in the common ancestral vertebrate), **cyclostome-specific paralogs, and gnathostome-specific paralogs** as described below.”

Page 33, lines 30-31 - Page 34: I suggest removing "Paralogs in the proto-gnathostome genome were represented by human paralogs obtained from BioMart:" and simply starting the sentence as follows - “**Human** paralogs annotated as Vertebrata **in Ensembl** were classified as vertebrate paralogs (blue dots), [comma] and **human** paralogs annotated as Euteleostomi were classified as...”

Page 34, lines 2-3: I suggest "Figure S9 shows the distribution of vertebrate and gnathostome-specific paralogs **mapped onto the reconstructed** proto-gnathostome genome."

Page 34, line 21 (Step 3): "We deleted irrelevant genes from the tree" - This is a very reckless formulation. Who decides what is irrelevant? Instead, describe and defend your criteria clearly and methodically.

Page 34, line 26 (last line): Replace "branching pattern" with "tree topology".

Page 35, line 4: Replace "should be clustered" with "would cluster".

Page 35, line 6: Use the plural "annotations".

Page 35, line 20: Replace "the one third of high-GC genes" with "the third of the genes with the highest GC content".

Page 35, line 25: Make sure that you have described earlier which sea lamprey assembly you have used for these analyses. Is it the latest germline genome assembly version, or the much poorer previous assembly? In any case, it doesn't hurt to remind the reader here as well.

Page 35, lines 25-16: I suggest "The annotation of **sea lamprey paralogs was done** by using RAxML-EPA with **the** WAG matrix (method A), **and** is shown in Figure S13."

Page 35, lines 30-31: The authors refer to the supplementary figures (Fig. S9-S13, and Fig. S14 on the next page) when they write about Hox genes, yet the Hox genes are not marked out in these figures. How will the reader verify that this is correct?

Page 35, line 28 - page 36, line 4: It would be helpful if the authors could discuss the most likely alternative scenario that could explain the same results. Why isn't a shared 1R/2R at the base of vertebrates followed by independent fissions/segmentations a likely scenario? Something like this, shared 1R followed by independent chromosome-level segment duplications and fissions, has been proposed by Jeramiah Smith and co-authors, for instance, based on the synteny conservation of the latest sea lamprey germline genome. Based on the current results presented in this papers, why are these alternative scenarios less likely? This is something that I miss in this paper in general.

Page 36, lines 20-21: The sentence starting "It was previously shown..." is difficult to follow. It's not clear what the "branching patterns" of the human genome refers to. It might just be that a lot of information is packed very densely into this sentence. Please clarify.

Page 37, lines 2-3: I suggest "Figure S14 **suggests** that **a** majority of ohnologs..." It's not entirely clear how this figure shows sequence divergence. Only panel a in the figure seems to show this, is that right? Please clarify.

Page 37, line 4: The authors write “two out of four” but I can’t really see this in the cited figures. Some guidance would be good. In addition, the figure caption for Fig. S14 mentions “two out of **six**”...

Page 44, Figure S3: The y-axis designation “Proto-vertebrate/-cyclostome” is seemingly contradictory. I understand that these are the Japanese lamprey scaffolds, but it is confusing to lead with a seemingly contradictory statement. They can’t be proto-vertebrate and proto-cyclostome chromosomes at the same time. I suggest changing the formulation “proto-vertebrate/proto-cyclostome chromosomes represented by Japanese lamprey scaffolds...” to simply “The Japanese lamprey scaffolds were compared with invertebrate genomes (x-axes). In this way we could validate both the proto-vertebrate and proto-cyclostome chromosome reconstructions. Horizontal orange lines represent the boundaries of Japanese lamprey scaffolds and black horizontal lines represent the boundaries of the corresponding proto-vertebrate chromosomes.” This should be applied to all the similar figures - Fig 1, Figs. S2, S3, S4, S6, S7 - and within the figure captions and manuscript text. Name the y- and x- axes for what they actually show, not what they “represent”. In addition, I cannot see any horizontal grey lines in the figure - they are mentioned in line 5 of the figure caption. I also can’t see the difference between thick and thin vertical lines - mentioned in lines 7-8 of the caption.

Page 44, line 11 (last line of figure caption): See my comment above regarding page 24, lines 18-19. This shows that the synteny patterns can be recreated **to some extent** in invertebrate genomes, but it doesn’t definitively show that they represent ancestral metazoan chromosomes. Be careful with this conjecture.

Page 46-47: This figure caption is inordinately long. Please include only information necessary for the **graphical** interpretation the figure. Everything else should go in the supplementary information text, if it’s not there already. The description of this procedure is very good, it should be part of the main text, not a caption!

Page 48, Fig. S6: It would be very helpful to enumerate Pvc1-17 and PvcUn on the X-axis of the figure, and the proto-gnathostome chromosomes on the y-axis. The caption of this figure illustrates my comment about alternative scenarios. The authors very clearly describe their scenario, and highlight the data which illustrate their point very well. But can they disprove/falsify alternative scenarios? Can this same data illustrate any of the alternative scenarios? What would the data look like if the most likely alternative scenario were true? Could the rearrangements not be post-2R or pre-1R fusions? This analysis doesn’t differentiate between 1R-generated and 2R-generated paralogs. Help the reader navigate these alternatives.

Page 48, Fig. S6: There are some curiosities in this figure that are not mentioned. Notably, the orthology between Pvc17 and proto-gnathostome chromosome 9. Wouldn’t this result from a large-scale fission? When did this occur? The authors have not mentioned fissions in the paper.

Page 48, line 3: Correct “axe” to “axis”.

Page 49, Fig. S7: The horizontal grey lines are barely visible, even when I zoom in on the PDF.

Page 49, line 1: “Comparison with the lampreys and amphioxus genomes.” Comparison of what? Instead of writing “proto-gnathostome” at the y-axis, describe what it actually shows. Correct “lampreys” to “lamprey”.

Page 49, line 7: I can’t tell the difference between thick and thin vertical lines in the figure.

Page 49, lines 8-9: Explain that the 1:4-orthology between proto-vertebrate and proto-gnathostome genomes is shown in the amphioxus panel of the figure, if I’ve understood this correctly. Perhaps it would also be better to order the panels of the figure in the inverse order. In general, it is quite difficult to relate the caption to the figure. Doesn't the two lamprey panels show that both 1R and 2R occurred **after** the divergence of cyclostomes? It shows the same relationships as the amphioxus panel. Very tricky to know what to look at.

Page 49, line 12: None of this numbering is shown in the figure, so it’s very difficult to know what to look at.

Fig. S9 - Fig. S13: Please describe what the x- and y-axes of these figure represent.

Page 56, Fig. S14: I almost gave up trying to interpret this figure. It is incredibly information-dense and there are seemingly some missing parts? Why are there no triangular plots for the upper scatterplots? Please write out next to the rectangular scatterplots what they actually show. For example, I’ve mocked up an image for panel a...

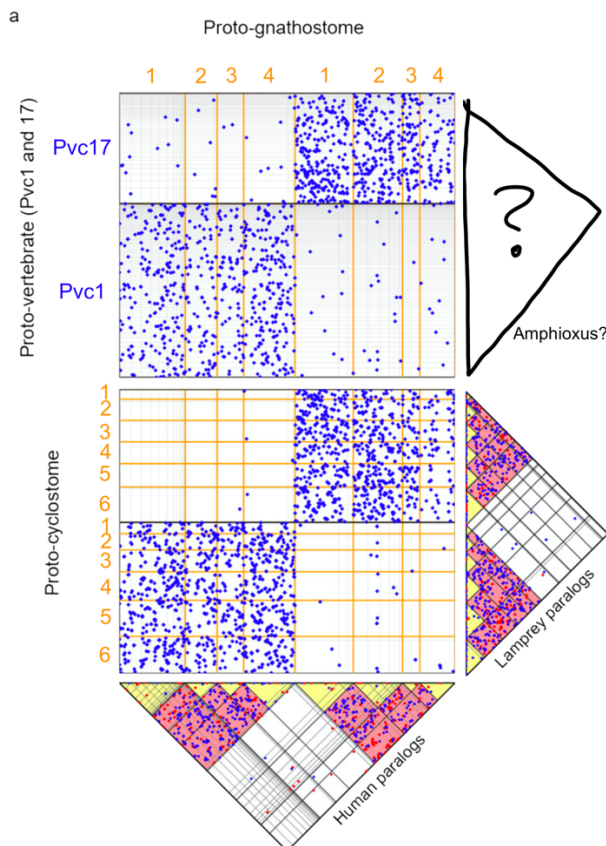

Replace the numbering in orange for the actual chromosome numbers. This was useful for me to see the 1:4 and 1:6 relationships between the proto-vertebrate and the proto-gnathostome and proto-cyclostome, respectively. For the bottom scatterplot, it would also be clearer to use black lines, not orange to mark the boundaries of the proto-cyclostome chromosomes. Because the top and bottom scatterplots are so similar, I was expecting that Pvc1 and Pvc17 were also plotted in the bottom scatterplot. This would avoid the confusing “bottom and left”, “bottom and right”, “bottom six”, “middle two out of six”... give them numbers! I still don't know what “middle two out of six” refers to.

Page 56, line 13-14: Perhaps it would be better to note what the figure **does** show, rather than what it **doesn't** show? I.e. the 1:4 relationship between the proto-vertebrate and proto-gnathostome reconstructions, and the 1:6 relationship between the proto-vertebrate and the proto-cyclostome reconstructions. To be fair, only panel a shows this undoubtedly, but you can argue for panel b and c, which I suspect are the more common occurrences. Also, it would be helpful to know what it would look like if indeed there was 1:1 orthology relationship - i.e. what if the alternative hypothesis is true? Can the data be described with alternative scenarios?

Reviewer #2:

Remarks to the Author:

The manuscript "Reconstruction of proto-vertebrate, proto-cyclostome and proto-gnathostome genomes provides new insights into early vertebrate evolution", by Nakatani et al reports improved genome assemblies for two species (elephant shark and Japanese/Arctic lamprey) and uses these genomes to reconstruct whole genome duplication events, using reconstruction algorithms that have not previously been applied to the problem. These are presented as lending strong support to specific whole genome duplication scenarios. However much of the information necessary to assess the reconstructions is unavailable to the reader, and the analysis of reconstructions does not effectively test their favored hypotheses against previously-proposed hypotheses or others that seemingly emerge from their analyses. Moreover, a more thorough discussion of the biological underpinnings of their proposed evolutionary mechanisms would be welcome, and necessary for readers to understand the implications of the presented analyses. There seem to be relatively straight forward remedies to these issues, which are outlined in the comments below.

Comments:

- 1) First, use of the term "Proto-Cyclostome" is seemingly inappropriate with respect to the reconstructions that are presented in this paper. The lineages leading to sea lamprey and Japanese lamprey diverged approximately 20-30 million years ago. Therefore the hypothetical reconstructed ancestor would more appropriately be called the Proto-Petromyzontid ancestor. This refers to a branch that extends to ~250 MYA at which point the petromyzontid lineage is thought to have split from Geotria lampreys. Without data from other lampreys or hagfish, it seems like over-reaching to call the reconstruction "Proto-Cyclostome".
- 2) The authors state that "Whether microchromosomes were recently created by chromosome fission, or were present in the gnathostome ancestor has been controversial". In my impression this does not accurately reflect the recent state of literature. Multiple analyses of various genomes, including most notably amphibians, gar and lamprey in comparison to birds and elephant shark have seemingly firmly established this.
- 3) In general the authors should strive to more fully articulate alternate models and specifically test the fit of those models to observed patterns across extant genomes, not simply the reconstruction that is optimal under their algorithm. One example of this is the assertion that the numbers of Proto-Petromyzontid chromosomes/segments supports a post-1R triplication. The distribution of paralogous segment counts peaks at 6, which is considered evidence of duplication followed by triplication. However, it should be noted that a simple model of random segmental duplication would also be expected to yield a peak with mean = 6. Constraining this pattern assuming 1R substantially sharpens this peak. Based on a quick permutation test, 1R plus random duplication seems to be a better fit to the observed distribution than 1R + triplication. It is probably also worth considering 1R + duplication and other models. Admittedly, a more formal statistical approach related to the birthday problem of hash collision might provide a more elegant solution than permutation.
- 4) A second comment related to this is that the numbers presented in figure 2d should refer to the numbers of ancestral genes that are incorporated into these classes, not the number of lamprey genes (as these include duplicates).
- 5) Related to this, it would be very useful if the authors could provide the number of orthologs that define each of the presumptive Proto-Cyclostome/Petromyzontid chromosomes presented in figure 4g. It seems that some of these are very small, but it is hard to assess with the presented data.
- 6) At face value the reconstruction method seems to assume 2 rounds of duplication, this appears to impart several important features to the inferred evolutionary history of vertebrates that are worthy of discussion (outlined in more detail below). However it is not clear from the textual description of the

algorithms if some of these are artefacts of analysis since it is not completely clear how under what conditions WGD is presumed to have occurred, or how duplications are differentiated from ancient fissions/translocations under their model (both would be expected to result in the collapse of segments in the ancestor and the presence of duplicates (retained following duplication and rediploidization of neighboring genes, or separating onto derived segments after originating in cis).

7) Fuller articulation of alternate models and rigorous tests of alternatives will also be important for assessing and discussing 2R. Similar to comment 3 above.

8) As mentioned above, several features of the reconstruction are worthy of discussion with respect to their probabilistic and biological meaning. The first of these is the overarching predominance of chromosomal fusion (vs fission) between the 1R and 2R duplications. This reconstruction requires 11 fusion events and zero fissions. This seems noteworthy in light of the fact that there are more even numbers reported between 2R and the basal gnathostome split 3 fissions and 4 fusions. This may attach to comment 6 above, or may reveal an unusual aspect of vertebrate biology that arose briefly following the split of gnathostome and agnathan lineages but before 2R. The timing, mechanics and probability of this seem worthy of extensive discussion.

9) With respect to phylogenetic reconstructions, the authors raise an important point. "Intriguingly, we observed large numbers of vertebrate paralogs between most pairs of homoeologous proto-gnathostome and proto-cyclostome chromosomes, seemingly suggesting a contradictory model where quadruple proto-gnathostome chromosomes and sextuple protocyclostome chromosomes were created before the gnathostomes-cyclostomes split." It is fairly well understood that this pattern pervades these trees and was previously understood to be due to long branch attraction and similar artefactual convergence related to long term substitution biases in lampreys. The authors also mention the possibility that this is explained by allopolyploidization, but do not mention these more mundane explanations, or other alternatives such as true differences in timing of duplication events and hidden paralogy. This part of the discussion is also a bit confusing because earlier in the manuscript 2R is discussed in the context of an allopolyploidization event, whereas this seems to be focusing on peri-1R patterns (or pre-1R?).

10) Examination of the phylogenies of some 6-fold duplicated in lamprey may shed additional light on the timing of presumptive duplications. As was performed previously for sea lamprey hox clusters. It would be nice to see this done for a larger number trees that were generated as part of their analysis pipeline. This would also give readers a better sense of the underlying data.

11) The paragraph starting at the bottom of page 11 related to the asymmetric and unequal contribution from the subgenomes could use further development. Which chromosomes are thought to belong to the A and B subgenomes in Figure 4? Do the authors propose that these have evolved in a manner similar to *Xenopus* wherein one of the subgenomes has lost more paralogs than the other? Please discuss further the degree of asymmetry observed here, and compare to that of *Xenopus* and other systems where it has been observed.

12) The paragraph related to AIS and microchromosomes could also use a bit of development as it is a bit difficult to understand. Is the "immune supercomplex" idea central to the "big bang" theory? It seems that this idea should have fallen by the wayside some time ago, but perhaps this should be developed further? Additionally, the section appears to argue that more immune genes were inherited from the subdominant (b) genome. Is this correct? Some of it would be nice to see this cleared up. Additionally, this clause seems like it might be missing a reference "corroborates the view that a primordial 'adaptive' immune system emerged in the ancestral vertebrate genome and later turned into the intricate gnathostome-like AIS through 2R."

13) The Methods, or large portions thereof, should be elevated to the main body of the manuscript and presented in a manner that is accessible to a broad audience, including assumptions and caveats



that relate to inferring duplications and pre-duplication states.

14) The authors should elevate reporting of assembly improvement to the Results section and develop a figure that more effectively relays improvements. Comparing the cumulative rate of increase in assembly size across increasing scaffold lengths (often included in standard DoveTail reports) would provide important perspective.

15) Code and sequence availability: The authors state that "reconstruction software/code is available on request." However, I would strongly recommend that the code be released on GitHub (or similar) as soon as possible and that reconstructions be included as supplemental data files or placed in another permanent repository. Access to the code and reconstructions are necessary in order to properly assess their findings, and would have likely changed some of the comments made above. An embargoed release of the genomes would also be useful, and has become common practice, although I understand that this is not necessarily standard practice at this point in history.

Sincerely  
Jeremiah Smith

Reviewer #3:

Remarks to the Author:

It was a delight to read the manuscript "Reconstruction of proto-vertebrate, proto-cyclostome and proto-gnathostome genomes provides new insights into early vertebrate evolution" by Nakatani and others. The study reconstructs the genome of the first vertebrates at chromosome/level, by using high-quality genomes of a lamprey and the elephant shark. The results offer a highly detailed and resolved picture of the genome of early vertebrates, gnathostomes, and cyclostomes, shedding new light on the debate about the whole genome duplications. I found the results on microchromosomes very original and interesting. The design of the analyses and the manuscript writing are great, and the conclusions highly relevant to our knowledge of vertebrate origins. I would like to commend the authors for their efforts.

My only criticism is about the discussion about the evolution of the adaptive immune system and MHC. While I think this is very interesting and the data/analyses certainly support the claims, this is only touched in the Discussion section and seems a bit out of the blue. I'd like to suggest to support this either with another section in Results or maybe a figure.

Along those lines, another suggestion to make the paper interesting to a wider audience would be to add a figure in which the different hypotheses about 1R, 2R, and cyclostome-specific WGS are mapped to a phylogeny. This would help some readers to understand better the evolutionary scenario, as well as show the phylogenetic relationships of all the animals involved, which are never shown. If the authors decide to follow this advice, I'd also add photos of the sequenced organisms here. If the paper has reached the limit of displayed items, I think Figure 3 could be easily moved to Supp data, as it is not that informative and there are enough figures with dots in the paper already (this is a very "dotty" paper!).

I do not have any major criticisms, but I have some other comments and questions that I hope the authors can kindly address:

- 1) Page 3, I wonder if the authors could add a reference to the number of vertebrate species. This number keeps creeping up as time goes!
- 2) Page 3, I'd like to suggest replacing "degenerate" by "simplified", as the first has other connotations.
- 3) Page 6 and others, I wonder if the selection of genomes to perform comparative synteny analyses

was just based on evolutionary rates or also on high contiguity genomes.

4) Page 10, first sentence, maybe I need more coffee but I did not understand the bit between parentheses "(or diverged before 1R)". I would like the authors to clarify this in the text.

5) Page 10, the sentence "the ancestral metazoan animal genome", the paper is comparing a mollusc vs a vertebrate. It should say "Bilaterian" rather than "metazoan"

1 Reviewers' comments:

2 Response: We would like to thank all three reviewers for their time and effort in reviewing our manuscript and  
3 offering detailed and constructive suggestions. Their comments have indeed helped to improve the clarity of the  
4 manuscript.

5

6 Reviewer #1 (Remarks to the Author):

7 I am happy to recommend that this article be published by Nature Communications as soon as my comments and  
8 recommendations, as detailed below and in the attached document, are addressed. I don't think that the study  
9 requires additional analyses and I am confident that the methods are appropriate and sufficient, based on my review  
10 as well as previous highly-regarded publications by Nakatani and co-authors, as well as Venkatesh and co-authors.

11

12 The application of the modified probabilistic macrosynteny model to the question of cyclostome-gnathostome  
13 divergence relative to the vertebrate tetraploidizations is especially exciting, as this method has proven its  
14 usefulness in previous publications by Nakatani and co-authors. In addition, the sequencing and chromosome-level  
15 assembly of a lamprey genome and an elephant shark genome will undoubtedly be useful resources for molecular  
16 evolutionary studies in vertebrates and vertebrate genomics. These species hold key taxonomic positions that have  
17 previously been under-addressed due to the lack of high-quality genomic resources. Congratulations on a fantastic  
18 paper!

19

20 However, some methods and procedures are not described clearly, which made some aspects of the analyses  
21 difficult to review. I also have some concerns about the conclusion that the cyclostome lineage underwent a  
22 hexaploidization event. This is a very novel suggestion, and I want to make sure that the authors have done  
23 everything possible to explain their method clearly, so that no serious doubts can be brought forward about the  
24 conclusion.

25

26 My general comments and suggestions are included below, and more detailed comments have been attached in a  
27 separate document.

28

29 General comments:

30

31 **[Comment 01]**- Will the new genome assemblies be shared as part of any of the commonly used public genome  
32 browsers? Is the *Lethenteron camtschaticum* genome assembly, LetJap1.0, the same that has already been shared  
33 through NCBI: [https://www.ncbi.nlm.nih.gov/assembly/GCA\\_000466285.1](https://www.ncbi.nlm.nih.gov/assembly/GCA_000466285.1)? The submitter of LetJap1.0 matches  
34 the home institution of several of the co-authors. If so, the authors should mention in the paper that the genome  
35 assembly has been shared, and direct the reader towards the online databases. If a newer assembly has been made,  
36 this should be shared in the same way. The BioProject entries for the new genomes mentioned in the paper are not  
37 active yet, so I couldn't check them; but presumably these will only include the raw data, not the assembled  
38 genomes. Sharing the genome assemblies in an easily browsable/searchable way is crucial.

39 The Japanese lamprey genome assembly used in the current study is a de novo, PacBio read-based assembly and is  
40 different from the LetJap1.0 assembly version that was also generated by our group. The Japanese lamprey and  
41 elephant shark genome assemblies generated in this study have been submitted to GenBank and will be available in  
42 the public domain before the publication of our manuscript. In the revised version of the manuscript, we have  
43 provided their GenBank accession numbers in the Data Availability section.

44

45 **[Comment 02]**- The figure legends are inordinately long. Please make sure to only include information relevant for  
46 the graphical interpretation of the figure. As they are now, the figure legends include lengthy descriptions of the  
47 methodology and descriptions of results. This should not be included in a figure legend. Otherwise, it may look like  
48 the authors are not confident that their text is good enough for the reader to understand the figures. Or, perhaps  
49 more cynically, that the authors ran out of words in the main text of the paper and are smuggling some of the text  
50 into the paper via the figure legends. They can do better. I have suggested some changes in my detailed comments  
51 (attached).

52 We shortened and simplified the figure legends, following Reviewer 1's suggestions.

53

54 **[Comment 03]**- Another smaller issue is the nomenclature of the Japanese or Arctic lamprey, *Lethenteron*  
55 *japonicum* alt. *Lethenteron camtschaticum*. According to the World Register of Marine Species, *L. japonicum*  
56 (Martens, 1868) is an unaccepted synonym. Source:  
57 <http://www.marinespecies.org/aphia.php?p=taxdetails&id=298380>. The accepted name is *L. camtschaticum*  
58 (Tilesius, 1811). Source: <http://www.marinespecies.org/aphia.php?p=taxdetails&id=101173>. This is also the case in  
59 the FishBase database (<https://www.fishbase.se/summary/Lethenteron-camtschaticum.html>) and in the NCBI  
60 taxonomy browser (<https://www.ncbi.nlm.nih.gov/Taxonomy/Browser/wwwtax.cgi?id=980415>). Please change all  
61 references to the binomial name of this species throughout the manuscript to reflect the accepted nomenclature. At  
62 the first reference to the species, on page 4, the common synonym *L. japonicum* should be mentioned. But it's not  
63 the accepted name. It's all right if the authors use "Japanese lamprey" as the common  
64 name throughout the paper, as long as *L. camtschaticum* is used and the other common name "Arctic lamprey" is  
65 mentioned at the first mention of the species.

66 We thank Reviewer 1 for raising this point. We revised the text and mentioned the accepted nomenclature for  
67 Japanese lamprey.

68

69 **[Comment 04]**- The authors consistently mention 18 photo-vertebrate chromosomes throughout the paper. There  
70 are several issues with this. 1) These are reconstructed chromosomes, so they are a purely theoretical conjecture  
71 about the karyotype of the photo-vertebrate. I understand that it would be cumbersome to clarify this each and  
72 every time they are mentioned, and simply writing "chromosome" is a good shorthand, but the authors should be  
73 absolutely clear, at crucial points of the text, that these are theoretical constructions.

74 1) In the revised manuscript, we made this point clear by writing putative/hypothetical/reconstructed chromosomes  
75 when necessary.

76 2) The reconstruction of the “PvcUn” chromosome is a bit more problematic. I seems to consist of a relatively large  
77 number of small fragments that could not be assigned to any other of the proto-vertebrate chromosome  
78 reconstructions. It is likely that these fragments correspond to other proto-chromosomes and that there is no 18th  
79 proto-vertebrate chromosome. Indeed, in comparing their results to those of Sacerdot et al. (2018), PvcUn seems to  
80 match Pvc17 (Table S8). The authors should make this clear in the main text, not only the supplementary text.

81 2) As written in the initially submitted manuscript, our reconstruction algorithm inferred 18 proto-vertebrate  
82 chromosomes, and we called one of them as PvcUn because it showed unclear macrosynteny conservation in the  
83 outgroup amphioxus genome. We dealt it as the 18th chromosome because it shows one-to-one macrosynteny  
84 correspondence to a small scallop chromosome in Supplementary Figure S4, and also to a chromosome  
85 reconstructed by Sacerdot et al.in Supplementary Figure S3. These observations suggest the possibility that the  
86 macrosynteny conservation was lost in the amphioxus genome due to rearrangements in the amphioxus lineage.  
87 However, we note that the nomenclature could be confusing or misleading, and may obscure this point, so we have  
88 relabelled this as Pvc18 and adjusted the text accordingly to make this clearer.

89 3) Thus, I suggest that the authors refer to 17 proto-vertebrate chromosomes, not 18, and when necessary refer to  
90 “PvcUn” as separate from the set. For example, on page 6, lines 4-5 - I suggest “Our reconstruction of the proto-  
91 vertebrate genome comprises 17 ancestral chromosomes, designated as Pvc1-17, as well as PvcUn, which consists  
92 of weak macrosynteny segments that could not be assigned to Pvc1-17.” Please make sure that this is carried  
93 through for the whole text. Regarding the analysis matching PvcUn to scallop chromosome 13 as an argument for  
94 PvcUn representing a “true” ancestral chromosome, see my comment for page 23, line 18, in the attached  
95 document.

96 3) Our reconstruction algorithm inferred 18 chromosomes and calling one of them as PvcUn was our  
97 interpretation/speculation. In the revised manuscript we relabelled it as Pvc18. We have addressed the specific  
98 comments in the reviewer’s separate document and also include that file in our response.

99

100 **[Comment 05]**- I have some concerns about the description of the analyses of the proto-cyclostome genome  
101 reconstruction, and how the authors arrived at a hexaploidization scenario. My main issue is that these analyses  
102 have not been described well enough for me to make a judgment of whether the conclusions seem correct or not.  
103 For example, Jeremiah Smith and co-authors have suggested the involvement of a series of segmental duplications  
104 in the cyclostome lineage. How did the authors distinguish between genome hexaploidization and genome  
105 tetraploidization + segmental duplications? Simply calculating the “multiplicity” of genes would not address this. I  
106 have detailed some other concerns in the detailed comments (attached document) for pages 6-8 as well as for the  
107 supplements.

108 We would like to emphasize that we calculated multiplicity of chromosomes not genes: first, we counted the  
109 number of reconstructed proto-cyclostome chromosomes that are duplicated from proto-vertebrate chromosome

110 Pvc1, and we found that the “multiplicity” was six; second we repeated this procedure for Pvc2, Pvc3, and so on;  
111 third, we found that nine out of 18 proto-vertebrate chromosomes were duplicated into six proto-cyclostome  
112 chromosomes, which cover the majority of the cyclostome genomes; fourth, we concluded that the sharp peak at  
113 multiplicity six in Figure 3 suggests six-fold duplication of the entire genome (i.e. paleo-hexaploidization), rather  
114 than tetraploidization plus segmental duplications. In the revised manuscript, we added detailed arguments as  
115 follows.

116 “If the proto-cyclostome genome was shaped by three rounds of tetraploidization (S5 in Fig. 1), it should be  
117 covered by chromosomes of multiplicity eight. Instead if it experienced a single tetraploidization with subsequent  
118 chromosomal duplications (S8 in Fig. 1), the multiplicity should peak at two with gradual decrease toward larger  
119 multiplicities. The third possibility is that if the genome went through a single tetraploidization and a  
120 hexaploidization (genome triplication) (S6 in Fig. 1) the majority of the genome should be covered by  
121 chromosomes of multiplicity six.”

122 “Although the current lamprey genomes might still be incomplete and some chromosomes might be fragmented,  
123 such limitations are unlikely to have substantially biased our analysis. First, if the proto-cyclostome genome was  
124 shaped by three rounds of tetraploidization, that would additionally require a large number of subsequent  
125 chromosome fusions to explain the current genome arrangement (for example, 45 post-tetraploidization fusions are  
126 required to obtain the chromosome number of sea lamprey germline cells:  $18 \times 8 - 45 = 99$ ). However, we found that  
127 the lamprey lineage had remarkably low rates of inter-chromosomal rearrangement (Supplementary Fig. S5) over  
128  $\sim 500$  million years<sup>42</sup> of cyclostome evolution. Specifically, our proto-cyclostome genome reconstruction shows  
129 large-scale fusions and translocations affecting only 22 out of 141 Japanese lamprey scaffolds and only 19 out of  
130 151 sea lamprey scaffolds that have at least 10 genes. The exceptionally low rate of inter-chromosomal  
131 rearrangement and the haploid chromosome number of  $\sim 99$  in the germline sea lamprey genome<sup>43</sup> are consistent  
132 with our evolutionary scenario in which the lamprey chromosome number is explained approximately as  $18 \times 6$   
133  $= 108$  with several subsequent fusions. Second, even though some tiny chromosomes might be missing in the  
134 current proto-cyclostome reconstruction, large chromosomes (e.g. Hox-bearing chromosomes duplicated from  
135 Pvc1) are unlikely to be missing entirely; therefore, our reconstruction is particularly reliable for the largest five  
136 proto-vertebrate chromosomes (i.e. Pvc1, 3, 10, 13 and 17), which consistently exhibited a multiplicity of six. Thus,  
137 the high coverage (60.3%) of the Japanese lamprey genome by six-fold duplicated proto-cyclostome chromosomes  
138 suggests that extant cyclostome genomes are paleo-dodecaploids (i.e. the chromosome number increased as  $18 \times 6$   
139 due to tetraploidization and hexaploidization), which might be similar to the situation in sturgeon where a species  
140 (*Acipenser brevirostrum*) with  $\sim 180$  chromosomes is considered to be a hexaploid of a tetraploid ancestor with  
141  $\sim 60$  chromosomes<sup>44-46</sup>.”

142 **[Comment 06]**- In general, I miss a discussion of alternative scenarios in the paper. The authors mention  
143 alternative scenarios proposed by other previous papers like Mehta et al. (2013), Smith & Keinath (2015), Smith et  
144 al. (2018) and Sacerdot et al (2018), but I miss a discussion regarding whether any of these alternative scenarios  
145 could be possible with another interpretation of the results presented in the paper. In other words, can the authors

146 definitely disprove any of the previous alternative scenarios?

147 See our response to a comment from Reviewer 2 [Comment 12].

148 It would be helpful to the reader if the authors could discuss at least the one most likely alternative scenario. Why  
149 isn't a shared 1R/2R at the base of vertebrates followed by independent fissions/segmentations a likely scenario, for  
150 example? Something like this has been proposed by Jeramiah Smith and co-authors, based on the meiotic map of  
151 the previous sea lamprey genome assembly, and more recently based on synteny conservation of the latest sea  
152 lamprey germline genome. I concede that Smith and co-authors have gone back-and-forth and suggested partly  
153 contradictory scenarios, but it seems to boil down to one shared WGD together with chromosome-level segment  
154 duplications and fissions, possibly both preceding and following the WGD. Based on the current results presented  
155 in the present paper, why are these alternative scenarios less likely?

156 We had discussed this issue in the initially submitted manuscript, however, perhaps we were not sufficiently clear.  
157 First, we resolved the divergence timing issue by identifying lineage-specific rearrangements. We found several  
158 chromosome fusions occurring between 1R and 2R as shown in Fig. 6. Those fusions were observed in the proto-  
159 gnathostome genome but not in the proto-cyclostome genome. We interpreted this observation as the evidence that  
160 the cyclostome lineage diverged from the gnathostome lineage between 1R and 2R. Second, we favoured our  
161 tetraploidization-plus-hexaploidization model rather than the 1R-plus-segmental-duplication model, because our  
162 reconstruction showed a clear peak at multiplicity six (Fig. 3). This observation cannot be explained by segmental  
163 duplications, unless we come up with a molecular mechanism through which the numbers of independently  
164 duplicating proto-vertebrate chromosomes eventually converge to six in the proto-cyclostome genome. We also  
165 note that the analyses by Smith et al. [Smith and Keinath, *Genome Res* (2015); Smith et al., *Nat Genet* (2018)] were  
166 not reconstruction-based, and thus they could be affected by lineage-specific rearrangements and incompleteness of  
167 the genome assemblies.

168  
169 **[Comment 07]**- Smith et al. (2018) also have the great advantage of dealing with the germline genome of the sea  
170 lamprey. As is well-known, lampreys greatly modify their genomes in the mature somatic cells, losing upwards of  
171 20% of the genomic DNA. The authors describe that the DNA for the Japanese lamprey genome assembly was  
172 extracted from the mature testis (page 4 of supplementary information), while Smith et al. (2018) specify that  
173 germline DNA was extracted from sperm cells of sea lamprey. I'm not entirely familiar with the methods for SMRT  
174 sequencing, but how confident are you that your Japanese lamprey genome assembly reflects the germline genome?

175  
176 The testis was collected from an adult male during the peak breeding season. As shown in the photo below, the tissue  
177 was full of sperm and the milt oozed profusely when a small incision was made. Thus, the tissue we used was  
178 predominantly sperm and the genome assembly represents the germline genome. We have checked our lamprey  
179 genome assembly for some genes (e.g. *WNT5A*, *HFMI* and *COBLL1*) reported to be lost in the somatic genome of  
180 the sea lamprey (Bryant et al. *Mol. Biol. Evol.* 2016) and they are indeed present in the assembly.

181

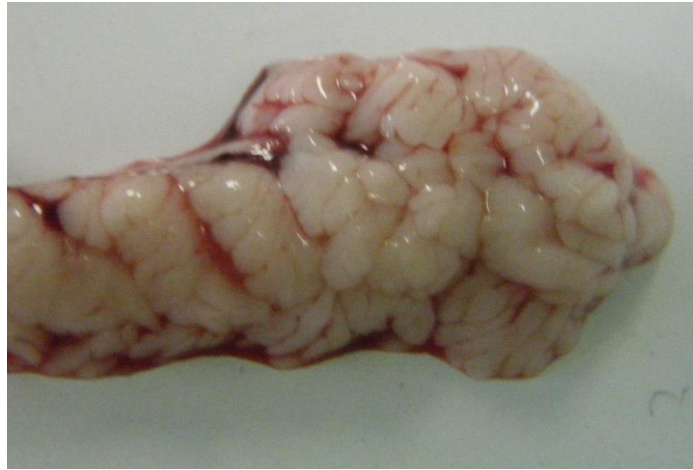

182

183

184

185 **[Comment 08]**- I also have concerns regarding the annotation of orthologs vs. paralog. The method is ingenious,  
186 although it has some limitations, and the principles behind it make sense. However, there are many pitfalls related  
187 to the fact that it is easy to misidentify orthology and paralogy with automatic annotations and gene trees, and with  
188 reciprocal BLASTP searches. I would want to make sure that these pitfalls have been avoided to the utmost extent.  
189 I would like the authors to describe the methods, the procedures, and the datasets in clearer detail in the  
190 supplementary information. As it is right now it would be nigh impossible for anyone to reproduce these analyses.  
191 See my comment in the attached document regarding page 18 of the supplementary information.

192 It seems to be a prevalent misunderstanding that the utmost accuracy is required in a specific step of the  
193 reconstruction method. In reality, what is important in our analysis is to design a robust computational method so  
194 that minor errors (including orthology/paralogy annotation errors) do not affect our conclusions. For this purpose,  
195 we previously developed a probabilistic macrosynteny model, and published the method as a separate paper. The  
196 essential idea common to “macrosynteny” analyses is that the “signals” (i.e. traces of the ancestral genome  
197 structure) remain in the modern genomes even if there is certain amount of “noise” (i.e. small-scale translocations,  
198 small-scale segmental duplications, gene annotation errors, gene tree errors, orthology/paralogy annotation errors,  
199 genome sequencing errors and genome assembly errors, etc). Please see [Nakatani and McLysaght, *Bioinformatics*  
200 (2017)] for a more detailed description of our method. Please also see the figures in Supplementary Information,  
201 because orthology/paralogy annotation errors should be visible as randomly distributed dots. In addition, the  
202 revised manuscript includes the ortholog/paralog dataset used for our reconstructions as Supplementary Data 1.

203

204 **[Comment 09]**- The authors consistently write about implications for human disease, however, I cannot identify  
205 anything in the study that would further our understanding of the molecular/genetic mechanisms of disease, disease  
206 progression, treatment, etc, which is what is clearly implied by centering on human disease. Genetic diseases may  
207 reveal some constraints on genome evolution, which the authors discuss in a relevant way. But from this, there is a  
208 big step to talking about “implications for human disease”. This reference to human disease must be tempered and



209 put into the right context in the revised manuscript. Otherwise, this just looks like a transparent attempt to drive up  
210 the significance of the study by linking it to human disease. Surely the readers of Nature Communications can see  
211 through this, and I certainly don't think it was the author's intention.

212 The ancestral genome reconstruction enables us to recognise relationships between regions of modern genomes by  
213 virtue of their shared descent from a specific macrosynteny block. This has implications for understanding genome  
214 evolution in general, but also identification of hard-to-detect ohnologs. Because ohnologs are so frequently  
215 associated with disease, this has implications for identification of disease genes. We had included the reference to  
216 the link between ohnologs and human disease because we genuinely think it is of great interest, but it is also true  
217 that the value of this paper does not depend on that, so we have removed it from the abstract and introduction, and  
218 now it is just mentioned in passing in the discussion.

219  
220 Finally, my spell checker kept changing "proto" to "photo", "port" or "protocol". I think I have identified the  
221 majority of these mistakes, but if there is a "photo-vertebrate" chromosome here and there in my responses, please  
222 overlook it.

223 It was a lot of work going through this manuscript in the detail that it deserves, but it was a pleasure to take part in  
224 these results before they are released. I apologize if my ignorance of some specific topics made me ask for a lot of  
225 clarification, but think of readers like myself who will benefit from this study without necessarily being experts in  
226 the intricacies of ancient genome reconstruction and macrosynteny algorithms.

227  
228 I wish my colleagues all the best in the publication of this paper and I'm excited for it to come out.

229

230

231 Reviewer #2 (Remarks to the Author):

232 The manuscript “Reconstruction of proto-vertebrate, proto-cyclostome and proto-gnathostome genomes provides  
233 new insights into early vertebrate evolution”, by Nakatani et al reports improved genome assemblies for two  
234 species (elephant shark and Japanese/Arctic lamprey) and uses these genomes to reconstruct whole genome  
235 duplication events, using reconstruction algorithms that have not previously been applied to the problem. These are  
236 presented as lending strong support to specific whole genome duplication scenarios. However much of the  
237 information necessary to assess the reconstructions is unavailable to the reader, and the analysis of reconstructions  
238 does not effectively test their favored hypotheses against previously-proposed hypotheses or others that seemingly  
239 emerge from their analyses. Moreover, a more thorough discussion of the biological underpinnings of their  
240 proposed evolutionary mechanisms would be welcome, and necessary for readers to understand the implications of  
241 the presented analyses. There seem to be relatively straight forward remedies to these issues, which are outlined in  
242 the comments below.

243

244 Comments:

245 **[Comment 10]** 1) First, use of the term “Proto-Cyclostome” is seemingly inappropriate with respect to the  
246 reconstructions that are presented in this paper. The lineages leading to sea lamprey and Japanese lamprey diverged  
247 approximately 20-30 million years ago. Therefore the hypothetical reconstructed ancestor would more  
248 appropriately be called the Proto-Petromyzontid ancestor. This refers to a branch that extends to ~250 MYA at  
249 which point the petromyzontid lineage is thought to have split from Geotria lampreys. Without data from other  
250 lampreys or hagfish, it seems like over-reaching to call the reconstruction “Proto-Cyclostome”.

251 It is correct that we used the two lamprey genomes in our reconstruction, whose last common ancestor is closer to  
252 the proto-petromyzontid ancestor than to the proto-cyclostome ancestor. On the other hand, what we reconstructed  
253 is the post-polyploidization (i.e. post-hexaploidization in our model) genome rather than the last common ancestor  
254 of two lamprey lineages. An analysis of the hagfish Hox gene clusters [Pascual-Anaya et al., *Nat Ecol Evol* (2018)]  
255 suggested that the polyploidization event is shared between the hagfish and lamprey lineages. For this reason, we  
256 favour retaining the term ‘proto-cyclostome’ for describing this reconstruction in the revised manuscript.

257

258 **[Comment 11]** 2) The authors state that “Whether microchromosomes were recently created by chromosome  
259 fission, or were present in the gnathostome ancestor has been controversial”. In my impression this does not  
260 accurately reflect the recent state of literature. Multiple analyses of various genomes, including most notably  
261 amphibians, gar and lamprey in comparison to birds and elephant shark have seemingly firmly established this.  
262 We agree with Reviewer 2 and revised the main text as follows. “Although several recent studies supported the  
263 ancient origin of microchromosomes, it was still unknown (1) if chromosomal features characteristic to modern  
264 avian microchromosomes (i.e. high GC-content, high gene density and high recombination rate) already presented  
265 in the ancestral gnathostome genome, and (2) why microchromosomes have been conserved in distantly related  
266 gnathostome species such as the chicken, spotted gar and elephant shark.”

267

268 [\[Comment 12\]](#) 3) In general the authors should strive to more fully articulate alternate models and specifically test  
269 the fit of those models to observed patterns across extant genomes, not simply the reconstruction that is optimal  
270 under their algorithm.

271 First of all, we need to be aware that it is not possible to reject alternative scenarios by rigorous statistical tests,  
272 because nobody knows realistic parameters of rearrangements occurring in early vertebrate genomes. In particular,  
273 little is known about the probability that chromosome duplications (or chromosome-scale segmental  
274 duplications/deletions) are inherited for long generations and fixed in the population, although we know such large-  
275 scale duplications should be extremely rare and unlikely due to the disruption of gene dosage balance. For this  
276 reason, we could not perform statistical tests for rejecting alternative scenarios in the manuscript. Please also see  
277 our response to [\[Comment 05\]](#) above for additional explanations of alternative models.

278 One example of this is the assertion that the numbers of Proto-Petromyzontid chromosomes/segments supports a  
279 post-1R triplication. The distribution of paralogous segment counts peaks at 6, which is considered evidence of  
280 duplication followed by triplication. However, it should be noted that a simple model of random segmental  
281 duplication would also be expected to yield a peak with mean = 6. Constraining this pattern assuming 1R  
282 substantially sharpens this peak.

283 We concluded that the proto-cyclostome genome was shaped by six-fold duplication of the entire proto-vertebrate  
284 genome, because (1) the five largest proto-vertebrate chromosomes gave rise to six proto-cyclostome chromosomes  
285 and (2) the majority of the Japanese lamprey genome was mapped to these six-fold duplicated chromosomes. Other  
286 scenarios including the 1R-plus-segmental-duplications model are interesting, but we were unable to come up with  
287 a convincing biological mechanism through which the numbers of independently duplicating proto-vertebrate  
288 chromosomes converge to six. Please also see our response to [\[Comment 05\]](#) above.

289 Based on a quick permutation test, 1R plus random duplication seems to be a better fit to the observed distribution  
290 than 1R + triplication. It is probably also worth considering 1R + duplication and other models. Admittedly, a more  
291 formal statistical approach related to the birthday problem of hash collision might provide a more elegant solution  
292 that permutation.

293 To the best of our knowledge, our analysis is the most comprehensive investigation of alternative scenarios  
294 (including the 1R-plus-segmental-duplication scenario). In our reconstruction, we had no prior assumption of the  
295 number of WGD events and segmental duplications: we enumerated possible combinations of lamprey segments,  
296 and chose the combination with the most significant (i.e. non-random) distribution of paralogs and orthologs. Thus,  
297 we do not change our conclusion that the proto-cyclostome genome was shaped by six-fold duplication of the entire  
298 genome, unless someone proposes a convincing biological mechanism through which the numbers of  
299 independently duplicating proto-vertebrate chromosomes converge to six. In order to show that our reconstruction  
300 method explores alternative scenarios comprehensively, we added Supplementary Movie 1, which visualizes the  
301 exploration of alternative scenarios during the reconstruction procedure.

302

303 [\[Comment 13\]](#) 4) A second comment related to this is that the numbers presented in figure 2d should refer to the

304 numbers of ancestral genes that are incorporated into these classes, not the number of lamprey genes (as these  
 305 include duplicates).

306 As Reviewer 2 commented, the numbers of Japanese lamprey genes in Fig. 3d (Fig. 2d in the initially submitted  
 307 manuscript) includes duplicates. If we count a family of paralogs only once, we obtain the following table.

| Multiplicity | Chromosomes              | Genes | Ratio |   |
|--------------|--------------------------|-------|-------|---|
| –            | PvcUn                    | 493   | 0.036 | ■ |
| 4            | Pvc9,14                  | 1088  | 0.080 | ■ |
| 5            | Pvc2,12                  | 1769  | 0.130 | ■ |
| 6            | Pvc1,3,4,7,8,10,13,16,17 | 8188  | 0.603 | ■ |
| 7            | Pvc5,6                   | 817   | 0.060 | ■ |
| 8            | Pvc11                    | 693   | 0.051 | ■ |
| 9            | Pvc15                    | 533   | 0.039 | ■ |
| total        |                          | 13581 |       |   |

308  
 309 The ratio values are almost the same as the original table, and thus the difference does not affect our arguments. In  
 310 the revised manuscript, we kept the original table, because (1) the inference of the numbers of (de-duplicated)  
 311 ancestral genes would impose additional uncertainty because of the possibility of small-scale duplications occurring  
 312 before and during the polyploidization events; and (2) what we discuss with regard to this table is that more than  
 313 60% of the Japanese lamprey genes were mapped to the six-fold duplicated proto-cyclostome chromosomes.

314  
 315 **[Comment 14]** 5) Related to this, it would be very useful if the authors could provide the number of orthologs that  
 316 define each of the presumptive Proto-Cyclostome/Petromyzontid chromosomes presented in figure 4g. It seems that  
 317 some of these are very small, but it is hard to assess with the presented data.

318 The table below shows the statistics. Each line shows (1) proto-vertebrate chromosome name (PVC), (2) number of  
 319 amphioxus genes mapped to the PVC, (3) proto-cyclostome chromosome name (PCC), (4) number of Japanese  
 320 lamprey genes mapped to the PCC, (5) number of sea lamprey genes mapped to the PCC, and (6) number of  
 321 amphioxus genes that are mapped to the PVC and are orthologous to lamprey genes mapped to the PCC.

| Proto-vertebrate | Amphioxus | Proto-cyclostome | Japanese lamprey | Sea lamprey | Orthologous amphioxus genes on the PVC |
|------------------|-----------|------------------|------------------|-------------|----------------------------------------|
| Pvc1             | 1445      | Pcc1A            | 515              | 473         | 304                                    |
| Pvc1             | 1445      | Pcc1B            | 502              | 452         | 283                                    |
| Pvc1             | 1445      | Pcc1C            | 397              | 344         | 250                                    |
| Pvc1             | 1445      | Pcc1D            | 303              | 266         | 177                                    |
| Pvc1             | 1445      | Pcc1E            | 226              | 217         | 154                                    |
| Pvc1             | 1445      | Pcc1F            | 158              | 179         | 121                                    |
| Pvc2             | 891       | Pcc2A            | 287              | 326         | 174                                    |
| Pvc2             | 891       | Pcc2B            | 252              | 228         | 167                                    |
| Pvc2             | 891       | Pcc2C            | 206              | 225         | 154                                    |

|      |     |       |     |     |     |
|------|-----|-------|-----|-----|-----|
| Pvc2 | 891 | Pcc2D | 172 | 177 | 115 |
| Pvc2 | 891 | Pcc2E | 155 | 184 | 78  |
| Pvc3 | 686 | Pcc3A | 264 | 265 | 99  |
| Pvc3 | 686 | Pcc3B | 261 | 234 | 96  |
| Pvc3 | 686 | Pcc3C | 237 | 220 | 89  |
| Pvc3 | 686 | Pcc3D | 231 | 212 | 88  |
| Pvc3 | 686 | Pcc3E | 120 | 131 | 52  |
| Pvc3 | 686 | Pcc3F | 62  | 114 | 47  |
| Pvc4 | 473 | Pcc4A | 171 | 169 | 89  |
| Pvc4 | 473 | Pcc4B | 143 | 171 | 67  |
| Pvc4 | 473 | Pcc4C | 127 | 177 | 66  |
| Pvc4 | 473 | Pcc4D | 18  | 0   | 1   |
| Pvc4 | 473 | Pcc4E | 0   | 16  | 1   |
| Pvc4 | 473 | Pcc4F | 4   | 4   | 0   |
| Pvc5 | 525 | Pcc5A | 190 | 201 | 112 |
| Pvc5 | 525 | Pcc5B | 189 | 175 | 96  |
| Pvc5 | 525 | Pcc5C | 50  | 44  | 20  |
| Pvc5 | 525 | Pcc5D | 0   | 38  | 11  |
| Pvc5 | 525 | Pcc5E | 10  | 22  | 6   |
| Pvc5 | 525 | Pcc5F | 7   | 8   | 2   |
| Pvc5 | 525 | Pcc5G | 9   | 0   | 1   |
| Pvc6 | 385 | Pcc6A | 182 | 212 | 105 |
| Pvc6 | 385 | Pcc6B | 188 | 171 | 86  |
| Pvc6 | 385 | Pcc6C | 108 | 101 | 55  |
| Pvc6 | 385 | Pcc6D | 46  | 56  | 33  |
| Pvc6 | 385 | Pcc6E | 36  | 26  | 17  |
| Pvc6 | 385 | Pcc6F | 0   | 61  | 9   |
| Pvc6 | 385 | Pcc6G | 10  | 0   | 0   |
| Pvc7 | 707 | Pcc7A | 271 | 266 | 173 |
| Pvc7 | 707 | Pcc7B | 260 | 271 | 155 |
| Pvc7 | 707 | Pcc7C | 124 | 112 | 66  |
| Pvc7 | 707 | Pcc7D | 162 | 25  | 43  |
| Pvc7 | 707 | Pcc7E | 11  | 0   | 2   |
| Pvc7 | 707 | Pcc7F | 0   | 10  | 2   |
| Pvc8 | 420 | Pcc8A | 276 | 252 | 130 |
| Pvc8 | 420 | Pcc8B | 207 | 212 | 100 |

|       |      |        |     |     |     |
|-------|------|--------|-----|-----|-----|
| Pvc8  | 420  | Pcc8C  | 40  | 32  | 10  |
| Pvc8  | 420  | Pcc8D  | 15  | 15  | 4   |
| Pvc8  | 420  | Pcc8E  | 0   | 11  | 3   |
| Pvc8  | 420  | Pcc8F  | 2   | 4   | 0   |
| Pvc9  | 563  | Pcc9A  | 355 | 344 | 174 |
| Pvc9  | 563  | Pcc9B  | 277 | 282 | 159 |
| Pvc9  | 563  | Pcc9C  | 145 | 145 | 30  |
| Pvc9  | 563  | Pcc9D  | 23  | 0   | 3   |
| Pvc10 | 962  | Pcc10A | 257 | 240 | 151 |
| Pvc10 | 962  | Pcc10B | 252 | 240 | 148 |
| Pvc10 | 962  | Pcc10C | 218 | 228 | 129 |
| Pvc10 | 962  | Pcc10D | 196 | 205 | 120 |
| Pvc10 | 962  | Pcc10E | 172 | 202 | 115 |
| Pvc10 | 962  | Pcc10F | 128 | 170 | 90  |
| Pvc11 | 844  | Pcc11A | 314 | 296 | 167 |
| Pvc11 | 844  | Pcc11B | 225 | 261 | 126 |
| Pvc11 | 844  | Pcc11C | 107 | 132 | 74  |
| Pvc11 | 844  | Pcc11D | 90  | 80  | 44  |
| Pvc11 | 844  | Pcc11E | 58  | 106 | 39  |
| Pvc11 | 844  | Pcc11F | 12  | 15  | 8   |
| Pvc11 | 844  | Pcc11G | 0   | 28  | 7   |
| Pvc11 | 844  | Pcc11H | 16  | 0   | 1   |
| Pvc12 | 798  | Pcc12A | 366 | 361 | 181 |
| Pvc12 | 798  | Pcc12B | 258 | 259 | 157 |
| Pvc12 | 798  | Pcc12C | 225 | 246 | 151 |
| Pvc12 | 798  | Pcc12D | 157 | 313 | 113 |
| Pvc12 | 798  | Pcc12E | 0   | 14  | 5   |
| Pvc13 | 1196 | Pcc13A | 470 | 441 | 234 |
| Pvc13 | 1196 | Pcc13B | 346 | 342 | 203 |
| Pvc13 | 1196 | Pcc13C | 251 | 232 | 151 |
| Pvc13 | 1196 | Pcc13D | 188 | 217 | 115 |
| Pvc13 | 1196 | Pcc13E | 141 | 173 | 101 |
| Pvc13 | 1196 | Pcc13F | 24  | 0   | 9   |
| Pvc14 | 602  | Pcc14A | 242 | 224 | 130 |
| Pvc14 | 602  | Pcc14B | 175 | 187 | 104 |
| Pvc14 | 602  | Pcc14C | 85  | 159 | 53  |

|       |      |        |     |     |     |
|-------|------|--------|-----|-----|-----|
| Pvc14 | 602  | Pcc14D | 0   | 25  | 6   |
| Pvc15 | 560  | Pcc15A | 251 | 239 | 126 |
| Pvc15 | 560  | Pcc15B | 164 | 194 | 99  |
| Pvc15 | 560  | Pcc15C | 91  | 66  | 47  |
| Pvc15 | 560  | Pcc15D | 53  | 96  | 38  |
| Pvc15 | 560  | Pcc15E | 33  | 12  | 20  |
| Pvc15 | 560  | Pcc15F | 16  | 23  | 14  |
| Pvc15 | 560  | Pcc15G | 0   | 31  | 12  |
| Pvc15 | 560  | Pcc15H | 11  | 0   | 4   |
| Pvc15 | 560  | Pcc15I | 4   | 6   | 2   |
| Pvc16 | 689  | Pcc16A | 283 | 267 | 180 |
| Pvc16 | 689  | Pcc16B | 263 | 254 | 144 |
| Pvc16 | 689  | Pcc16C | 42  | 9   | 11  |
| Pvc16 | 689  | Pcc16D | 9   | 12  | 3   |
| Pvc16 | 689  | Pcc16E | 0   | 10  | 3   |
| Pvc16 | 689  | Pcc16F | 3   | 5   | 2   |
| Pvc17 | 1282 | Pcc17A | 491 | 420 | 291 |
| Pvc17 | 1282 | Pcc17B | 326 | 313 | 203 |
| Pvc17 | 1282 | Pcc17C | 302 | 301 | 184 |
| Pvc17 | 1282 | Pcc17D | 298 | 269 | 182 |
| Pvc17 | 1282 | Pcc17E | 295 | 265 | 173 |
| Pvc17 | 1282 | Pcc17F | 140 | 168 | 108 |
| Pvc18 | 197  | Pcc18A | 859 | 569 | 59  |

322

323 **[Comment 15]** 6) At face value the reconstruction method seems to assume 2 rounds of duplication, this appears to  
324 impart several important features to the inferred evolutionary history of vertebrates that are worthy of discussion  
325 (outlined in more detail below). However it is not clear from the textual description of the algorithms if some of  
326 these are artefacts of analysis since it is not completely clear how under what conditions WGD is presumed to have  
327 occurred, or how duplications are differentiated from ancient fissions/translocations under their model (both would  
328 be expected to result in the collapse of segments in the ancestor and the presence of duplicates (retained following  
329 duplication and rediploidization of neighboring genes, or separating onto derived segments after originating in cis).  
330 The algorithm compares many possible reconstructions (which were called set partitions in Supplementary  
331 Information). In particular, the algorithm considers reconstruction into two, three, four, five, six, seven, eight, ...  
332 duplicated chromosomes. Polyploidization is inferred if the majority of the proto-vertebrate chromosomes have the  
333 same multiplicity in the proto-cyclostome genome (see Fig. 3) or in the proto-gnathostome genome (see Figs. 4, S6

334 and S7). Pre-1R fissions are expected to result in two distinct ortholog distributions (see Fig. 1 in [Nakatani and  
335 McLysaght, *Bioinformatics* (2017)]). Fusions and fissions between 1R and 2R can be distinguished by a  
336 comparison with outgroup genomes (see [Nakatani et al., *Genome Res* (2007)]). Post-2R rearrangements and  
337 fragmental genome assemblies result in smaller segments, which can become small fifth and sixth chromosomes in  
338 the proto-gnathostome reconstruction or seventh and eighth chromosome in the proto-cyclostome reconstruction.  
339 Smaller-scale rearrangements (translocations and segmental duplications) affecting only a small number of genes  
340 are not detectable in our macrosynteny analysis, but they are expected to be visible in paralog/ortholog plots as  
341 isolated clusters of dots (Supplementary Figs. S3-S7, S9-S13).

342  
343 **[Comment 16] 7) Fuller articulation of alternate models and rigorous tests of alternatives will also be important for**  
344 **assessing and discussing 2R. Similar to comment 3 above.**

345 To the best of our knowledge, our study is the most comprehensive analysis of alternative models. Specifically, our  
346 algorithm explores all possible reconstructions and examines the paralog distributions. During this process, the  
347 algorithm does not exclude alternative scenarios including segmental duplications, chromosome  
348 duplications/losses, tetraploidization, hexaploidization, and so on. In addition, rigorous tests of alternatives are not  
349 possible at present, as explained in our reply to [Comment 12] above.

350  
351 **[Comment 17] 8) As mentioned above, several features of the reconstruction are worthy of discussion with respect**  
352 **to their probabilistic and biological meaning. The first of these is the overarching predominance of chromosomal**  
353 **fusion (vs fission) between the 1R and 2R duplications. This reconstruction requires 11 fusion events and zero**  
354 **fissions. This seems noteworthy in light of the fact that there are more even numbers reported between 2R and the**  
355 **basal gnathostome split 3 fissions and 4 fusions. This may attach to comment 6 above, or may reveal an unusual**  
356 **aspect of vertebrate biology that arose briefly following the split of gnathostome and agnathan lineages but before**  
357 **2R. The timing, mechanics and probability of this seem worthy of extensive discussion.**

358 It was previously argued that early vertebrate lineages experienced two contrasting modes of genome structure  
359 evolution: i.e., some early vertebrate lineages had a relatively stable (or slowly evolving) genome structure for a  
360 long evolutionary time, while other lineages had many chromosome fusion events in a relatively short period of  
361 evolutionary time [Nakatani et al., *Genome Res* (2007), Nakatani and McLysaght, *Bioinformatics* (2017)]. The  
362 proto-gnathostome lineage might have experienced a rapid transition from a phase of stable/slow karyotype  
363 evolution to a phase of frequent chromosome fusions. The mechanism is unknown, but karyotypic reversal (from  
364 acrocentric chromosomes to metacentric chromosomes) by Robertsonian fusions is observed in mammals [Pardo-  
365 Manuel de Villena and Sapienza, *Genetics* (2001)], and a similar phenomenon might have occurred in the proto-  
366 gnathostome lineage.

367 We added this paragraph in Supplementary Information (Section 4.3).

368  
369 **[Comment 18] 9) With respect to phylogenetic reconstructions, the authors raise an important point. “Intriguingly,**



370 we observed large numbers of vertebrate paralogs between most pairs of homoeologous proto-gnathostome and  
371 proto-cyclostome chromosomes, seemingly suggesting a contradictory model where quadruple proto-gnathostome  
372 chromosomes and sextuple protocyclostome chromosomes were created before the gnathostomes-cyclostomes  
373 split.” It is fairly well understood that this pattern pervades these trees and was previously understood to be due to  
374 long branch attraction and similar artefactual convergence related to long term substitution biases in lampreys. The  
375 authors also mention the possibility that this is explained by allopolyploidization, but do not mention these more  
376 mundane explanations, or other alternatives such as true differences in timing of duplication events and hidden  
377 paralogy.

378 We added a sentence and mentioned the difficulties in gene tree inference: “This observation may be explained by  
379 difficulties in gene tree inference due to the high GC content and strong codon bias in the lamprey genomes.”

380 This part of the discussion is also a bit confusing because earlier in the manuscript 2R is discussed in the context of  
381 an allopolyploidization event, whereas this seems to be focusing on peri-1R patterns (or pre-1R?).

382 We deleted some text in this paragraph, because Reviewer 1 also commented that this part is confusing (see  
383 Reviewer 1’s minor comment S62).

384

385 **[Comment 19]** 10) Examination of the phylogenies of some 6-fold duplicated in lamprey may shed additional light  
386 on the timing of presumptive duplications. As was performed previously for sea lamprey hox clusters. It would be  
387 nice to see this done for a larger number trees that were generated as part of their analysis pipeline. This would also  
388 give readers a better sense of the underlying data.

389 We had already tried such an analysis, but we found only a small number of lamprey genes with six or more  
390 retained ohnologs. Our analysis showed that cyclostome-specific paralogs are enriched in a few pairs of proto-  
391 cyclostome chromosomes (see Supplementary Figures S9–S13, confirming the analysis by J.J. Smith and  
392 colleagues described in the germline sea lamprey genome paper [Smith et al., *Nature Genet* (2018)].

393

394 **[Comment 20]** 11) The paragraph starting at the bottom of page 11 related to the asymmetric and unequal  
395 contribution from the subgenomes could use further development. Which chromosomes are thought to belong to  
396 the A and B subgenomes in Figure 4?

397 We added subgenome information in Figure 6 (Fig. 4 in the initially submitted manuscript) (i.e. proto-gnathostome  
398 chromosomes are surrounded by thick black line if they belong to the subgenome with a higher rate of gene loss).

399 Do the authors propose that these have evolved in a manner similar to *Xenopus* wherein one of the subgenomes has  
400 lost more paralogs than the other? Please discuss further the degree of asymmetry observed here, and compare to  
401 that of *Xenopus* and other systems where it has been observed.

402 In our reconstruction, the ratio of retained genes between the two subgenomes is 2.25, which is considerably larger  
403 than previously reported ratios of paleo-allopolyploids: 1.47 for *Brassica*, 1.46 for maize, 1.24 for sorghum, 1.17  
404 for *Arabidopsis* and 1.35 for *Xenopus laevis* [Garsmeur et al., *Mol Biol Evol* (2014); Session et al., *Nature* (2016)].

405 We added this sentence in the main text in Subsection “Inferred scenario of early vertebrate genome evolution”.

406 [Comment 21] 12) The paragraph related to AIS and microchromosomes could also use a bit of development as it  
407 is a bit difficult to understand. Is the “immune supercomplex” idea central to the “big bang” theory? It seems that  
408 this idea should have fallen by the wayside some time ago, but perhaps this should be developed further?  
409 The “immune supercomplex” idea is a model for explaining the “immunological big bang”. See [Flajnik *Nat Rev*  
410 *Immunol* (2018); Kaufman, *Annu Rev Immunol* (2018), the last paragraph in Page 394] for recent reviews.

411 Additionally, the section appears to argue that more immune genes were inherited from the subdominant (b) genome.  
412 Is this correct? Some of it would be nice to see this cleared up.

413 We appreciate this suggestion. We performed an analysis of gene ontology enrichment between the two subgenomes,  
414 and found that the genes derived from the shorter subgenome (with a higher rate of gene loss) are enriched with  
415 defense/immunity proteins. We added the following sentence in the main text: “In addition, we observed  
416 functional biases between the two subgenomes: the human genes in the segment derived from the  
417 shorter subgenome were enriched with ‘defense/immunity protein’ in PANTHER Protein Class (FDR  
418  $q = 2.75 \times 10^{-13}$ , see Supplementary Information Section 4.5).”

419 Additionally, this clause seems like it might be missing a reference “corroborates the view that a primordial  
420 ‘adaptive’ immune system emerged in the ancestral vertebrate genome and later turned into the intricate  
421 gnathostome-like AIS through 2R.”

422 We added the following review papers: [Flajnik and Kasahara, *Nat Rev Genet* (2010); Flajnik, *Nat Rev Immunol*  
423 (2018); Ohta et al., *J Immunol* (2019)].

424  
425 [Comment 22] 13) The Methods, or large portions thereof, should be elevated to the main body of the manuscript  
426 and presented in a manner that is accessible to a broad audience, including assumptions and caveats that relate to  
427 inferring duplications and pre-duplication states.

428 Our reconstruction method consists of two steps. In the first step, we reconstructed the proto-vertebrate genome  
429 using the probabilistic macrosynteny model, which was published as a separate paper [Nakatani and McLysaght,  
430 *Bioinformatics* (2017)]. In the second step, we reconstructed the proto-cyclostome and proto-gnathostome  
431 genomes. In this step, we employed the method previously described in [Nakatani et al., *Genome Res* (2007)]. We  
432 extended the previous method so that multiple post-WGD genomes can be used for reconstruction. In addition, the  
433 possibility of fusions/fission between 1R and 2R is also explored during the search for the optimal reconstruction  
434 (called set partition in Supplementary Information). The basic idea of the second step is now described in the main  
435 text and illustrated in Figure 4 (Fig. S5 in the initially submitted manuscript). The fundamental idea (or  
436 assumptions) in our reconstruction is that paralogs are distributed non-randomly: they should be found mostly  
437 between duplicated chromosomes [Nakatani et al., *Genome Res* (2007)]. There are several caveats. First, it would  
438 be difficult to obtain a reliable reconstruction if the available genomes have been shuffled extensively. For  
439 example, teleost genomes are known to have had high rates of chromosome fusions (before the teleost-specific  
440 WGD event) and intra-chromosomal rearrangements, and thus teleost genomes are not suitable for the proto-  
441 vertebrate reconstruction. Second, we should avoid relying too much on a single genome, since it might be affected  
442 by lineage-specific rearrangements, genome assembly errors, limited contiguity of scaffolds, etc. For this purpose,

443 we used multiple post-WGD genomes in our reconstruction. Third, small chromosomes in the proto-vertebrate and  
444 proto-cyclostome genomes tend to be less reliable than large chromosomes, because it is difficult to identify small  
445 synteny blocks in the post-WGD genomes, especially when post-WGD genome assemblies are not complete and  
446 chromosomes are divided into multiple short fragments. For this reason, we discussed that the majority of the  
447 Japanese lamprey genome was covered by the six-fold duplicated proto-cyclostome chromosomes, and confirmed  
448 that the largest five proto-vertebrate chromosomes were six-fold duplicated in the proto-cyclostome genome.  
449 In the revised manuscript, we added Supplementary Movie 1 and added Figure 4 to the main text (adapted from the  
450 previous supplementary figure S5) in the revised manuscript. In addition, we discussed the limitation of the proto-  
451 cyclostome reconstruction as follows:

452 “Although the current lamprey genomes might still be incomplete and some chromosomes might be  
453 fragmented, such limitations are unlikely to have substantially biased our analysis. First, if the proto-  
454 cyclostome genome was shaped by three rounds of tetraploidization, that would additionally require  
455 a large number of subsequent chromosome fusions to explain the current genome arrangement (for  
456 example, 45 post-tetraploidization fusions are required to obtain the chromosome number of sea  
457 lamprey germline cells:  $18 \times 8 - 45 = 99$ ). However, we found that the lamprey lineage had remarkably  
458 low rates of inter-chromosomal rearrangement (Supplementary Fig. S5) over  $\sim 500$  million years<sup>42</sup> of  
459 cyclostome evolution. Specifically, our proto-cyclostome genome reconstruction shows large-scale  
460 fusions and translocations affecting only 22 out of 141 Japanese lamprey scaffolds and only 19 out of  
461 151 sea lamprey scaffolds that have at least 10 genes. The exceptionally low rate of inter-  
462 chromosomal rearrangement and the haploid chromosome number of  $\sim 99$  in the germline sea  
463 lamprey genome<sup>43</sup> are consistent with our evolutionary scenario in which the lamprey chromosome  
464 number is explained approximately as  $18 \times 6 = 108$  with several subsequent fusions. Second, even  
465 though some tiny chromosomes might be missing in the current proto-cyclostome reconstruction,  
466 large chromosomes (e.g. Hox-bearing chromosomes duplicated from Pvc1) are unlikely to be  
467 missing entirely; therefore, our reconstruction is particularly reliable for the largest five proto-  
468 vertebrate chromosomes (i.e. Pvc1, 3, 10, 13 and 17), which consistently exhibited a multiplicity of  
469 six. Thus, the high coverage (60.3%) of the Japanese lamprey genome by six-fold duplicated proto-  
470 cyclostome chromosomes suggests that extant cyclostome genomes are paleo-dodecaploids (i.e. the  
471 chromosome number increased as  $18 \times 6$  due to tetraploidization and hexaploidization), which might  
472 be similar to the situation in sturgeon where a species (*Acipenser brevirostrum*) with  $\sim 180$   
473 chromosomes is considered to be a hexaploid of a tetraploid ancestor with  $\sim 60$  chromosomes<sup>44-46</sup>.”

474  
475 **[Comment 23] 14) The authors should elevate reporting of assembly improvement to the Results section and develop**  
476 **a figure that more effectively relays improvements. Comparing the cumulative rate of increase in assembly size across**  
477 **increasing scaffold lengths (often included in standard DoveTail reports) would provide important perspective.**  
478 The key statistics of the current genome assemblies (contig and scaffold N50 values) have been mentioned in the  
479 main text. In addition, as suggested by the reviewer, we have now included a supplementary figure (Fig. S1; cited in

480 Supplementary Information) which shows the cumulative rate of increase in the assembly size across increasing  
481 scaffold lengths which clearly shows a higher level of contiguity in the current assemblies. We believe that there is  
482 no need to include this data in the main text.

483

484 **[Comment 24]** 15) Code and sequence availability: The authors state that “reconstruction software/code is available  
485 on request.” However, I would strongly recommend that the code be released on GitHub (or similar) as soon as  
486 possible and that reconstructions be include as supplemental data files or placed in another permanent repository.  
487 Access to the code and reconstructions are necessary in order to properly assess their findings, and would have likely  
488 changed some of the comments made above. An embargoed release of the genomes would also be useful, and has  
489 become common practice, although I understand that this is not necessarily standard practice at this point in history.  
490 At present, the code is not publicly available for download due to copy right issues involving the graphics module  
491 integrated in our code with some modifications. Instead, we added the reconstruction dataset including information  
492 of orthologs, paralogs and segments as Supplementary Data 1.

493

494 The Japanese lamprey and elephant shark genome assemblies generated as part of this study have been submitted to  
495 GenBank under the accession numbers WFAB00000000 and WEZY00000000, respectively. These genome  
496 assemblies will be available in the public domain before the publication of our manuscript.

497

498

499

500 Reviewer #3 (Remarks to the Author):

501

502 It was a delight to read the manuscript “Reconstruction of proto-vertebrate, proto-cyclostome and proto-gnathostome  
503 genomes provides new insights into early vertebrate evolution” by Nakatani and others. The study reconstructs the  
504 genome of the first vertebrates at chromosome/level, by using high-quality genomes of a lamprey and the elephant  
505 shark. The results offer a highly detailed and resolved picture of the genome of early vertebrates, gnathostomes, and  
506 cyclostomes, shedding new light on the debate about the whole genome duplications. I found the results on  
507 microchromosomes very original and interesting. The design of the analyses and the manuscript writing are great,  
508 and the conclusions highly relevant to our knowledge of vertebrate origins. I would like to commend the authors for  
509 their efforts.

510

511 **[Comment 25]** My only criticism is about the discussion about the evolution of the adaptive immune system and  
512 MHC. While I think this is very interesting and the data/analyses certainly support the claims, this is only touched in  
513 the Discussion section and seems a bit out of the blue. I’d like to suggest to support this either with another section  
514 in Results or maybe a figure.

515 We apologize that our discussion of the adaptive immune system was abrupt. We presented the reconstructions and  
516 direct implications in Results, and discussed how our reconstructions as a whole may change our view on the  
517 evolution of early vertebrate in Discussion section. In order to address Reviewer 3’s concern, we revised the  
518 manuscript as follows. First, we revised Figure 6 and showed the inferred positions of the MHC, NKC and LRC  
519 clusters in the proto-gnathostome genome, and showed that these complexes are found in the shorter subgenome.  
520 Second, we revised the introductory sentence and clarified that adaptive immune system might have evolved through  
521 genome hybridization as follows: “In particular, our reconstruction suggests that genome hybridization might have  
522 contributed to the origin of the adaptive immune system (AIS), which is a prime example of a major evolutionary  
523 innovation in early vertebrates.” Since the emergence of gnathostome-like AIS through genome hybridization is a  
524 novel hypothesis, we believe that Discussion is the most suitable section.

525 **[Comment 26]** Along those lines, another suggestion to make the paper interesting to a wider audience would be to  
526 add a figure in which the different hypotheses about 1R, 2R, and cyclostome-specific WGS are mapped to a  
527 phylogeny. This would help some readers to understand better the evolutionary scenario, as well as show the  
528 phylogenetic relationships of all the animals involved, which are never shown. If the authors decide to follow this  
529 advice, I’d also add photos of the sequenced organisms here. If the paper has reached the limit of displayed items, I  
530 think Figure 3 could be easily moved to Supp data, as it is not that informative and there are enough figures with  
531 dots in the paper already (this is a very “dotty” paper!).

532 We added Figure 1 to show typical alternative scenarios and the phylogenetic relationship among representative  
533 species used in our study.

534

535 I do not have any major criticisms, but I have some other comments and questions that I hope the authors can

536 kindly address:

537

538 **[Comment 27]** 1) Page 3, I wonder if the authors could add a reference to the number of vertebrate species. This  
539 number keeps creeping up as time goes!

540 We have now included a link (<http://vgpdb.snu.ac.kr/splist/>) which directs the reader to a comprehensive list of all  
541 ~71,000 extant species of vertebrates.

542 **[Comment 28]** 2) Page 3, I'd like to suggest replacing "degenerate" by "simplified", as the first has other  
543 connotations.

544 Revised as suggested.

545

546 **[Comment 29]** 3) Page 6 and others, I wonder if the selection of genomes to perform comparative synteny analyses  
547 was just based on evolutionary rates or also on high contiguity genomes.

548 We chose high contiguity genomes in Ensembl.

549

550 **[Comment 30]** 4) Page 10, first sentence, maybe I need more coffee but I did not understand the bit between  
551 parentheses "(or diverged before 1R)". I would like the authors to clarify this in the text.

552 The scenario of divergence before 1R is still possible at this point in the manuscript. The scenario was concluded to  
553 be unlikely later in the manuscript because the two lineages share a large number of paralogs. Since multiple  
554 reviewers were confused by this phrase, we deleted "(or diverged before 1R)".

555

556 **[Comment 31]** 5) Page 10, the sentence "the ancestral metazoan animal genome", the paper is comparing a  
557 mollusc vs a vertebrate. It should say "Bilaterian" rather than "metazoan"

558 We wrote metazoan because we showed a macrosynteny conservation with the *Trichoplax* genome. We revised the  
559 main text to "bilaterian animal genome".

1 **Specific comments for manuscript NCOMMS-19-37344-T - “Reconstruction of proto-vertebrate,**  
2 **proto-cyclostome and proto-gnathostome genomes provides new insights into early vertebrate**  
3 **evolution” by Nakatani et al.**

4 **###S1:** Page 2, line 1: Is it necessary to center humans in this conversation? We are after all a very  
5 small part of this story. I suggest “The genomes of vertebrates, including humans, have been  
6 shaped by...”

7 Revised as suggested.

8 **###S2:** Page 2, line 2: I suggest starting a new sentence at “... tetraploidization events. These have  
9 had a lasting impact...”

10 We revised the part as “... events, which have had a lasting impact ...”

11 **###S3:** Page 2, line 3: Strike “However,”

12 Revised as suggested.

13 **###S4:** Page 2, line 6: The authors suggest that the lack of a proto-cyclostome genome  
14 reconstruction has been a limitation in sorting out the timing of the cyclostome-gnathostome  
15 divergence relative to the early vertebrate tetraploidizations. The proto-cyclostome genome  
16 reconstruction is undoubtedly a great tool to resolve this issue, but the limitations truly lie with  
17 the lack of a reliable, mapped, cyclostome genome as well as the unique composition of  
18 cyclostome genomes and sequences. The authors discuss these issues in the manuscript. Can the  
19 statement in the abstract be tempered to reflect this? I suggest that this sentence can be removed  
20 completely without affecting the abstract.

21 The sentence was deleted as suggested.

22 **###S5:** Page 2, line 11-15: I suggest something like “**Our model suggests that** cyclostomes  
23 diverged from **the lineage leading to** gnathostomes after a shared tetraploidization...” In this same  
24 long sentence I suggest the following grammatical review - “; **that** the cyclostome lineage  
25 experienced...”, “; **that** 2R in the gnathostome lineage **was an** allotetraploidization **event...**”, “; and  
26 **that subsequently**, biased gene loss **from one of the** subgenomes...”

27 “Our model suggests” is confusing, because the macrosynteny model is one of several parts of our  
28 reconstruction method. We divided the long sentence by “First, .... Second, .... Third, ....”

29 **###S6:** Page 2, line 13: It’s a tautology to write “the **cyclostome** lineage experienced a **cyclostome-**  
30 **specific hexaploidization**”.

31 We paraphrased it as “the cyclostome-lineage experienced an additional hexaploidization.”

32 **###S7:** Page 2, last sentence of Abstract: Again, this centers humans a bit too much in the story.  
33 The authors do mention the possibility of their findings informing our knowledge of human  
34 disease genes (I have some additional comments about this below), but because the authors have  
35 not identified any specific disease genes, not used any specific human disease genes as examples  
36 in this study, I think it is misleading to mention human disease genes in the abstract.

37 The phrase about human disease was deleted.



38 **###S8:** Page 3, line 2. The word “simple” can be removed. This is a common pitfall when writing  
39 about evolution. “Simple” in relation to what? Surely even these early chordates had some  
40 measure of complexity?  
41 “Simple” was deleted.

42 **###S9:** Page 3, line 4: Add comma - “... species, including humans.”  
43 Revised as suggested.

44 **###S10:** Page 3, line 9: Change to “Osteichthyes, represented by ray-finned fishes and lobe-finned  
45 fishes, including tetrapods”. The clade of lobe-finned fishes (Sarcopterygii) includes tetrapods, it’s  
46 not separate from it.  
47 Revised as suggested.

48 **###S11:** Page 3, line 10: I’m not sure that this opinion of cyclostomes is so general any more.  
49 Perhaps this could be changed to “Cyclostomes are **sometimes** thought to be...”  
50 Revised as suggested.

51 **###S12:** Page 3, line 13: I suggest “**seemingly** degenerate”.  
52 We wrote “seemingly simplified”, due to the comment of Reviewer 3.

53 **###S13:** Page 3, line 15: Start a new sentence at “For example,”.  
54 Revised as suggested.

55 **###S14:** Page 3, lines 20-22: This sentence (“Evolutionary innovations...”) is very long and tricky to  
56 follow. Please break up and clarify.  
57 The sentence was simplified as follows: “Evolutionary innovations at the origin of vertebrates have  
58 been proposed to be the result of ancient tetraploidization events that generated additional  
59 copies of the entire genome<sup>9,10</sup>.”

60 **###S15:** Page 3, lines 22-23: “This view is now widely accepted” seems to refer to the duplication  
61 followed by sub/neo-functionalization scenario, and not to the tetraploidizations themselves,  
62 which I think is the point. Please clarify.  
63 It refers to the view that evolutionary innovations at the origin of vertebrates were facilitated by  
64 the WGD events. We simplified the previous sentence for avoiding a confusion in this sentence.

65 **###S16:** Page 4, lines 7-8: Isn’t “the tendency of lamprey ohnologs to cluster outside gnathostome  
66 gene clades” what is to be expected, i.e. isn’t this the position that follows the taxonomy  
67 correctly? I know what the authors mean - that cyclostome sequences tend to occupy  
68 “paradoxical” positions in gene trees, but surely the position that the authors have described as  
69 “paradoxical” is the expected one?  
70 The branching pattern of gene trees may not reflect the correct phylogenetic relationship of those  
71 species, because lamprey ohnologs tend to cluster together due to the high GC-content of lamprey  
72 genes.

73 **###S17:** Page 4, line 26: It’s misleading to describe the species themselves as “early branching  
74 vertebrates”. At least the lamprey is a **representative** of an early branching vertebrate lineage, but



75 the cartilaginous fishes are just as “early” as the bony fishes, so this description is incorrect. Please  
76 clarify that the two species whose genomes have been sequenced and assembled **represent two**  
77 **crucial divergence points in the evolution of vertebrates.**

78 We revised the sentence as Reviewer 1 suggested as follow: “These two species represent two  
79 crucial divergence points in the evolution of vertebrates.”

80 **###S18:** Page 4, lines 29-32: This sentence (“The major advantage...”) is very long and tricky to  
81 follow. Please break up and clarify.

82 The sentence was simplified as follows: “The major advantage of our method is that it has a high  
83 tolerance to reconstruction uncertainty caused by small-scale rearrangements that have  
84 accumulated over a long evolutionary time.”

85 **###S19:** Page 4, line 33: Syntax error - “... we were able to reconstruct **the first the** proto-  
86 cyclostome genome...”

87 We fixed this.

88 **###S20:** Page 5, lines 1-2: The statement “In addition, our reconstruction of the proto-  
89 gnathostome genome...” comes a bit prematurely. The authors have not yet stated that it was an  
90 aim to do this reconstruction, as they stated with the proto-cyclostome genome reconstruction on  
91 the previous page. I suggest “In addition, **we reconstructed the proto-gnathostome genome using**  
92 **the same strategy, with a higher coverage of extant gnathostome genomes than previous**  
93 **reconstructions...**” The authors have also neglected to mention that their sequencing and  
94 assembly of a new elephant shark genome was crucially integrated into this reconstruction.  
95 Highlight this fact - it’s one of the major advances described in this paper! Similarly, the authors  
96 could highlight how crucial a chromosome-level assembly of a lamprey genome, compared with  
97 previous lamprey genome assemblies, was to their reconstruction.

98 We had already emphasized the importance of the elephant shark and Japanese lamprey genomes  
99 in appropriate positions in the main text. We revised the sentence as follows: “In addition, using  
100 the elephant shark genome, we reconstructed the proto-gnathostome genome with a higher  
101 coverage of extant gnathostome genomes than previous reconstructions”.

102

103 **###S21:** Page 5, lines 7-8: The authors write that they “provide new insights into the genetic basis  
104 underlying evolutionary innovations”. This is an overstatement. Surely, this is a possible future  
105 impact of this study, but as for the present paper there is only a brief and very general discussion  
106 about the evolution of the adaptive immune system. That’s it. Please temper the tone of this  
107 statement to something that reflects the content of this paper more truthfully.

108 It seems that Reviewer 1 misunderstood our arguments in Discussion (see our response to  
109 Comment S75). We revised Figure 6 (Fig. 4 in the initially submitted manuscript) to show  
110 presumed ancestral positions of the genes in MHC, NKC and LRC in the proto-gnathostome  
111 genome (see also Reviewer 3’s Comment 25).

112 **###S22:** Page 5, lines 8-9: This statement is only true if the authors will share the new genome  
113 assemblies in an easily searchable or browsable form, or, even better, share a detailed searchable

114 map of their reconstructions. These possibilities are not mentioned at all in the paper. If the  
115 authors do not plan to share these resources, then the reconstructions will not serve as references  
116 of any kind.

117 We have included GenBank accession numbers of the new genome assemblies, and the  
118 reconstruction dataset has been made available as Supplementary Data 1.

119 **###S23:** Page 5, lines 14-16: This is a big overstatement. But to give this statement any credence,  
120 the authors should at the very least provide some examples and references of where this has been  
121 the case (I have more comments about this further down). They have not identified any specific  
122 disease genes linked to their findings, nor used any specific human disease genes as examples in  
123 this study. It is a pity because the study doesn't need it. There are many of us who follow the  
124 author's work and understand its value without centering it on humans and our pathologies.  
125 See our response to Reviewer 1's [Comment09].  
126

127 **###S24:** Page 6, lines 30-32: The second clause of this sentence is tricky to follow. I suggest "... we  
128 predicted 18,727 **protein-coding genes in the elephant shark genome assembly** and 19,455  
129 protein-coding genes in the Japanese lamprey genome assembly." This is only 5 words longer.  
130 Revised as suggested.

131 **###S25:** Page 6, line 3: If it does not make the manuscript exceed the word count, please detail  
132 which four gnathostome genomes here. This is important because if the elephant shark is one of  
133 them, the authors should highlight how essential their new genome assembly is for their analyses.  
134 We added "including human, chicken, spotted gar and elephant shark".

135 **###S26:** Page 6, line 5: Here is the first reference to "18 chromosomes". See my general comment  
136 about this above.  
137 See our reply to Reviewer 1's general comment about this point.

138 **###S27:** Page 6, lines 11-12: Since the names "scallop" and "placozoa" are used as general terms,  
139 and not as specific common names, the parenthesis around the binomial names *Chlamys farreri*  
140 and *Trichoplax adhaerens* should be removed.  
141 Revised as suggested.

142 **###S28:** Page 6, lines 12-14: Move this text ("also see Supplementary Fig. S3...") out of the  
143 parenthesis and make it a new sentence.  
144 We revised the text as "(Fig. 2, also see Supplementary Fig. S4)."

145 **###S29:** Page 6, line 20: Use commas around the sub-clause "that were not used in the proto-  
146 vertebrate reconstruction".  
147 Revised as suggested.

148 **###S30:** Page 6, line 25: Add "the" for "**the** Japanese lamprey".  
149 Revised as suggested.

150 **###S31:** Page 6, lines 25-16: Use commas around the sub-clause “in addition to the existing  
151 ‘hybrid’ genome assembly of the sea lamprey”.  
152 Revised as suggested.

153 **###S32:** Page 6, line 28: Add a comma after “contentious”.  
154 Revised as suggested.

155 **###S33:** Page 6, line 29 - page 7, line 2: This section, removing “For example”, should be moved  
156 down to just before the paragraph starting “To distinguish between different polyploidization  
157 models...” This way, these different models, which are complex scenarios, are still fresh in the  
158 mind of the reader. In addition, the alternative models of polyploidization seems as an aside,  
159 “just” an example”, the way they are described now. When, in fact, the reader must be  
160 familiarized with them to understand the rest of this section. The text can easily go from “... which  
161 have remained contentious, even after the sequencing of the sea lamprey genome”, to “In the  
162 present study, we have generated...” without losing clarity or jumping to a separate context (the  
163 alternative scenarios).  
164 We decided to keep the current presentation order. The readers need to know alternative  
165 scenarios before they read about the reconstruction method, because the method is specifically  
166 designed to explore the possibility of those alternative scenarios.

167 **###S34:** Page 6, line 32: Start a new sentence at “Another possibility...”  
168 Revised as suggested.

169 **###S35:** Page 6, lines 29-34: It’s not clear that the authors are referring to 1R here, the same  
170 tetraploidization (1R) is mentioned in two scenarios but makes it look like they are different  
171 tetraploidizations. I suggest “... could be due to additional tetraploidization events in the  
172 cyclostome lineage; alternatively, they could be the result of one shared tetraploidization event  
173 (1R) at the base of vertebrates followed by segmental (chromosome) duplications in cyclostomes.  
174 Another possibility is that the cyclostome lineage experienced a hexaploidization event (whole-  
175 genome triplication) following the shared 1R, thus giving rise to  $1 \times 2 \times 3 = 6$  Hox clusters.  
176 At this point in the manuscript, we are not discussing if any WGD events were shared between the  
177 proto-cyclostome and proto-gnathostome lineages.

178 **###S36:** Page 7: Throughout this section of the paper I had a very difficult time distinguishing  
179 between blocks, segments, scaffolds and chromosomes. Sometimes a segment can be the same as  
180 a scaffold, right? And several segments can be “assembled” into a proto-chromosome? Where do  
181 “blocks” come in? Please define these terms clearly. This confusion is carried over to Figure 2.  
182 Segments and blocks refer to chromosomal regions in general (e.g. synteny blocks). Segments are  
183 obtained by using a “segmentation” algorithm as explained in Supplementary Information Section  
184 3. Segments may be whole scaffolds/chromosomes, and they are the building blocks of the  
185 reconstructed chromosomes as explained in Supplementary Information Section 3.  
186

187 **###S37:** Page 7, lines 4-8: This sentence is very long and difficult to follow. The authors should  
 188 move the parenthesis to a new sentence following this, e.g. "... by combining lamprey genomic  
 189 segments into 104 proto-cyclostome chromosomes (Figure 2). Genomic segments in this case are  
 190 blocks of conserved synteny that were inferred..."  
 191 The sentence was divided and shortened.

192 **###S38:** Page 7, line 6: Remove "the" from "the cyclostome evolution".  
 193 Revised as suggested.

194 **###S39:** Page 7, line 11: I suggest "because **each of the segments showed conserved synteny with**  
 195 **two different sea lamprey scaffolds.**"  
 196 Revised as suggested.

197 **###S40:** Page 7, lines 11- 16. Start a new sentence here, e.g. "In our reconstruction..."  
 198 Furthermore, this sentence is very long and tricky to follow, and the references to Fig. 2 interrupt  
 199 the flow and make it even more difficult to understand. I also have some methodological concerns  
 200 here. I suggest the following: "In our reconstruction, the linkage of the two segments on  
 201 Scaffold35 was restored in one of the proto-cyclostome chromosomes (green in Fig. 2b) with  
 202 support from Pacific lamprey linkage markers. On the other hand, the two segments on Scaffold2  
 203 were assigned to different proto-cyclostome chromosomes based on the number of paralogs  
 204 shared between them, which indicate an origin in a whole-genome duplication"  
 205 We do not exclude the possibility of aneuploidy (chromosome-wise duplication) at this point.  
 206 Whole-genome duplication is argued based on Fig. 3d (Fig. 2d in the initially submitted  
 207 manuscript).

208 I must say that the count of number of paralogs doesn't convince me much - I can count (roughly?)  
 209 the same number of dots, 12, in Fig. 2c between the two Scaffold35 segments and between the  
 210 two Scaffold2 segments.  
 211 It seems that Reviewer 1 misunderstood the figure. The numbers of paralogs are shown in the red  
 212 rectangles in the figure below.

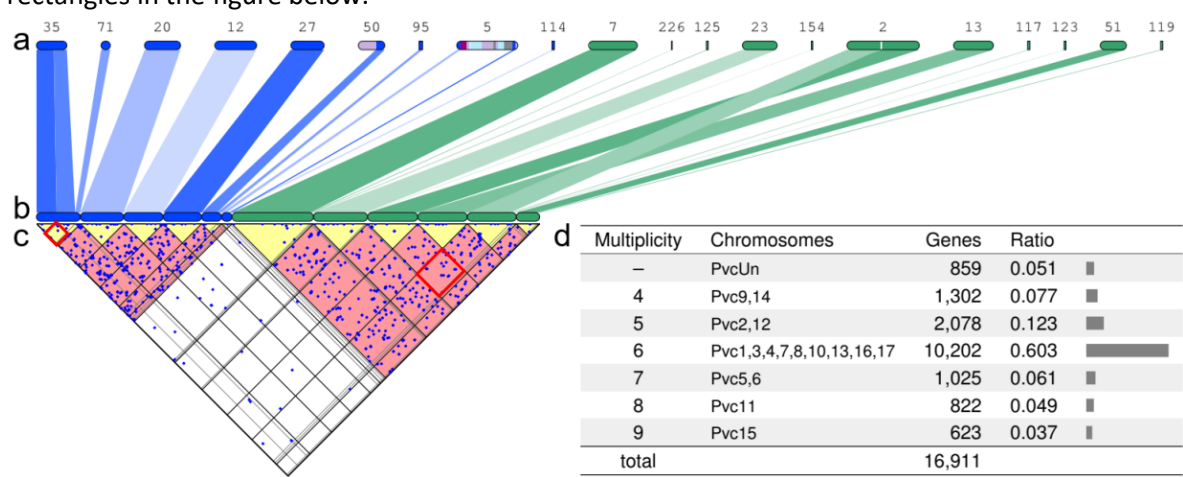

213

214 Where do the authors draw the line for considering a number of paralogs as evidence for or  
215 against linkage?

216 We calculated the significance of the number of paralogs as explained in Supplementary  
217 Information Section 3.

218 In addition - to invoke the linkage on Scaffold 35 as a proof that the segments indeed were part of  
219 the same proto-chromosome is a circular argument.

220 We disagree that it is a circular argument. Lamprey genome assemblies consist of large numbers  
221 of scaffolds and if a chromosome sequence is represented by several short scaffolds in the sea  
222 lamprey genome, the syntenic Japanese lamprey chromosome is also partitioned into several  
223 short segments in our analysis. In other words, lamprey segments tend to be over-fragmented.  
224 When these segments are mapped to the same proto-vertebrate chromosome, we have two  
225 possibilities about their origin in the proto-cyclostome genome: (1) they originate from the same  
226 proto-cyclostome chromosome; or (2) they originate from duplicated proto-cyclostome  
227 chromosomes. These segments are assigned (1) to the same proto-cyclostome chromosome if  
228 they do not share significantly large numbers of paralogs in order to alleviate the  
229 overfragmentation of the lamprey segments; or (2) to duplicated proto-cyclostome chromosomes  
230 if they share significantly large numbers of paralogs. This was described in Supplementary  
231 Information Section 3.

232 Why then wasn't the linkage on Scaffold 2 seen as an argument for the ancestral linkage of these  
233 segments?

234 It was explained in Supplementary Information Section 3. The algorithm disallows two segments  
235 that share a significantly large number of paralogs to be assigned to the same proto-cyclostome  
236 chromosome.

237 This section of text as well as the paragraph that follows, makes the authors' analyses seem almost  
238 arbitrary, with "hand-picked" results, when they should rely on carefully considered algorithms.  
239 Please clarify this section of the paper so that the reader isn't left with the same impression.

240 We relied on the algorithm described in Supplementary Information Section 3. Although we  
241 disagree that our analyses were arbitrary, we revised the section and simplified the text as follows.  
242 "The major advantage of this reconstruction method is its robustness against lineage-specific  
243 rearrangements and fragmentation of genome assemblies. For example, Japanese lamprey  
244 Scaffold2 was partitioned into two segments (Fig. 3a) because each of the segments showed  
245 conserved synteny with two different sea lamprey scaffolds; in our reconstruction (Fig. 3b), and  
246 the two segments on Scaffold2 were assigned to different proto-cyclostome chromosomes  
247 because they share a significantly large number of paralogs (dots in Fig. 3c). Thus, our  
248 reconstruction-based analysis is more reliable than scaffold-based analyses used in previous  
249 studies<sup>18,19,26</sup> and provides the first opportunity to conclusively resolve the controversy over the  
250 origin of the proto-cyclostome genome."  
251

252 **###S41:** Page 7, line 21: I've already suggested that the authors should move a section of text from  
253 the preceding page to this location of the paper. The paragraph starting here is very tricky to  
254 follow, starting with the first sentence. I suggest something like - "To distinguish between **these**  
255 alternative polyploidization models, we introduced a measure we have called multiplicity, i.e the  
256 number of **reconstructed** proto-cyclostome chromosomes that **correspond to each** of the  
257 **reconstructed** proto-vertebrate chromosomes."

258 The phrase was revised as "we introduced a measure we have called multiplicity".

259 Avoid writing that multiplicity equals "the number of proto-cyclostome chromosomes **originating**  
260 from individual proto-vertebrate chromosomes" - This would be a circular argument. This  
261 describes a conclusion from the analysis, not how the analysis was made.

262 It is a result of our reconstruction, and it is not a circular argument (see Supplementary  
263 Information Section 3). We reconstructed duplicated chromosomes, and we concluded that they  
264 were created by whole-genome triplication.

265 The authors have not written here how this multiplicity was calculated, how the correspondence  
266 between proto-cyclostome and proto-vertebrate chromosomes was made, and I could not find a  
267 clear description of this in the supplementary text either. This again makes the analyses seem  
268 arbitrary and circular.

269 We are unsure of the source of confusion here. As we wrote, we counted the number of  
270 duplicated proto-cyclostome chromosomes for each proto-vertebrate chromosome. The clear  
271 description of our reconstruction method can be found in Supplementary Information Section 3.  
272 Our macrosynteny algorithm infers the probabilities that each lamprey segment was derived from  
273 each proto-vertebrate chromosome (see Fig. 1 in [Nakatani and McLysaght, *Bioinformatics*  
274 (2017)]). Then, individual segments were assigned to the proto-vertebrate chromosome with the  
275 largest reconstruction score, as described in Supplementary Information Section 3.2.2. These  
276 segments were reconstructed into proto-cyclostome chromosomes by set partitioning, as  
277 described in Supplementary Section 3.3.

278

279

280 It is briefly mentioned on page 33 of the supplement, but that's it.

281 It is written in Sections 3.2 and 3.3, Pages 21—28 of the initially submitted Supplementary  
282 Information file.

283 Is it part of section 3.3.3 on pages 27-28 of the supplement? The only reference to this "we  
284 extended it to also enumerating set partitions into more than 5 proto-cyclostome chromosomes."  
285 Is this it?

286 The reconstruction of proto-cyclostome chromosomes was described in Section 3.3 from Page 25  
287 to Page 28 of the initially submitted Supplementary Information file. Set partitioning is introduced  
288 in Page 25. Significance of a set partition is explained in Section 3.3.3.

289 Was the set partition with 6 proto-cyclostome chromosomes the most significant?

290 We wrote "For each of Pvc1–Pvc17, we enumerated all set partitions of the clusters, and chose the

291 optimal set partition with the most significant distribution of orthologs and paralogs as the proto-  
292 cyclostome chromosomes” in Page 26 of the initially submitted Supplementary Information file,  
293 and Fig. 3 shows that six-fold duplication was the most significant for nine out of 18 proto-  
294 vertebrate chromosomes.

295 [In any case, describe briefly how this was done in the main text of the paper, and include a clearly  
296 marked “multiplicity calculation” \(or similar\) description in the supplementary text.](#)

297 We thank Reviewer 1 for this suggestion, but we just counted the number of proto-cyclostome  
298 chromosomes. Instead of repeating the same explanation, we made a movie (Supplementary  
299 Movie 1) explaining the reconstruction method.

300 [###S42: Page 7, line 24: Here is another mention of 18 proto-vertebrate chromosomes. The  
301 authors should write that they arrived at 17 proto-vertebrate chromosomes plus PrvUn. See my  
302 general comment above.](#)

303 See our reply to Reviewer 1’s general comment.

304 [###S43: Page 7, line 24-25: The sentence “We found that nine out of the proto-vertebrate  
305 chromosomes \*\*were duplicated\*\* into six paralogous proto-cyclostome chromosomes.” In my  
306 opinion, the authors should not write this conclusively about their results at this point of the  
307 paper. This statement is the \*\*conclusion\*\* that they arrive at, but for the reader it does nothing to  
308 explain \*\*how\*\* they arrived at this conclusion.](#)

309 We rephrased this as ‘Our analysis indicates that ...’ The observation (that nine out of 18 proto-  
310 vertebrate chromosomes were duplicated into six paralogous proto-cyclostome chromosomes)  
311 was the inference result of our reconstruction method. How the method arrived at this result is  
312 explained in Supplementary Information Section 3.3. Our conclusion/interpretation is that the  
313 observation indicates six-fold duplication of the entire genome through one whole-genome  
314 duplication and one whole-genome triplication.

315 [What did the results look like?](#)

316 The resulting reconstruction of the proto-cyclostome genome was illustrated in Fig. 3, Fig. 6, Fig.  
317 S4, Fig. S6, Fig. S7 and Figs. S1014.

318 [Are there any alternative scenarios that could explain the same results? If so, how were  
319 alternative scenarios discarded?](#)

320 We chose the most significant reconstruction from millions of alternative scenarios as explained in  
321 Section 3.3. The calculation of significance is explained in Section 3.3.3. See also Supplementary  
322 Movie 1.

323 [###S44: Page 7, line 28: Clarify that this first tetraploidization is 1R. For a moment I thought the  
324 authors suggested that both the tetra- and hexa-ploidizations occurred at the base of cyclostomes,  
325 which confused my reading of the paper.](#)

326 At this point of the manuscript, we have no information to judge if the polyploidization events  
327 were shared between the proto-gnathostome and proto-cyclostome lineages. Thus we described



328 that one tetraploidization and one hexaploidization occurred between the proto-vertebrate and  
329 proto-cyclostome.

330 **###S45:** Page 7, lines 30-34: This is a very long sentence that is difficult to follow. Please break up  
331 and clarify.

332 Revised as suggested.

333 **###S46:** Page 8, line 1: The authors have not described how many proto-cyclostome chromosomes  
334 their reconstruction resulted in. This would seem like an obvious result to share, especially in the  
335 context of discussing the number of chromosomes in extant lampreys.

336 It was already written in the main text. "In the present study, we have generated the first  
337 reconstruction of the proto-cyclostome genome by combining lamprey segments ... into 104  
338 proto-cyclostome chromosomes ..."

339 **###S47:** Page 8, line 8: I suggest changing "obtained" with "produced".

340 Revised as suggested.

341 **###S48:** Page 8, lines 10-11: It's not clear here that the authors are describing their newly  
342 sequenced/assembled elephant shark genome. Highlight the fact that this genome assembly is  
343 new to this study.

344 We added "our newly sequenced" as suggested.

345 **###S49:** Page 8, line 13: Change "confirmation" with "support", or "additional support".

346 Changed to "additional support".

347 **###S50:** Page 8, line 13-14: It was not the "proto-gnathostome" lineage that underwent the two  
348 tetraploidizations. At least 1R occurred in a "proto-vertebrate". The authors found the evidence of  
349 1R/2R in their "proto-gnathostome" genome reconstruction, but 1R occurred earlier. The authors  
350 should also be very clear to describe that 2R occurring in the lineage leading to gnathostomes is a  
351 new finding of this study.

352 We revised the text as "The reconstruction provided additional support for the previous finding of  
353 two rounds of tetraploidization between the proto-gnathostome and its invertebrate ancestor."  
354 Whether or not 2R is gnathostome-specific is not mentioned here, because we are not discussing  
355 the timing of gnathostome-cyclostome divergence at this point of the manuscript. The evidence of  
356 gnathostome-specific rearrangements occurring between 1R and 2R is discussed later in the  
357 manuscript.

358 **###S51:** Page 8, lines 13-14: "The proto-gnathostome lineage" could be a confusing term. If the  
359 time estimates for 1R and 2R that have been done previously are mostly correct, then it's not at all  
360 certain that crown gnathostomes had emerged by the time 2R happened. A key fossil to date this  
361 node is the (likely) lobe-finned fish Guiyu at approximately 420 million years ago. The earliest fossil  
362 showing a bony jaw is the placoderm Entelognathus, a likely stem gnathostome also dated at  
363 approximately 420 Mya. This marks the minimum age of gnathostomes. The maximum age of  
364 gnathostomes is more difficult to estimate, but is bounded by the emergence in the fossil record  
365 of ostracoderms, at approximately 468 Mya. This time window overlaps with the suggested ages



366 for 2R, but again it is not at all clear that crown gnathostomes had emerged at this point.  
367 Therefore, I think that it would be more accurate to write “the lineage leading to extant  
368 gnathostomes” instead of “the proto-gnathostome lineage”.

369 We thank Reviewer 1 for this information. We are aware of the problem regarding the usage of  
370 ‘proto-vertebrate’, ‘proto-cyclostome’ and ‘proto-gnathostome’. However, we also think that it  
371 will cause more confusion if we decide to avoid using those convenient terms. For example, it  
372 might be more accurate if we change the title to “Reconstruction of genomes of the lineage  
373 leading to extant vertebrates, the lineage leading to extant cyclostomes and the lineage ...”, but it  
374 is not helpful for most readers. We decided to call them proto-vertebrate, proto-cyclostome and  
375 proto-gnathostome, and we believe this slight abuse of words is helpful for most readers.

376 **###S52:** Page 8, lines 16-22: This paragraph about microchromosomes seems to interrupt the flow  
377 of the text. Perhaps it could be shortened and moved down to the following paragraph, after “...  
378 even after ~450 million years of gnathostome evolution.” The first sentence of the paragraph  
379 ““Analysis of the proto-gnathostome genome also revealed...””) could then be removed.

380 We kept the two paragraphs separate: one for the background information and the other for the  
381 results of our reconstruction analysis (also see a comment from Reviewer 2 [Comment 11]).

382 **###S53:** Page 9, line 17: Add comma after “hypothesis”.

383 Revised as suggested.

384 **###S54:** Page 9, line 18: I suggest “... high density of genes (**including ohnologs**) in the proto-  
385 gnathostome chromosomes...”

386 Revised as suggested.

387 **###S55:** Page 9, lines 16 and 18: Ohnologs are mentioned, but there is no description in the main  
388 text of the paper, however brief, of how ohnologs were identified/predicted or differentiated from  
389 other forms of orthologous genes. There is a good description in the supplementary information,  
390 but the main text of the paper should give some understanding of this. Especially because it is  
391 mentioned in the introduction that “our reconstructions serve as a reliable reference for accurate  
392 annotation of ohnologs.”

393 We used the paralogs described in Supplementary Information Section 2.

394 **###S56:** Page 9, lines 22-24: This sentence is tricky to follow I suggest - “The timing of  
395 gnathostome-cyclostome divergence relative to the two basal vertebrate tetraploidization events  
396 (i.e. 1R and 2R) remains an unresolved issue in the field of vertebrate **genome** evolution. Remove  
397 the reference to 1R/2R occurring in “proto-gnathostome lineage”. This is incorrect. See also my  
398 comment above regarding “the lineage leading to extant gnathostomes” rather than “the proto-  
399 gnathostome lineage”.

400 Revised as suggested.

401 **###S57:** Page 9, line 24-25: I suggest “we searched **our reconstructions of the proto-vertebrate...**”

402 Revised as suggested.

403 **###S58:** Page 9, line 27: Remove the parentheses and insert a comma after “models”.  
404 Revised as suggested.

405 **###S59:** Page 9, line 32: I suggest “... before 2R, **but after 1R.**”  
406 The evidence of post-1R divergence is not discussed yet at this point in the manuscript.

407 **###S60:** Page 10, line 2: Regarding the text in parentheses, “or diverged even before 1R”. This is a  
408 much bigger discussion and should not be relegated to a parenthesis. If this were true, then the  
409 authors’ own proposed scenario would be consistent with independent 1R events in cyclostomes  
410 and the lineage leading to gnathostomes. What in their results, and indeed in previously published  
411 studies, suggests that this is a possibility? To the best of my knowledge, the evidence points away  
412 from this conjecture.  
413 We discussed the evidence of post-1R divergence later in the manuscript, so we wrote the phrase  
414 here to show that we considered all possibilities and alternative scenarios. However, the phrase  
415 confused multiple reviewers, and thus we deleted “or diverged even before 1R”.

416 **###S61:** Page 10, line 5: When the authors write “we performed a gene-tree analysis”, it gives the  
417 faulty impression that the authors created these gene trees themselves. In fact, the authors have  
418 analyzed automatically generated Ensembl gene trees. This is a possible weak point in the  
419 analyses, so the authors should clearly describe what they have done.  
420 We clarified the text by revising it to say “we performed an analysis based off Ensembl gene  
421 trees”. We inserted lamprey genes into the existing gene trees downloaded from Ensembl, as  
422 explained in Supplementary Information Section 5. We described it as a gene tree analysis. In our  
423 view, Ensembl Compara is one of the most comprehensive databases for comparative genomics,  
424 and, though not infallible, they are based on genes from many vertebrate and outgroup  
425 invertebrate species.

426 **###S62:** Page 10, lines 10-22: This section is very difficult to follow. It seems like a substantial part  
427 of the description of results and the arguments are missing. The authors state **that** they arrived at  
428 certain conclusions, but it is not at all clear to the reader **how or why** they arrived at these  
429 conclusions. Not all of the argumentation should be left to the supplementary text. For example,  
430 on line 11 the authors describe “homeologous proto-gnathostome and proto-cyclostome  
431 chromosomes”, but calling them homeologous is a conclusion in itself. How did they arrive at this.  
432 The duplicated chromosomes were inferred by our reconstruction method (so duplicated  
433 chromosomes are results). The discussion that those duplicated chromosomes were created by  
434 polyploidization (and not by segmental duplications or by chromosome-wise duplications) was  
435 already written in preceding texts in the manuscript.

436  
437 The following subclause, “seemingly suggesting a contradictory model...” is very unclear. How  
438 could both quadruple and sextuple chromosomes arise at the same time? I think they authors  
439 simply suggest that this is evidence for a shared tetraploidization at the base of vertebrates, i.e.  
440 1R. How is this a “contradictory model”? Contradictory to what? It is near impossible to distinguish  
441 between paralogs generated in 1R and those generated in 2R (although the authors have made a

442 good attempt at dating them by analyzing Ensembl gene trees), but a large amount of 1R  
443 generated paralogs shared between gnathostomes and cyclostomes is not contradictory to  
444 independent chromosomes rearrangements in each of the lineages. Or have the authors been able  
445 to date the paralogs so precisely that this set of paralogous genes includes both 1R- and 2R-  
446 generated paralogs? Also, be sure to clarify that the hypothesis of 2R being a gnathostome-specific  
447 event is based on **their** result and this study. The fact that 2R might be gnathostome-lineage-  
448 specific doesn't necessarily mean that it is a **later** event. The estimations of time-points for 2R, the  
449 emergence of crown gnathostomes, and the gnathostome-cyclostome divergence all overlap, and  
450 the authors have not done a time-estimate calculation of their own.

451 We simplified this paragraph because multiple reviewers did not understand the text. See also  
452 [Comment 18] from Reviewer 2.

453 **###S63:** Page 10, line 17: Add "the" before "establishment".

454 Revised as suggested.

455 **###S64:** Page 10, line 19: I would suggest that polyploidization through hybridization is common  
456 "to some extent" in animals.

457 Revised as suggested.

458 **###S65:** Page 10, line 27: Here is another reference to 18 ancestral chromosomes when it should  
459 be 17 (see general comment above).

460 Please see our reply to Reviewer 1's general comment.

461 **###S66:** Page 11, lines 2-3: ", which can be explained by allotetraploidization" is a repetition and  
462 can be removed.

463 Revised as suggested.

464 **###S67:** Page 11, line 2: Add the indefinite article "A" to "A comparison with modern..."

465 Revised as suggested.

466 **###S68:** Page 11, line 9: Another reference to 18 ancestral chromosomes. Also, the formula  
467  $18 \times 2 \times 3$  can be misleading. It's not clear here that "x2" refers to 1R.

468 We cannot think of any better expressions, and the description was clear enough for Reviewer 1 to  
469 correctly guess that  $\times 2$  refers to 1R.

470 Also, the authors have not revealed how many proto-cyclostome chromosomes their  
471 reconstruction ended up in. Was it as neat as  $18 \times 2 \times 3 = 108$ ?

472 As already written in the main text, 104 proto-cyclostome chromosomes were reconstructed.

473 If so, they should mention very clearly, somewhere in the text, whether their estimation of the  
474 number of proto-cyclostome chromosomes was constrained by the 18 (17, really) proto-  
475 vertebrate chromosomes they had already reconstructed.

476 We already discussed the proto-cyclostome chromosome number in the main text and in Figure 3.

477

478 **###S69:** Page 11, line 16: “Evolutionary hexaploidy” is not an accepted term and could be  
479 confusing. Simply removing “evolutionary” would clear it up. Alternatively, I suggest something  
480 like “There are several documented examples of hexaploidy giving rise to new evolutionary  
481 lineages”.

482 Revised as suggested.

483 **###S70:** Page 11, lines 25-26: The authors of this study are not the first to suggest this. See  
484 Vertebrate evolution by interspecific hybridization – are we polyploid? by Jürgen Spring in FEBS  
485 Letters 400, 2–8, 1997, for an early-ish example. They are not the first to suggest that  
486 hybridization played a role at the early stage of vertebrate evolution. In more general terms,  
487 hybridization has been part of the discussion since Susumu Ohno’s time - he writes about it in the  
488 “Mechanisms of Gene Duplication” chapter of Evolution by Gene Duplication in reference to both  
489 auto- and allo-tetraploidy, and he mentions triploidy, though he does write that “Such an  
490 interesting oddity, however, is a side issue of vertebrate evolution.” At this point of the paper, the  
491 authors should perhaps temper their discussion to reflect the long ongoing discussion surrounding  
492 the role of hybridization in polyploidization and the origin of vertebrates. In the supplementary  
493 text, the authors contrast “their” hybridization scenario against the “octaploidy hypothesis”. This  
494 makes a neat and tidy way to launch hybridization as a new hypothesis, but it has in fact been  
495 discussed previously. What’s exciting about this paper, is that it adds evidence to this ongoing  
496 discussion.

497 We were aware of previous discussions of allo-polyploidization in previous papers, but we didn’t  
498 cite those papers in the initially submitted manuscript. We added citations in the main text.

499 **###S71:** Page 12, lines 2-4: This sentence highlights an issue with this whole section of the  
500 discussion: suddenly the authors are describing the proto-gnathostome genome rather than the  
501 proto-vertebrate genome... Do they mean to say that only 2R, and not 1R, was an  
502 allopolyploidization event? Why not 1R? This is especially confusing since the authors started the  
503 section talking about the proto-cyclostome genome and hexaploidization. It should be **abundantly**  
504 clear which tetraploidization events they are referring to.

505 We started the paragraph by mentioning polyploidization events in early vertebrate lineages  
506 including the proto-cyclostome and proto-gnathostome. We first mention the cyclostome-specific  
507 whole-genome triplication and then we move on to 2R.

508 **###S72:** Page 12, line 2: I would change “shows” to “suggests”.

509 Revised as suggested.

510 **###S73:** Page 12, lines 10-11: I suggest “... throughout most gnathostomes, **[comma]** including  
511 cartilaginous fishes, but are **missing** in invertebrates, **[comma]** including the closest relatives **of**  
512 **vertebrates**, such as **tunicates** and amphioxus.”

513 Revised as suggested.

514 **###S74:** Page 12, line 13: Add a comma after “events”.

515 Revised as suggested.

516 **###S75:** Page 12; lines 30-31: It's not clear whether MHC, NKC and LRC were located on **different**  
517 microchromosomes or the same microchromosome. The authors write about cis-preserved genes  
518 on the next page (line 2), but the context we are in as readers is tetraploidizations, which suggests  
519 different chromosomes... The authors use microchromosomes in plural on page 12, line 31.  
520 In this discussion, we are interested in a possibility of asymmetric contribution from one of the  
521 two subgenomes in the proto-gnathostome genome. We revised Figure 6 to clarify that MHC, NKC  
522 and LRC were located on different microchromosomes in the proto-gnathostome genome. Figure  
523 6 suggests that the precursor of MHC, NKC and LRC might have emerged from one of the two  
524 subgenomes.

525 **###S76:** Page 12, line 30 - page 13, line 7: The authors have traced the **locations** where there  
526 would be MHC, NKC and LRC genes back to early vertebrate evolution, but are there any  
527 indications that the genes themselves were present at this time? After 1R? After 2R in  
528 gnathostomes?  
529 A recent study discussed the origins of those immune complexes, and argued that those  
530 complexes have emerged through 1R and 2R [Ohta et al., J Immunol, (2019)].

531 **###S77:** Page 13, lines 9-22: I think this section is overstated. See my comment above regarding  
532 page 5, lines 14-16. The fact that some ohnologs are human disease genes is underwhelming. Of  
533 course they are. There are many more that are **not**. The studies the authors have cited are more  
534 concerned with dosage issues in anciently polyploid genomes such as ours, and that when those  
535 dosages in the re-diploidized genomes are perturbed, by copy-number variations for example,  
536 they may result in disease. This is interesting in terms of genome evolution and the constraints  
537 upon genome structure and evolution, which are revealed when disease arises. In these terms,  
538 there is a connection to the present study, and this study adds to the knowledge about constraints  
539 on genome evolution. But from there it is a big step to say that this study has "implications for  
540 understanding human genetic diseases", which suggests implications for disease origins, disease  
541 progression or even disease treatments. Please restate this section, and the section at the end of  
542 the introduction on page 5, in terms of constraints on genome evolution, rather than by linking it  
543 to human disease.  
544 See our response to Reviewer 1's [Comment09].  
545

546 **###S78:** Page 13, lines 28-32: Several statements in this concluding section need to be tempered  
547 down a bit. On line 28 - "contentious" is perhaps a bit strong. I suggest "our reconstructions  
548 address several unresolved issues". Regarding "the origin of the adaptive immune system", the  
549 authors have provided a brief and very general discussion about the evolution of the adaptive  
550 immune system. This statement should be understated somewhat. The reference to human  
551 diseases should be left out.  
552 We replaced contentious with important. We don't think it is an overstatement to say that our  
553 reconstruction offers a unique evolutionary perspective to the origin of adaptive immune system.  
554 See Comment S75 above to clarify the confusion by Reviewer 1.

555 **###S79:** Figure 1: Most of the figure caption is not relevant for the graphical interpretation of the  
556 figure. If the results or the methodology are not described well enough in the main text, change  
557 the main text instead of adding this much information to the figure caption. For example, the  
558 whole section between lines 2-8 should be removed (“We reconstructed the...”).  
559 We moved the text (“We reconstructed the ...”) to the main text.

560 The final sentence of the legend also does not belong here.  
561 We moved the sentence to the figure title and the main text.

562 The caption can be shortened further by changing to “The *Trichoplax* and **elephant shark** scaffolds  
563 were sorted...” to avoid repetition.  
564 Revised as suggested.

565 As for the figure itself, it would be useful if the 17+PvcUn chromosomes were enumerated in the  
566 y-axis.  
567 We added chromosome labels on the y-axis.

568 **###S80:** Figure 2: It should be clear that the figure shows examples and not the full data. Again,  
569 there is some confusion of terms between scaffolds, segments, subgroups and chromosomes. I  
570 suggest the following to perhaps clarify this - “Japanese lamprey scaffolds (a) were correlated with  
571 proto-vertebrate chromosomes (Pvc). Scaffolds corresponding to Pvc3 are shown in blue and to  
572 Pvc17 are shown in green. Segments of conserved synteny from the lamprey scaffolds were  
573 clustered into proto-cyclostome chromosomes (b) based on the distribution of paralogs vs.  
574 orthologs. The triangular plot (c) is a 45-degree-rotated graph of the paralog distribution **between**  
575 the 12 proto-cyclostome chromosomes that correspond to Pvc3 and Pvc17. This shows...”  
576 We did mention that our reconstruction is presented in Figure 3 (Fig. 2 in the initially submitted  
577 manuscript) partly. The text was revised as follows: “(a) Japanese lamprey scaffolds are illustrated  
578 with the scaffold IDs. These scaffolds were partitioned into segments of conserved synteny, and  
579 segments corresponding to proto-vertebrate chromosome Pvc3 (blue) and Pvc17 (green) are  
580 shown for illustrative purposes. (b) Groups of segments of the same color were organized into  
581 several subgroups representing proto-cyclostome chromosomes based on the distribution of  
582 paralogs and orthologs. (c) The triangular plot is a 45-degree-rotated graph of the paralog  
583 distribution between the 12 proto-cyclostome chromosomes that correspond to Pvc3 and Pvc17. ”

584 The description of the multiplicity table is too long, and most of it is not relevant for the graphical  
585 interpretation of the figure. The figure caption is already too long.  
586 We deleted two sentences.  
587

588 **###S81:** Figure 3: There is too much description of results and discussion in the figure caption that  
589 is not necessary for the graphical interpretation of the figure. The whole section starting “The  
590 segment lengths are longer in human...” and ending “... and the large macrochromosomes” does  
591 not belong in a figure caption. The same is true for “In general, smaller proto-gnathostome  
592 chromosomes [...] and large chromosomes with low gene densities” and “As in the gene density

593 plot [...] with high ohnolog densities.”

594 We moved the texts to the main text.

595 There is also some confusion between “segment length” and “chromosome size” for this figure.

596 The definition of “segment” should be abundantly clear in the main text as well as the figure  
597 caption.

598 Reconstructed chromosomes consist of multiple segments and the chromosome size is the total  
599 segment length. We revised the text as follows: “Each proto-gnathostome chromosome, consisting  
600 of multiple segments, was mapped to modern genomes, and the total segment length in the  
601 human genome is shown on the x-axis, whereas the total segment length in the chicken, spotted  
602 gar and elephant shark genomes are shown on the y-axis.”

603 **###S82:** Figure 4: I don’t think the authors should include PvcUn in the evolutionary scenario, nor  
604 mention 18 (rather than 17) ancestral chromosomes in the caption. PvcUn is a construction of  
605 many small sections with weakly conserved syntenies that likely “belong” in other chromosomes.  
606 It’s a “waste basket” construction, if I’ve understood their methods correctly. The inclusion in the  
607 evolutionary schematic gives the wrong impression that it represents a pair of ancestral  
608 chromosomes. The grey areas that correspond to PvcUn can be left in the images of the modern  
609 genomes, if it’s clearly described in the caption that the grey color corresponds to PvcUn regions.  
610 We decided to present PvcUn as one of 18 proto-vertebrate chromosomes, because (1) it is the  
611 output of our reconstruction method; (2) it has macrosynteny conservation in the scallop genome;  
612 and (3) there is one-to-one correspondence with a chromosome reconstructed by Sacerdot et al.  
613 Please see our response to Reviewer 1’s [Comment 04].

614 How strong are the conserved syntenies that indicate that elephant shark scaffold 25 and chicken  
615 chromosome 24 are derived from PvcUn? If it’s only a handful of genes, I would at the very least  
616 mark these as striped and not completely filled in with grey color.

617 See Figure S7.

618 **###S83:** Figure 4: The authors have not included any rearrangements or drawn lines between the  
619 proto-cyclostome chromosomes and the extant lamprey chromosomes.

620 It would make the figure too complicated.

621 It’s difficult to see the evidence of the hexaploidization in the lamprey genomes otherwise.

622 The evidence is presented as Figure. 3. Illustration of all lamprey scaffolds does not indicate paleo-  
623 hexaploidization by itself.

624 If the reader doesn’t have any sort of Then why include the lampreys at all?

625 It visually shows rearrangements in the lamprey lineages. This is important because conclusions in  
626 previous studies (including the 1R-plus-segmental-duplication model) might have been affected by  
627 such lineage specific rearrangements, and this is why we need the proto-cyclostome  
628 reconstruction to conclusively resolve the contentious issues in the early vertebrate genome  
629 evolution.



630 **###S84:** Figure 4: The caption suggests that all macrochromosomes in extant gnathostomes  
631 resulted from the chromosome fusions that preceded 2R, and that all chromosomes that didn't  
632 fuse resulted in microchromosomes. How can this be?  
633 This is a misunderstanding. We mean that a pair of fusion chromosomes became a  
634 macrochromosome and a microchromosome by biased fractionation. We revised Figure 6 (Fig. 4 in  
635 the initially submitted manuscript) to clarify which chromosomes belong to which subgenome.

636 In this figure alone I can see that, for example, chromosome 14 in humans, arguably a  
637 macrochromosome, is derived mostly from a Pvc17-derived proto-chromosome, which did not  
638 experience any fusions. Even if all macrochromosomes are derived from ancestral chromosome  
639 fusions, surely not all fusions occurred at the base of vertebrates?

640 We apologize the lack of sufficient description of the graphical interpretation of the figure.

#### 641 **Detailed comments on Supplementary Information:**

642 **###S85:** Page 4, line 5: What was the origin of this elephant shark? The geographic area where it  
643 was caught, but also the conditions by which it was caught. The elephant shark is classified as a  
644 "Least Concern" species by the IUCN (<https://www.iucnredlist.org/species/41743/68610951>), but  
645 it occurs within protected areas, and there are conservation plans in place across its entire  
646 geographical range, so this information is important. This information also provides additional  
647 assurance that the right species has been used.

648 The adult elephant shark was collected by the senior author in Hobart, Tasmania, Australia where  
649 this species is captured regularly on a commercial scale. Annually up to 114 tons of elephant shark  
650 capture is permitted (<https://www.afma.gov.au/fisheries-management/species/elephant-fish>) in  
651 Australia (and a comparable quantity is caught in New Zealand). If you order Fish & Chips in  
652 Hobart, the chances are you will be eating elephant shark (sold as elephant fish or white fish) with  
653 the chips. There are only three species of *Callorhinchus* in the world, with one species found each  
654 in Australia/New Zealand, Africa and South America. Therefore, there is no confusion regarding  
655 the identity of the species. We had mentioned the source of the elephant shark in our 2007 *PLoS*  
656 *Biol* paper (Venkatesh et al., 5: e101) and have used DNA from the same individual for all our  
657 publications so far, including the present paper. We have now mentioned the source of the  
658 elephant shark in the Supplementary Information.

659 **###S86:** Page 11, line 5: The same as above for the Arctic lamprey. How was this animal procured  
660 and from which geographic range? In America, the Arctic lamprey could co-occur with the closely  
661 related Alaskan brook lamprey (*Lethenteron alaskense*), and in Asia it co-occurs with the  
662 FarEastern brook lamprey (*Lethenteron reissneri*). The Siberian brook lamprey (*Lethenteron*  
663 *kessleri*) is sometimes classified as a sub-species of the Arctic lamprey.

664 The Japanese lamprey (aka Arctic lamprey) was collected by the senior author from the Ishikari  
665 River, Hokkaido, Japan during the breeding season. In the course of genome sequencing, we have  
666 also determined the complete mitochondrial genome sequence and it shows 99.78% identity to  
667 the mitochondrial genome of *Lethenteron camtschaticum* in GenBank (accession number



668 KF701113.1). Thus, there is no ambiguity regarding the identity of the species. We have now  
669 mentioned the source of the Japanese lamprey in the Supplementary Information.  
670

671 **###S87:** Page 12, line 5: How does this genome size compared with the previously publishes  
672 genome assembly of the Arctic lamprey? And of the latest assembly of the sea lamprey?

673 The genome size of the Arctic lamprey has not been previously estimated. The previously  
674 published genome assembly of the Arctic lamprey (Mehta et al., PNAS 2013) spanned 1.03 Gb.  
675 The closest species with an estimated genome size is *Lethenteron appendix* (1.4 pg; see Animal  
676 Genome Size Database). The estimate genome size of *Lampetra fluviatilis* is 1.4 pg. These values  
677 are close to our estimated genome size of the Japanese lamprey (1.43 Gb). The estimated genome  
678 size of the sea lamprey is 2.3 Gb (Smith et al. Nature Genetics, 2013) and its latest published  
679 assembly measures 1.1 Gb.

680 **###S88:** Page 14, lines 21-24: Were these TRINITY transcriptome assemblies from the same  
681 individual as the genome assembly? It's not clear whether these transcriptome efforts were part  
682 of the same genome project described in this paper. This should be made clear in the text. The  
683 Institute of Molecular and Cell Biology at A\*STAR is cited as the source of the RNA-Seq reads in the  
684 BioProjects database, which is the home institute of several of the authors.

685 No, not all TRINITY transcriptome were from the same individual. The transcript assemblies were  
686 generated previously in the senior author's laboratory as part of other projects (Parahox gene  
687 family, Nav channel genes, etc.). We have now specified accession numbers for all the mentioned  
688 tissues.

689 **###S89:** Page 18, lines 1-9: The methods described in this paragraph are not entirely clear. For  
690 example, "We obtained orthologs and paralogs from gnathostome species..." What does this entail  
691 specifically? What kind of dataset was obtained from Ensembl? Sequences? Spreadsheets with  
692 annotation IDs and locations etc?

693 Protein-coding sequences, their positional information, Ensembl Compara gene trees and  
694 alignments were obtained from Ensembl.

695

696 How were these obtained from gene trees? Usually Ensembl datasets are obtained through  
697 BioMart. Was the complete set of gene trees in Ensembl 75 downloaded?

698 All trees for protein-coding genes (Compara.75.protein.nhx.emf.gz) were downloaded.

699

700 If so, this dataset must have included much more data than only phylogenetic data. For example, it  
701 must have included some of the annotation data created by Ensembl, because the authors  
702 mention that they looked at whether gene duplicated were annotated as Vertebrata, Euteleostomi  
703 or Clupeocephala.

704 Yes.

705

706 Were the trees simply analyzed visually on the Ensembl website? This would be a monumental

707 task.

708 We check gene trees visually/manually on the Ensembl website only when we are interested in  
709 specific genes. (We don't describe manual browsing as analysis.)

710

711 [If only some Ensembl gene trees were analyzed, how were they selected for analysis.](#)

712 We did not write that only some trees were analyzed. We analyzed all protein-coding gene trees.

713

714 [How was the tree data analyzed specifically?](#)

715 We processed the NHX format trees (Compara.75.protein.nhx.emf.gz).

716

717 [The authors write, for example, that small-scale duplicates were discarded. What does this entail  
718 specifically?](#)

719 Paralogs were identified as follows. First, a gene pair was retained if their duplication node (i.e.  
720 their divergence point) was annotated as Vertebrata, Euteleostomi, or Clupeocephala. Second, if  
721 at least one of the two paralogous genes experience additional "small-scale" (as distinct from  
722 whole genome) duplications, such as mammalian-specific duplications, the pair was discarded. We  
723 want to discard genes affected by small-scale duplication events, because we cannot tell the  
724 original gene position if the gene was affected by segmental duplication etc.

725

726 [What did their final dataset consist of? What kind of data?](#)

727 Please see Supplementary Data 1.

728

729 [So much of the final evolutionary scenario hinges on these analyses, but I haven't been able to  
730 scrutinize it to the level I would like to because I don't find the information. For example, the  
731 analyses hinge on identifying whether gene duplicates are paralogs, but I can't see how the  
732 authors have identified that two genes are duplicates to begin with. How did they positively  
733 identify duplicates, specifically.](#)

734 If two genes in a tree come from the same species, they are duplicates. We chose duplicates that  
735 were annotated in Ensembl as Vertebrata, Euteleostomi, or Clupeocephala, because we are  
736 interested in WGDs. We note that it is a misunderstanding that our entire analysis hinges on the  
737 accurate annotation of paralogs. We developed a probabilistic macrosynteny model so that the  
738 reconstruction is not affected too much from random annotation errors, local segmentation  
739 errors, etc. (see [Nakatani and McLysaght, *Bioinformatics* (2017)] for more details). Please also see  
740 our response to Reviewer 1's [Comment 08].

741

742 [In general, it would be valuable if the authors described exactly how many orthologs vs. paralogs  
743 they identified and included in their dataset. I would also urge the authors to share these datasets  
744 either as a supplementary file with the publication or in an online repository, if possible. Unless  
745 this data includes tens or even hundreds of thousands of genes, then I would understand it is not  
746 feasible. However, it would be especially relevant for the elephant shark reciprocal BLASTP  
747 searches described on page 18, lines 7-9, because it would be important to know how many  
748 orthologs they identified, and as a reader I would like to review this list to make sure that the](#)

749 orthology assignments were (mostly) correct. This also goes for the amphioxus/human and  
750 lamprey/gnathostome ortholog searches described further down on the page. If it's not feasible to  
751 share the resulting datasets, at least describing the searches in more detail would help give the  
752 reader an indication of what the results were like.

753 Please see Supplementary Data 1.

754

755 Because, in addition, it is not clear against which datasets/databases the BLASTP-searches  
756 described on this page were done. For example, "We performed BLASP search[es] for all species  
757 pairs, and identified orthologs and paralogs..." What species pairs? Which gene dataset was used  
758 as queries and which datasets/databases were searched?

759 We revised the text as follows: "We performed BLASTP searches for all species pairs (with  
760 vertebrate genes as query sequences and invertebrate genes as subject sequences), and identified  
761 orthologues and paralogues ..."

762

763 I understand the logic of simply using the top 2 or 4 scoring genes for the BLASP searches, but  
764 there is a large potential for mis-matches. I would like at least the possibility to quickly scan the  
765 resulting orthology/paralogy assignments to verify, or at the very least know which datasets were  
766 used as queries and which ones were searched in order to ensure reproducibility.

767 We submit the dataset as Supplementary Data 1.

768 **###S90:** Page 18, line 29: What search were these bit-scores derived from. Describe the procedure  
769 clearly.

770 They were derived from an all-vs-all BLASTP search among the Japanese lamprey protein  
771 sequences.

772 **###S91:** Page 18, line 29: All three conditions or only 1 or 2 of them? It's not clear.

773 It's clear. When only one or two conditions are satisfied, we don't say three conditions are  
774 satisfied.

775 **###S92:** Page 18, line 30: Describe that lamprey vs. amphioxus BLASTP searches were done earlier  
776 in this section. Does this refer to the same BLASTP search as the lamprey gene pair bit-scores in  
777 the preceding line? The following line also seems to refer to BLAST-searches against sea lamprey  
778 genes...?

779 BLASTP searches were performed between all species pairs, as described in Section 2.1. We added  
780 a subsection describing orthologues between the sea lamprey genes and the Japanese lamprey  
781 genes: "We performed a BLASTP search between the sea lamprey genes (query) and the Japanese  
782 lamprey genes (subject) and defined reciprocal best hits as orthologues."

783 **###S93:** Page 18, line 26 - page 19, line 8: This section describes the annotation of lamprey paralog  
784 genes. It is logical that the authors would consider paralogous gene pairs in lamprey, as described  
785 on page 18, lines 19-29. But it is not clear from this section, nor from the main text of the paper,  
786 how paralogous gene **pairs** helped identify **hexaploidization** in cyclostomes.

787 See Figure 3 and Supplementary Information Section 3.3.

788 I understand that the **distribution** of gene pairs across three ancestral chromosome pairs would  
789 still indicate hexaploidization, but if this was the authors' thinking, it should be better described.  
790 Three paralogous proto-cyclostome chromosomes are not enough as evidence of hexaploidization.  
791 We did not write that three paralogous proto-cyclostome chromosomes are evidence of  
792 hexaploidization because we did not think in that way.

793 The information I miss from this section is whether any gene **triplets** were identified, and if so,  
794 how many?

795 Gene triplets are included, but the number of paralogous genes in a gene family is not a good  
796 indicator of the number of WGD events. That's why we need reconstructions.

797 **###S94:** Page 19, lines 2-5. I don't understand this reasoning at all. Please clarify. It is not clear  
798 what "the pair" are, or what "either of the lamprey genes" refers to.

799 A pair of Japanese lamprey genes were defined to be paralogs if "the pair" satisfies Conditions 1, 2  
800 and 3. We revised "the pair" to "the gene pair".

801 Remove the parenthesis around "We retained seven paralogs..."

802 Revised as suggested.

803 Also, clarify that the expectation of three rounds of WGD (1R, 2R and a cyclostome-specific WGD)  
804 is the hypothesis that they were working with based on the previous suggestion in Mehta et al.  
805 (2013). It's important to highlight this because the actual scenario that this study resulted in is  
806 different! One WGD (1R) and one hexaploidization! The maximum expected number of paralogs  
807 after 1R and then a cyclostome-specific hexaploidization would be  $1 \times 2 \times 3 = 6$ ? At first I was  
808 confused because I thought the authors were referring to the latter, not the initial hypothesis.  
809 Why 7 though, and not 8?

810 We retained seven matches because we excluded self matches. We revised the text and wrote  
811 that seven paralogs were expected if we assume three rounds of WGD. We retained eight paralogs  
812 because if we retained only five paralogs for each gene, then readers might think that the analysis  
813 is biased and hexaploidization is an artefact of the assumed number of paralogs. In fact, allowing  
814 slightly larger numbers of paralogs result in only additional random noise, which do not have much  
815 influence on our reconstruction. The reconstruction algorithm is tolerant to random noise if there  
816 are stronger signals.

817 **###S95:** Page 19, lines 13-15: This section is similarly confusing. What does "the elephant shark  
818 gene pair" and "neither of the elephant shark genes" refer to?

819 We replaced "the" with "an".

820 **###S96:** Page 21, line 3 (below the algorithm): I suggest "**the** proto-vertebrate genome".

821 Revised as suggested.

822 **###S97:** Page 21, line 4: Clarify **which** lamprey genome.

823 We replaced "genome" with "genomes".

824 **###S98:** Page 21, line 4: When the authors write simply “comparing the lamprey genomes with  
825 each other and also with four gnathostome genomes...” it reads like they are not explaining  
826 further what these comparisons entail. It is not immediately clear that they are referring to the  
827 sections that follow (3.2.1, 3.2.2 etc). Please clarify.

828 We added “These steps are described below.”

829 **###S99:** Page 23, line 2-2: “The reconstruction with  $K = 18$  was the most significant.” Could the  
830 authors please share the full results of this? What was the significance **value** of  $K = 18$ ? What  
831 values did other  $K$ s produce?

832 The table shows the significance for  $K=10, \dots, 20$ . We added this table in Supplementary  
833 Information.

| $K$ | $\log(\mathbb{P}(X \geq x))$ |
|-----|------------------------------|
| 10  | -8363.48                     |
| 11  | -9003.43                     |
| 12  | -9438.88                     |
| 13  | -9705.24                     |
| 14  | -9958.95                     |
| 15  | -10079.3                     |
| 16  | -10182.1                     |
| 17  | -10508.8                     |
| 18  | -10767.3                     |
| 19  | -10371.5                     |
| 20  | -10249.1                     |

834

835 **###S100:** Page 23, line 14-15: “Syntenic to” does not mean what the authors mean here. Syntenic  
836 means that two genes are located on the same chromosome. I suggest “**A comparison of**  
837 **conserved synteny between these proto-vertebrate chromosomes and the scallop genome**  
838 **shows that Pvc17, PvcUn, Pvc8, and Pvc9 correspond to individual scallop chromosomes -**  
839 **chromosomes 3, 13, 6 and 4** respectively.”

840 Revised as suggested.

841 **###S101:** Page 23, line 18: It’s not clear what the authors mean by “in early invertebrate lineages”.  
842 Early invertebrates as in at the base of the metazoan lineage (this is very very early), or early as in  
843 already in an invertebrate ancestor or extant chordates/vertebrates.

844 The common ancestor of vertebrates and scallop, and also *Trichoplax* to some extent.

845 **###S102:** Page 23, line 18: I’m still not certain that PvcUn actually represents an ancestral  
846 chromosome. Clearly, there is not perfect correspondence between the proto-vertebrate genome  
847 reconstruction and the scallop genome, as shown in Figure 4. Because the conserved synteny

848 comparison was one-sided, i.e. proto-vertebrate → scallop, it's not possible to differentiate  
849 between rearrangements in the proto-vertebrate or rearrangements in the lineage leading to the  
850 scallop. Doing the analysis the other way, scallop → proto-vertebrate, might show that parts of  
851 scallop chromosome 13 correspond to other Pvc's.

852 Reviewer 1 appears to mistakenly believe that the analysis is one-sided. If we used one-to-one  
853 reciprocal best hits between the scallop genes and the Japanese lamprey genes, then we might  
854 have missed some synteny blocks. In our analysis, however, we identified one-to-multiple co-  
855 orthologs as described in Supplementary Information Section 2.

856 So for a large number of segments of weak synteny conservation (i.e. PvcUn) to show conserved  
857 synteny with a single scallop chromosome is not definitive evidence. Did all the segments of PvcUn  
858 correspond to scallop chromosome 13, or were there segments in PvcUn that could not be  
859 assigned? The authors have not described this. Also, they haven't described how big the conserved  
860 synteny segments that make up PvcUn are. I suspect they are very small, which makes any  
861 conclusions very tentative.

862 As we wrote, the comparison with the previous reconstruction by Sacerdot et al. also supports the  
863 presence of PvcUn (now referred to as Pvc18). One segment has many orthologs on scallop chr13,  
864 but the remaining segments have unclear synteny in the scallop genome.

865 **###S103:** Page 23: It is notable that the authors haven't discussed here why these results are so  
866 different from the previous reconstruction of the vertebrate genome by the first author (Nakatani  
867 et al. *Genome Res.* 17(9), 2007), which reconstructed only 10 ancestral chromosomes. Which  
868 scenario is wrong? Is this completely due to the inclusion of a cyclostome in the reconstruction?  
869 Putnam et al. (2008) didn't include lamprey synteny and still arrived at 17 ancestral (chordate)  
870 chromosomes. I have to ask, also, for the Nakatani et al. (2007) ancestral chromosomes to be  
871 included in Table S8. This would be very useful.

872 The reconstruction by Nakatani et al. (2007) consisted of 10 to 13 chromosomes depending on  
873 rearrangement events occurring between 1R and 2R. We wrote in the initially submitted  
874 manuscript that many segments were assigned to chrUn in [Nakatani et al., *Genome Res* (2007)],  
875 and we found more chromosome fusion events between 1R and 2R than in [Nakatani et al.,  
876 *Genome Res* (2007)]. Putnam et al. did not describe why they chose specific threshold values in  
877 their analysis (although different threshold values result in different numbers of chromosomes).  
878 Genome sequence and annotation versions are different so comparison is not straightforward.

879 **###S104:** Page 24, line 7: It can't hurt to add the binomial nomenclature for the silkworm and sea  
880 anemone as well.

881 Revised as suggested.

882 **###S105:** Page 24, lines 14-15: It is not clear what "assigned scaffolds to **the chromosome** with the  
883 largest number of markers" refers to. The proto-vertebrate chromosomes?  
884 The freshwater snail scaffolds were assigned to snail chromosomes. We added "then".

885 **###S106:** Page 24, lines 18-19: I'm not so sure. This suggests that the patterns of synteny are  
886 conserved, it say nothing of chromosomes themselves. For example, it does not consider  
887 chromosome fissions preceding the time point of the proto-vertebrate reconstruction.  
888 Fissions and fusions result in different ortholog distributions. See for example [Jaillon et al., *Nature*  
889 (2004); Nakatani et al., *Genome Res* (2007); Nakatani and McLysaght, *Bioinformatics* (2017)].

890 What I see in Fig. S3 is that **these particular** conserved synteny patterns, inferred to have existed  
891 in early vertebrate evolution, can be “recreated” **to some extent**, by no means perfectly, in  
892 invertebrate genomes as well. However, genomes are mixes of different patterns, syntenies and  
893 paralogies of different origins, and this study does not address other patterns that may exist in the  
894 invertebrate genomes that may indicate other ancestral chromosome configurations. The analyses  
895 in these studies were done in only one direction, proto-vertebrate → invertebrates. Starting with  
896 another lineage at the outset may reveal other chromosome configurations in the common  
897 ancestor.

898 We don't think the direction from proto-vertebrate to invertebrates affects the conclusion. Please  
899 see previous papers for similar discussions about macrosynteny conservation [Jaillon et al., *Nature*  
900 (2004); Nakatani et al., *Genome Res* (2007); Putnam, et al., *Nature* (2008), etc.].

901 **###S107:** Page 25, line 4: Change to “**have** remained contentious”.  
902 Revised as suggested.

903 **###S108:** Page 25, line 5: Change to “**the** possibility of cyclostome-specific WGD...” I also suggest  
904 removing “intense”, as this is a value judgment.  
905 Deleted.

906 **###S109:** Page 25, line 8: Change to “... WGD, **followed by the** loss of two entire clusters”.  
907 Revised as “WGD followed by the loss of two entire clusters.”

908 **###S110:** Page 25, line 10: Change to “We considered that **a** reconstruction of **the** proto-  
909 cyclostome chromosomes...”  
910 Revised as suggested.

911 **###S111:** Page 25, line 12. Change “comprises” to “comprise”.  
912 Why?

913 **###S112:** Page 25, lines 14-15: Change to “Thus, **the** reconstruction...”  
914 Revised as suggested.

915 **###S113:** Page 25, line 17: Change to “**The** enumeration...”  
916 Revised as suggested.

917 **###S114:** Page 28, line 3: Change to “**in** the proto-vertebrate lineage...”  
918 Revised as suggested.



919 **###S115:** Page 28, lines 2-6: Perhaps this is unrelated, but does it then follow that for the proto-  
920 cyclostome reconstruction the most significant partition was  $6 = 1R$  followed by hexaploidization?  
921 It is related. Please also see Figure 3 for the discussion of hexaploidization.

922 **###S116:** Pages 29-30: The “red/black/white/grey” metaphor is quite long-winded and very  
923 difficult to follow. Please break up and clarify.

924 We revised the text as follows: “Figure 4a illustrates the case of a chromosome fusion occurring  
925 between the two WGD events. As the result of the fusion, the grey post-2R chromosomes share  
926 large numbers of ohnologs with the black and white chromosomes (represented by red regions in  
927 Figure 4c); on the other hand, there are no ohnologs between black and white chromosomes  
928 (white regions). In addition to the case of a chromosome fusion between the two WGD events, our  
929 reconstruction method considered other rearrangement scenarios: namely, (A) a chromosome  
930 fission event occurring in the period between 1R and 2R and (B) a fusion or translocation after 2R.  
931 Scenario A results in the same paralog distribution pattern as in the case of a fusion between the  
932 two WGD events, but the two scenarios can be distinguished by checking the ortholog distribution  
933 in invertebrate genomes. In Scenario B, the paralog distribution is different from the scenario of a  
934 fusion between 1R and 2R. In general, we expect to see a large number of paralogs between a pair  
935 of proto-gnathostome chromosomes, only if the two chromosomes (1) are duplicated  
936 chromosomes or (2) inherit duplicated chromosomes or duplicated segments through  
937 rearrangements (fusions, fissions and translocations). These proto-gnathostome chromosome  
938 pairs are called ‘red chromosome pairs’ (as in Fig. 4c) in the subsequent texts.”

939 **###S117:** Page 31, lines 1-2: Please clarify that the “previous reconstruction” has the same first  
940 author as this study. Otherwise we might get the impression that Dr. Nakatani is (unfairly)  
941 disowning his previous work.

942 The reason we wrote “previous reconstruction” is because it is not appropriate to write “our  
943 previous reconstruction” nor “their previous reconstruction”. We feel that it is clear from the  
944 citation information that the first author is the same person.

945 **###S118:** Page 31, line 5: Regarding the “nine large-scale rearrangements”, I counted nine fusions.  
946 How about fissions?

947 We didn’t find any fissions in the proto-gnathostome genome.

948 **###S119:** Page 31, line 26: Change “fission” to either “**the** fission” or “fissions”.

949 Changed to “fissions”.

950 **###S120:** Page 32, line 10: Change “chromosomes” to the singular “chromosome” or write “For  
951 each of the proto-gnathostome chromosomes...”

952 We thank Reviewer 1 for finding this error.

953 **###S121:** Page 32, lines 22-23: I suggest “These chromosomes underwent **the first** WGD (1R),  
954 [comma] resulting in the **doubling** of the proto-vertebrate **genome**.” Remember that we are  
955 generally talking about the **haploid** genome here. “Doubling” of chromosomes could be



956 misinterpreted as referring to the diploid genome.  
957 Revised as suggested.

958 **###S122:** Page 32, line 23: Change “In the gnathostome lineage” to “In the lineage leading to  
959 extant gnathostomes”, see my comment about page 8, lines 13-14, above.  
960 Revised as suggested.

961 **###S123:** Page 33, lines 6-10: I suggest “**Where** our reconstruction **produced** less than six  
962 chromosomes, the remaining chromosomes **out of the expected six are** shown as hatched bars.  
963 **Where** our reconstruction **produced** more than six chromosomes, the extra chromosomes **are not**  
964 **shown. However,** the extra chromosomes were included in all other figures, **[comma]** including  
965 Figures 1 and 2, although **they are very** small.”  
966 Revised as suggested.

967 **###S124:** Page 33, line 12: Change “Modern” to “Extant”.  
968 Revised as suggested.

969 **###S125:** Page 33, lines 15-16: It seems strange to me that so many, and in some cases extensive,  
970 “white regions” can be explained to be only centromeres. Perhaps if including also  
971 pericentromeric areas, which do contain **some** genes. It’s a small point, but in any case, this is only  
972 a conjecture on the authors’ part. In addition, writing “regions excluded from our reconstruction”  
973 makes it sound like the authors excluded these regions **purposely**, which I don’t think was the  
974 case. I suggest writing “Regions of the human genome **shown in white likely correspond to**  
975 **regions poor in genes, such as centromeres and pericentromeric regions.**”  
976 Revised as suggested.

977 The authors should be careful not to give the false impression that they are showing the complete  
978 chromosomes in their reconstruction (Fig. 4). I don’t see centromeres/pericentromeric regions,  
979 telomeres and other “gene deserts” in the figure. These can be more closely described as  
980 conserved synteny blocks for each of the chromosomes.  
981 The figure presents the correspondence between several extant vertebrate genomes and the  
982 three reconstructed genomes.

983 **###S126:** Page 33, line 26-29: I suggest “... we plotted paralogs among proto-gnathostome and  
984 proto-cyclostome chromosomes **and classified them** into vertebrate **paralogs** (i.e. duplicated in  
985 the common ancestral vertebrate), **cyclostome-specific paralogs, and gnathostome-specific**  
986 **paralogs** as described below.”  
987 Revised as suggested.

988 **###S127:** Page 33, lines 30-31 - Page 34: I suggest removing “Paralogs in the proto-gnathostome  
989 genome were represented by human paralogs obtained from BioMart:” and simply starting the  
990 sentence as follows - “**Human** paralogs annotated as Vertebrata **in Ensembl** were classified as  
991 vertebrate paralogs (blue dots), **[comma]** and **human** paralogs annotated as Euteleostomi were  
992 classified as...”  
993 Revised basically as suggested.

994 **###S128:** Page 34, lines 2-3: I suggest "Figure S9 shows the distribution of vertebrate and  
995 gnathostome-specific paralogs **mapped onto** the **reconstructed** proto-gnathostome genome."  
996 Revised as suggested.

997 **###S129:** Page 34, line 21 (Step 3): "We deleted irrelevant genes from the tree" - This is a very  
998 reckless formulation. Who decides what is irrelevant? Instead, describe and defend your criteria  
999 clearly and methodically.

1000 Revised as follows: "In order to reduce the computation time, we retained genes from ..., and  
1001 deleted the remaining genes from the tree. Then, we inserted the lamprey genes ..."

1002 **###S130:** Page 34, line 26 (last line): Replace "branching pattern" with "tree topology".  
1003 Revised as suggested.

1004 **###S131:** Page 35, line 4: Replace "should be clustered" with "would cluster".  
1005 Revised as suggested.

1006 **###S132:** Page 35, line 6: Use the plural "annotations".  
1007 Revised as suggested.

1008 **###S133:** Page 35, line 20: Replace "the one third of high-GC genes" with "the third of the genes  
1009 with the highest GC content".  
1010 Revised as suggested.

1011 **###S134:** Page 35, line 25: Make sure that you have described earlier which sea lamprey assembly  
1012 you have used for these analyses. Is it the latest germline genome assembly version, or the much  
1013 poorer previous assembly? In any case, it doesn't hurt to remind the reader here as well.  
1014 We used the germline sea lamprey genome as written in the main text.

1015 **###S135:** Page 35, lines 25-16: I suggest "The annotation of **sea lamprey paralogs was done by**  
1016 using RAXML-EPA with **the** WAG matrix (method A), **and** is shown in Figure S13."  
1017 Revised as suggested.

1018 **###S136:** Page 35, lines 30-31: The authors refer to the supplementary figures (Fig. S9-S13, and  
1019 Fig. S14 on the next page) when they write about Hox genes, yet the Hox genes are not marked  
1020 out in these figures. How will the reader verify that this is correct?  
1021 It was explained in the figure legend.

1022 **###S137:** Page 35, line 28 - page 36, line 4: It would be helpful if the authors could discuss the  
1023 most likely alternative scenario that could explain the same results. Why isn't a shared 1R/2R at  
1024 the base of vertebrates followed by independent fissions/segmentations a likely scenario?  
1025 Something like this, shared 1R followed by independent chromosome-level segment duplications  
1026 and fissions, has been proposed by Jeremiah Smith and co-authors, for instance, based on the  
1027 synteny conservation of the latest sea lamprey germline genome. Based on the current results  
1028 presented in this papers, why are these alternative scenarios less likely? This is something that I  
1029 miss in this paper in general.

1030 This comment is the same as Reviewer 1's [Comment 06], so please see our response to  
1031 [Comment 06].

1032 **###S138:** Page 36, lines 20-21: The sentence starting "It was previously shown..." is difficult to  
1033 follow. It's not clear what the "branching patterns" of the human genome refers to. It might just  
1034 be that a lot of information is packed very densely into this sentence. Please clarify.  
1035 The sentence was revised as follows: "It was previously shown that clustered human ohnologs do  
1036 not always have the same branching pattern (or duplication timing)."

1037 **###S139:** Page 37, lines 2-3: I suggest "Figure S14 **suggests** that a majority of ohnologs..." It's not  
1038 entirely clear how this figure shows sequence divergence. Only panel a in the figure seems to  
1039 show this, is that right? Please clarify.  
1040 This is a misunderstanding. The triangular plots show the presence of many Vertebrata ohnologs.

1041 **###S140:** Page 37, line 4: The authors write "two out of four" but I can't really see this in the cited  
1042 figures. Some guidance would be good. In addition, the figure caption for Fig. S14 mentions "two  
1043 out of six" ...  
1044 Figure 6 shows chromosome fusions between 1R and 2R, resulting in two fusion chromosomes out  
1045 of four chromosomes that were duplicated from a proto-vertebrate chromosome. If we focus on a  
1046 chromosome fusion event involving two proto-vertebrate chromosomes, we get two fusion  
1047 chromosomes and four non-fusion chromosomes in the proto-gnathostome genome.

1048 **###S141:** Page 44, Figure S3: The y-axis designation "Proto-vertebrate/-cyclostome" is seemingly  
1049 contradictory. I understand that these are the Japanese lamprey scaffolds, but it is confusing to  
1050 lead with a seemingly contradictory statement. They can't be proto-vertebrate and proto-  
1051 cyclostome chromosomes at the same time. I suggest changing the formulation "proto-  
1052 vertebrate/proto-cyclostome chromosomes represented by Japanese lamprey scaffolds..." to  
1053 simply "The Japanese lamprey scaffolds were compared with invertebrate genomes (x-axes). In  
1054 this way we could validate both the proto-vertebrate and proto-cyclostome chromosome  
1055 reconstructions. Horizontal orange lines represent the boundaries of Japanese lamprey scaffolds  
1056 and black horizontal lines represent the boundaries of the corresponding proto-vertebrate  
1057 chromosomes." This should be applied to all the similar figures - Fig 1, Figs. S2, S3, S4, S6, S7 - and  
1058 within the figure captions and manuscript text. Name the y- and x- axes for what they actually  
1059 show, not what they "represent".  
1060 We revised the figure legend as follows: "Japanese lamprey segments that were mapped to the  
1061 proto-vertebrate/-cyclostome chromosomes are shown on the y-axis. Black and orange horizontal  
1062 lines indicate boundaries of proto-vertebrate chromosomes and proto-cyclostome chromosomes,  
1063 respectively." We also changed the y-axis label from "Proto-vertebrate/-cyclostome" to "Proto-  
1064 vertebrate chromosomes" and enumerated from Pvc1 to Pvc18. The reconstruction method is  
1065 described in detail in Supplementary Information, so there should be no confusions between  
1066 Japanese lamprey segments and proto-vertebrate chromosomes.

1067 In addition, I cannot see any horizontal grey lines in the figure - they are mentioned in line 5 of the  
1068 figure caption. I also can't see the difference between thick and thin vertical lines - mentioned in

1069 lines 7-8 of the caption.  
1070 The horizontal gray lines and vertical thin gray lines were removed just before the initial  
1071 submission, but we forgot to edit the figure legend. Those texts were deleted in the revised  
1072 manuscript.

1073 **###S142:** Page 44, line 11 (last line of figure caption): See my comment above regarding page 24,  
1074 lines 18-19. This shows that the synteny patterns can be recreated to **some extent** in invertebrate  
1075 genomes, but it doesn't definitively show that they represent ancestral metazoan chromosomes.  
1076 Be careful with this conjecture.  
1077 See our comment to Comment S106.

1078 **###S143:** Page 46-47: This figure caption is inordinately long. Please include only information  
1079 necessary for the **graphical** interpretation the figure. Everything else should go in the  
1080 supplementary information text, if it's not there already. The description of this procedure is very  
1081 good, it should be part of the main text, not a caption!  
1082 In the revised manuscript, the figure was moved to the main text with a concise description.

1083 **###S144:** Page 48, Fig. S6: It would be very helpful to enumerate Pvc1-17 and PvcUn on the X-axis  
1084 of the figure, and the proto-gnathostome chromosomes on the y-axis.  
1085 We enumerated Pvc1-18 on the x-axis. The proto-gnathostome chromosomes are not numbered  
1086 in our analysis.

1087 The caption of this figure illustrates my comment about alternative scenarios. The authors very  
1088 clearly describe their scenario, and highlight the data which illustrate their point very well. But can  
1089 they disprove/falsify alternative scenarios? Can this same data illustrate any of the alternative  
1090 scenarios? What would the data look like if the most likely alternative scenario were true? Could  
1091 the rearrangements not be post-2R or pre-1R fusions? This analysis doesn't differentiate between  
1092 1R-generated and 2R-generated paralogs. Help the reader navigate these alternatives.  
1093 It is also possible that all chromosome fusion events occurred after 2R, but in that case, we need  
1094 to assume that the chromosome fusions occurred non-randomly. Specifically, the proto-  
1095 gnathostome chromosomes duplicated from Pvc2 must have been preferentially fused with the  
1096 proto-gnathostome chromosomes duplicated from Pvc3. We favor a more parsimonious scenario  
1097 in which such chromosome fusions occurred between 1R and 2R.

1098 **###S145:** Page 48, Fig. S6: There are some curiosities in this figure that are not mentioned.  
1099 Notably, the orthology between Pvc17 and proto-gnathostome chromosome 9. Wouldn't this  
1100 result from a large-scale fission? When did this occur? The authors have not mentioned fissions in  
1101 the paper.  
1102 We illustrated it in Figure 6e as a post-2R translocation (or chromosome fission followed by a  
1103 fusion). It is inferred to have occurred after 2R because only one out of four duplicated proto-  
1104 gnathostome chromosomes was affected by this rearrangement.

1105 **###S146:** Page 48, line 3: Correct "axe" to "axis".  
1106 Revised as suggested.

1107 **###S147:** Page 49, Fig. S7: The horizontal grey lines are barely visible, even when I zoom in on the  
1108 PDF.  
1109 This must have happened during the manuscript processing on the journal website. We inserted  
1110 vector image figures in our submission and we expect the final images to be high resolution.

1111 **###S148:** Page 49, line 1: “Comparison with the lampreys and amphioxus genomes.” Comparison  
1112 of what? Instead of writing “proto-gnathostome” at the y-axis, describe what it actually shows.  
1113 Correct “lampreys” to “lamprey”.  
1114 The figure title is revised as “Comparison of the proto-gnathostome genome with the lamprey and  
1115 amphioxus genomes.” The y-axis shows the proto-gnathostome chromosomes represented by the  
1116 human segments.

1117 **###S149:** Page 49, line 7: I can’t tell the difference between thick and thin vertical lines in the  
1118 figure.  
1119 Again this is possibly caused by journal website processing for review and we suspect that our  
1120 vector image figures were converted to raster images.

1121 **###S150:** Page 49, lines 8-9: Explain that the 1:4-orthology between proto-vertebrate and proto-  
1122 gnathostome genomes is shown in the amphioxus panel of the figure, if I’ve understood this  
1123 correctly.  
1124 We inserted “(shown in the amphioxus panel)”.

1125 Perhaps it would also be better to order the panels of the figure in the inverse order.  
1126 We thank Reviewer 1 for this suggestion, and we revised the figure as suggested. The figure legend  
1127 was also edited accordingly.

1128 In general, it is quite difficult to relate the caption to the figure. Doesn't the two lamprey panels  
1129 show that both 1R and 2R occurred **after** the divergence of cyclostomes? It shows the same  
1130 relationships as the amphioxus panel. Very tricky to know what to look at.  
1131 This figure is not enough for discussing the divergence timing. We need to investigate the  
1132 distribution of paralogs (Vertebrata paralogs, gnathostome-specific paralogs and cyclostome-  
1133 specific paralogs) as shown in Figs. S9-S14.

1134 **###S151:** Page 49, line 12: None of this numbering is shown in the figure, so it’s very difficult to  
1135 know what to look at.  
1136 We added x-axis labels (i.e. Pvc1-18 on the x-axis) in the revised figure.

1137 **###S152:** Fig. S9 - Fig. S13: Please describe what the x- and y-axes of these figure represent.  
1138 See Figure 4 for the meaning of the x- and y-axes.

1139 **###S153:** Page 56, Fig. S14: I almost gave up trying to interpret this figure. It is incredibly  
1140 information-dense and there are seemingly some missing parts? Why are there no triangular plots  
1141 for the upper scatterplots? Please write out next to the rectangular scatterplots what they actually  
1142 show. For example, I’ve mocked up an image for panel a...

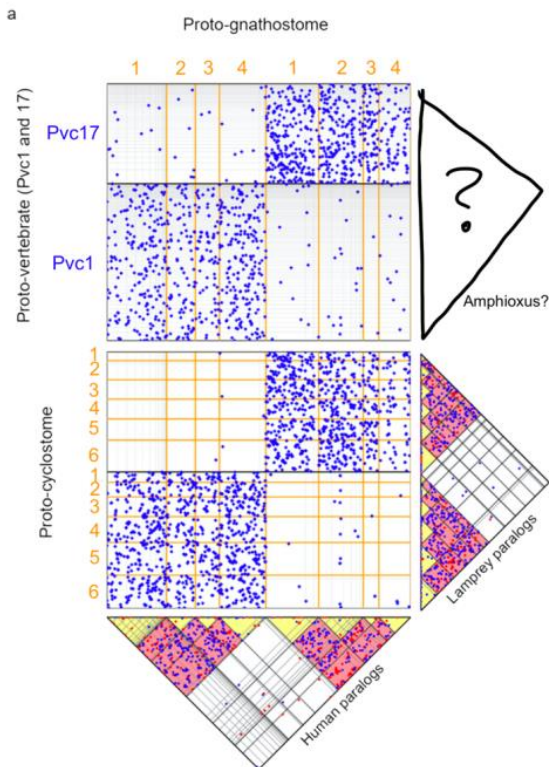

1143  
1144  
1145

There are no missing parts. There is no WGD in the amphioxus genome or the proto-vertebrate genome, and thus we do not discuss their paralog distributions.

1146  
1147  
1148  
1149  
1150  
1151  
1152  
1153

Replace the numbering in orange for the actual chromosome numbers. This was useful for me to see the 1:4 and 1:6 relationships between the proto-vertebrate and the proto-gnathostome and proto-cyclostome, respectively. For the bottom scatterplot, it would also be clearer to use black lines, not orange to mark the boundaries of the proto-cyclostome chromosomes. Because the top and bottom scatterplots are so similar, I was expecting that Pvc1 and Pvc17 were also plotted in the bottom scatterplot. This would avoid the confusing “bottom and left”, “bottom and right”, “bottom six”, “middle two out of six”... give them numbers! I still don’t know what “middle two out of six” refers to.

1154  
1155  
1156  
1157

Reviewer 1 was confused because he looked at a wrong panel. We revised the text from “(b,c)” to “In panels b and c,” to emphasize the panels, because we found this is the main source of the confusion. We also changed “bottom and left” to “bottom” and “top and right” to “top”. We used orange lines because we previously got a comment that black lines looked confusing in this figure.

1158  
1159  
1160  
1161  
1162  
1163

**###S154:** Page 56, line 13-14: Perhaps it would be better to note what the figure **does** show, rather than what it **doesn’t** show? I.e. the 1:4 relationship between the proto-vertebrate and proto-gnathostome reconstructions, and the 1:6 relationship between the proto-vertebrate and the proto-cyclostome reconstructions. To be fair, only panel a shows this undoubtedly, but you can argue for panel b and c, which I suspect are the more common occurrences. Also, it would be helpful to know what it would look like if indeed there was 1:1 orthology relationship - i.e. what if

1164 [the alternative hypothesis is true? Can the data be described with alternative scenarios?](#)  
1165 It seems Reviewer 1 misunderstood the meaning of the figure. The figure shows that (1) there is  
1166 no clear one-to-one or two-to-three relationship between the four proto-gnathostome  
1167 chromosomes and the proto-cyclostome chromosomes; and (2) fusions are not shared with the  
1168 proto-cyclostome lineage. Panel a shows the case of no fusions in the proto-gnathostome lineage,  
1169 while Panes b and c shows fusions between 1R and 2R. If there was one-to-one orthology  
1170 relationship, we should see a non-uniform distribution of ortholog dots. In the revised manuscript  
1171 we deleted the discussion of alternative scenarios, since Reviewer 1 commented that the  
1172 description is unclear (see Reviewer 1's [Comment S62]). We can also delete this figure if it is so  
1173 difficult.  
1174

## Reviewers' Comments:

### Reviewer #2:

#### Remarks to the Author:

The manuscript "Reconstruction of proto-vertebrate, proto-cyclostome and proto-gnathostome genomes provides new insights into early vertebrate evolution" reports what appear to be two high quality assemblies and uses these assemblies to gain further insights into the history of vertebrate evolution. My previous review of this paper was performed without access to the code that was used to generate analyses or important details on the assembly and analysis pipelines. The author's efforts to share code and edit the manuscript to clarify the methods has made it much easier to review. I do have several comments that I think need to be thoroughly addressed and outline these below.

1) Access to code used in synteny analyses – The authors should make the code publicly available and equally importantly provide user documentation that has become standard practice in code repositories. Given that they mention in their example scripts that components of the code (e.g. variables) are different from the previously published, (but still not public) version it would be nice to see that code released as well along with usage information for the older version and details of what has changed between versions. I spent two afternoons going through the code (other comments below) and I did not note any components of the code that should impinge on copyright. It is my impression that release of well documented code is essential to this paper and essential to ensure reproducibility.

2) Access to code used in genome assembly - The use of HiRise (Dovetail) in the lamprey and shark assembly pipelines raises some issues with reproducibility as that program is maintained as closed source code by Dovetail. As such it will be impossible for anyone to independently replicate the published assembly using the same methods reported in the paper. This may change in the future if the code is released, and I encourage the authors to request its release. If this request is not granted, the authors should make sure to include the software version used for this assembly and all relevant assembly/filtration parameters, as well as .agp (or similar) files that relays mapping evidence and weights that were used in the scaffolding process. Dovetail can provide this.

3) The analyses seem to have been run in three parts that define a specific hypothetical duplication scenario. Why was the reconstruction not performed using all of the data in a single run? What happens if they do this? Is the reconstruction the same or different?

4) The authors state "To distinguish between alternative polyploidization models (i.e. S5–S8 in Fig. 1) we introduced a measure we have called multiplicity" this is clearly not a new idea and they should consider rewording (e.g. Putnam, N.H. et al. 2007). In addition, assessment of multiplicity cannot (as implemented) define the mode of duplication that gave rise to the patterns without explicit statistical tests. I laid out how to perform these tests in the previous review, but these were not performed. From examining the code it appears that they used clustering method seeded with 18 clusters to assign lamprey chromosomes to their ancestral chromosomes. It is therefore even less surprising now that they would observe a peak at 6. Please provide explicit tests of multiple duplication scenarios as laid out in the previous review.

5) I again request that they change "proto-cyclostome" to "proto-petromyzontid". The observation of six *hox* clusters in hagfish may be consistent with their observations, but hardly raises to the level where one might imagine that hexaploidy should be assumed for the entire hagfish genome with certainty.

6) Part of the justification that their "cyclostome" reconstruction is plausible is that there have been other described instances of hexaploidy in vertebrates, despite the obvious issues this raises for obligately sexually reproducing species. However, this assertion seems to be a misinterpretation of those bodies of literature. Shortnose sturgeon have been called "functionally hexaploid" due to



pervasive loss of duplicates (microsatellites) following WGDs, but they are clearly of octaploid origin (Symonová R et al BMC Genet. 2017). Prussian carp hexaploids reproduce only by gynogenesis and are sexual parasites on diploid and tetraploid populations. Justifying their model from a biological standpoint will require substantial alteration of the current discussion and should address whether they are invoking gynogenesis in the origin of cyclostomes/petromyzontids and how this might have transitioned back to a stably meiotic lineage.

7) The authors state "Although several recent studies supported the ancient origin of microchromosomes, it was still unknown (1) if chromosomal features characteristic to modern avian microchromosomes (i.e. high GC content, high gene density and high recombination rate) were already present in the ancestral gnathostome genome" although this seems to not to acknowledge analyses of the spotted gar genome that resolved many of these feature for the ancestral euteolostome, which is only ~40 million years divergent from the ancestral gnathostome they are reconstructing (Braasch, et al. Nat Genet, 2016). Additionally, the spotted gar genome paper is not cited at all despite use of the assembly for their reconstructions.

8) The authors state "In order to verify the timing of the gnathostome-cyclostome divergence with respect to 1R and 2R, we performed an analysis based off Ensembl gene trees on the reconstructed chromosomes ..." These analyses should be re-done from scratch as ENSEMBL trees are forced to a pre-defined topology (with lamprey splits specifically designated as basal gnathostome splits) and are therefore cannot be directly used to perform the tests. This is laid out in (Smith et al. Nat Genet, 2013), but has been notably been erroneously used by others to test similar ideas to those presented in this manuscript.

9) The authors should present, in the main manuscript, more detail regarding the numbers and distribution of ohnologs (and other duplicates) across presumptive paralogous segments (particularly those in Figure 6d/e/g). This is essential to evaluating evidence favoring duplication vs fission in the origin of these segments, which is in turn essential for evaluating evidence as it relates to proposed duplication scenarios (both gnathostome and cyclostome). The authors should be able to gain some inspiration as to how to do this by looking at another paper that is generally similar to this one (Simakov, et al. Nat Ecol Evol 2020: Fig 3, 4b) and even improve upon that presentation. I requested something similar in the previous review (and prior to seeing the Simakov paper) but this request was not satisfactorily addressed, and the revision makes the need for this even clearer.

10) Given that the Simkakov paper was released after the initial submission of this manuscript it may be unfair to require that the authors consider the specific models proposed by that paper, but I am certain readers will welcome it and perhaps expect it. Details of these reconstructions differ in profound ways.

11) Related to the above comments, please also provide numbers of orthologs that support each of the conserved segments in Figure 6E and 6G (after addressing other points). Presentation in the main manuscript will provide essential detail to the reader.

11) Related to point 9, and with apologies for the length of this comment, it appears that the program used for these analyses makes a statistical faux pas in assessing evidence that that two ancestrally linked segments are derived from fission vs. duplication. If I am interpreting the code correctly, the authors use a statistically appropriate test to identify segments that have an excess of shared homologs or ohnologs relative to random. Many of the other studies mentioned in the manuscript and above others have used similar approaches to although the use of the hypergeometric distribution for these tests is laudable. However, it appears that the ohnolog statistic is compared to the ortholog statistic as part of the assessment of whether a segment is likely to be derived from duplication vs fission which does not really shed light on the question at hand if this is true, and appears to not be an appropriate use of these values. Though admittedly the code here is a bit hard to follow given the layout and the supplement seems not to clearly address this. Issues with p-value/ test probability

comparison may not be immediately obvious to the casual observer, but were pointed out by Fisher and subsequently by many others due to pervasive misuse (a couple of modern examples: <https://www.ncbi.nlm.nih.gov/pmc/articles/PMC5804470/> , <https://www.tandfonline.com/doi/abs/10.1080/00031305.1996.10474380>).

A more appropriate approach might be to compare the observed frequency of duplicates on presumptive paralogous segments to the distribution of similarly-aged duplicates within conserved segments. It is necessary to infer that some duplications will be present between fissioned segments because, 1) intrachromosomal duplication is known to occur frequently, even within the human population, and 2) intrachromosomal rearrangements have effectively randomized gene orders over the timescales that are analyzed here; one would expect that two pieces of a fissioned chromosome will carry paralogs that are derived from ancient intrachromosomal duplications (i.e. not WGDs). Therefore, one should be able specifically test whether the presumptive WGD paralogous segments carry more duplicates than would be expected for the average fission event. A test like this is seemingly critical given the definitive statements that are made throughout the manuscript. Perhaps also clearly state in the methods how duplication are differentiated from fissions, especially if I have made some error in interpretation here.

12) The supplemental movie seems to show progress in defining clusters in the cyclostome-centric analysis?? But does not really seem to shed much light into the inner workings of the programs they use.

Given these large issues I will withhold comment on other specific details (e.g. discussions of immunology, discussion of ancient hybridization – or alternately incomplete lineage sorting - in the supplement) for the moment since many details could change depending on how these above comments are addressed. I am certain that all of these requests can be addressed with statistical rigor and in a way that facilitates reproducibility. I hope that the comments above make that easier.

Sincerely,

Jeremiah Smith

Reviewer #3:

Remarks to the Author:

I wanted to congratulate the authors for their efforts addressing the extensive comments from all the reviewers. I sincerely think that a manuscript that was already great has improved a lot.

1 We thank the two reviewers for their time and valuable constructive comments about our  
2 manuscript. We provide a point-by-point response to the reviewers' comments below and describe  
3 the additional work and changes made to the manuscript. We have labeled Reviewer 2's comments  
4 as [R2 Comment 01], which stands for review round two, comment number one, to distinguish from  
5 the comments in the previous round of peer-review. Previous review comments are mentioned as  
6 Comment 14, etc. References are listed at the end of the file.

## 7 8 **Reviewer #2 (Comments to the Authors)**

9 The manuscript "Reconstruction of proto-vertebrate, proto-cyclostome and proto-gnathostome  
10 genomes provides new insights into early vertebrate evolution" reports what appear to be two high  
11 quality assemblies and uses these assemblies to gain further insights into the history of vertebrate  
12 evolution. My previous review of this paper was performed without access to the code that was used  
13 to generate analyses or important details on the assembly and analysis pipelines. The author's efforts  
14 to share code and edit the manuscript to clarify the methods has made it much easier to review. I do  
15 have several comments that I think need to be thoroughly addressed and outline these below.

16  
17 **[R2 Comment 01]** 1) Access to code used in synteny analyses – The authors should make the code  
18 publicly available and equally importantly provide user documentation that has become standard  
19 practice in code repositories. Given that they mention in their example scripts that components of the  
20 code (e.g. variables) are different from the previously published, (but still not public) version it  
21 would be nice to see that code released as well along with usage information for the older version  
22 and details of what has changed between versions.

23 There are no older versions and the code is the same as the one used in our previous publication  
24 [Nakatani and McLysaght, *Bioinformatics* (2017)]. The comment in our user documentation  
25 (README.txt) actually means that the symbols used in the program are different from the symbols  
26 written in the previously published paper [Nakatani and McLysaght, *Bioinformatics* (2017)].

27  
28 I spent two afternoons going through the code (other comments below) and I did not note any  
29 components of the code that should impinge on copyright. It is my impression that release of well  
30 documented code is essential to this paper and essential to ensure reproducibility.

31 We have edited the code document extensively in order to make it publicly accessible; however  
32 copyright issues have not been cleared completely (see  
33 <http://numerical.recipes/licenses/redistribute.html>). To ensure reproducibility, we have indicated that  
34 the programs are available upon request to the authors.

35  
36 **[R2 Comment 02]** 2) Access to code used in genome assembly - The use of HiRise (Dovetail) in the

37 lamprey and shark assembly pipelines raises some issues with reproducibility as that program is  
38 maintained as closed source code by Dovetail. As such it will be impossible for anyone to  
39 independently replicate the published assembly using the same methods reported in the paper. This  
40 may change in the future if the code is released, and I encourage the authors to request its release. If  
41 this request is not granted, the authors should make sure to include the software version used for this  
42 assembly and all relevant assembly/filtration parameters, as well as .agp (or similar) files that relays  
43 mapping evidence and weights that were used in the scaffolding process. Dovetail can provide this.

44

45 As suggested by the reviewer we contacted Dovetail and obtained the software version used for the  
46 HiRise assemblies: version v2.1.3-5ce4af34ac25 for the elephant shark genome assembly and  
47 version v2.1.2-ad17ecf8bf57 for the Japanese lamprey genome assembly. This is now mentioned in  
48 the manuscript (Supplementary Information line 97 and 250, respectively). Dovetail has also informed  
49 us “Unfortunately, were not able to release the HiRise code and do not anticipate this changing in the  
50 future. Our pipeline does not have variable parameters and only uses MQ>50 for scaffolding.” We  
51 note that more than 75 genome papers that have used Dovetail services have been published in  
52 reputable journals including *Nature* and *Nature Genetics* and none of them have provided the HiRise  
53 code.

54

55 **[R2 Comment 03]** 3) The analyses seem to have been run in three parts that define a specific  
56 hypothetical duplication scenario. Why was the reconstruction not performed using all of the data in  
57 a single run?

58 One of the major aims of our study is to investigate if the proto-gnathostome and the proto-  
59 cyclostome lineages share the same duplication events (including 1R). The best way to achieve this  
60 is to compare the genome structure between independently reconstructed genomes of the proto-  
61 cyclostome and proto-gnathostome lineages. Otherwise it would be difficult to distinguish shared  
62 rearrangements from inference artefacts.

63

64 **What happens if they do this? Is the reconstruction the same or different?**

65 To our knowledge, single-run approaches for multiple WGDs in different lineages have never been  
66 proposed before. We think that it requires development of suitable evolutionary models and  
67 inference algorithms that account for the lack of clear orthology relationship between proto-  
68 cyclostome chromosomes and proto-gnathostome chromosomes.

69

70 **[R2 Comment 04]** 4) The authors state “To distinguish between alternative polyploidization models  
71 (i.e. S5–S8 in Fig. 1) we introduced a measure we have called multiplicity” this is clearly not a new  
72 idea and they should consider rewording (e.g. Putnam, N.H. et al. 2007).

73 We have revised the text as follows: "To distinguish between alternative polyploidization models  
74 (i.e. S5–S8 in Fig. 1) we followed ref. [Nakatani et al. *Genome Res* (2007)] and used a measure we  
75 have called multiplicity..."

76

77 The idea was initially proposed by us in Nakatani et al., *Genome Res* (2007), which was an extension  
78 of the idea proposed in [Dehal and Boore, *PLoS Biol* (2005)]. In Nakatani et al. (2007), candidate  
79 reconstructions into two, three, four, or five post-2R chromosomes were compared and the optimal  
80 reconstruction to define the proto-gnathostome chromosomes was chosen. A similar optimality  
81 analysis was performed in [Muffato, PhD Thesis (2012)], but not in [Putnam et al. *Science* (2007);  
82 Putnam et al. *Nature* (2008)].

83

84 [In addition, assessment of multiplicity cannot \(as implemented\) define the mode of duplication that  
85 gave rise to the patterns without explicit statistical tests. I laid out how to perform these tests in the  
86 previous review, but these were not performed.](#)

87 In the revised manuscript submitted previously, we had added a detailed discussion that the clear  
88 peak at multiplicity six suggests six-fold duplication of the entire genome between the proto-  
89 vertebrate and proto-cyclostome lineages (please also see our response to Comment 12 in the  
90 previous review). This time, we have developed (see below) a framework for calculating the  
91 probability that the multiplicities of the proto-vertebrate chromosomes converge toward six through  
92 a series of independent chromosome-scale duplication events.

93

94 [From examining the code it appears that they used clustering method seeded with 18 clusters to  
95 assign lamprey chromosomes to their ancestral chromosomes. It is therefore even less surprising  
96 now that they would observe a peak at 6.](#)

97 As described in the Supplementary Information, we tried reconstructions with  $K = 10, \dots, 20$  and  
98 then the optimal value ( $K=18$ ) was chosen (see Supplementary Information Section 3.2.3 and  
99 Supplementary Table S8). In fact the choice of the value of  $K$  has limited influence on the  
100 multiplicity peak at six. This is because changing the value of  $K$  mainly affects smaller proto-  
101 vertebrate chromosomes, and it doesn't affect our observation that each of the largest five proto-  
102 vertebrate chromosomes were duplicated into six proto-cyclostome chromosomes.

103

104 [Please provide explicit tests of multiple duplication scenarios as laid out in the previous review.](#)

105 To test chromosome-scale duplication scenarios, we have now introduced a framework for  
106 calculating the probability that multiplicities of independently duplicating chromosomes converge  
107 toward a given ploidy level, where the convergence is measured in terms of the deviation ( $\delta$ ) from  
108 the given ploidy level. Application to the proto-cyclostome genome shows that the observed peak of

109 multiplicity at six is unlikely to be created by chance through accumulation of chromosome-scale  
110 duplications.

111

112 Let us consider the following situation. The proto-vertebrate genome with  $K$  chromosomes  
113 underwent one or two polyploidization events, producing  $X_k$  ( $k = 1, \dots, K$ ) duplicates for each  
114 proto-vertebrate chromosome ( $X_k = 2$  for all  $k$  after 1R or  $X_k = 4$  after two rounds of  
115 tetraploidization). Subsequently, those  $X = \sum_{k=1}^K X_k$  chromosomes were duplicated by a series of  
116 independent chromosome-scale duplications, eventually creating  $Y_k$  duplicates for each proto-  
117 vertebrate chromosome ( $k = 1, \dots, K$ ). As a measure of deviation from a polyploidization-only  
118 model, we define  $\delta(Y_k) = \sum_{k=1}^K |Y_k - M|$ , where  $M$  is the expected multiplicity ( $M = 6$  in our  
119 model). Assuming that all chromosomes are equally likely to be duplicated, we calculate  
120  $P(\delta(Y_k) \leq D | \sum_{k=1}^K Y_k = Y)$ , the probability that the deviation is smaller than or equal to the  
121 observed deviation  $D$  (i.e.  $D = 13$  in our reconstruction) conditioned by the total number of proto-  
122 cyclostome chromosomes  $Y$  (i.e.  $Y = 103$  in our reconstruction).

123

124 The desired probability is calculated as follows. First, the total number of duplication scenarios is  
125 given by  $T = \Gamma(Y)/\Gamma(X)$ , where  $\Gamma(n) = (n-1)(n-2) \cdots 1$  is the gamma function. Second, for  
126 given  $Y_k$  ( $k = 1, \dots, K$ ), the number of duplication scenarios in which individual proto-vertebrate  
127 chromosomes are eventually duplicated into  $Y_k$  proto-cyclostome chromosomes is given by  
128  $S(Y_1, \dots, Y_K) = (Y_1, \dots, Y_K)! \prod_{k=1}^K \Gamma(Y_k)/\Gamma(X_k)$ , where  $(Y_1, \dots, Y_K)!$  is the multinomial coefficient.  
129 Then, by enumerating all  $Y_k$  values, we can calculate the desired probability (i.e. independently  
130 duplicating proto-vertebrate chromosomes converging to multiplicity  $M$  by chance alone) as  
131  $P(\delta(Y_k) \leq D | \sum_{k=1}^K Y_k = Y) = \sum_{\{Y_k\}} S(Y_1, \dots, Y_K)/T$ , where the summation is taken over all  $Y_k$  that  
132 satisfy  $\delta(Y_k) \leq D$  and  $\sum_{k=1}^K Y_k = Y$ .

133

134 In our reconstruction, we have  $K = 17$ ,  $Y = 103$ ,  $D = 13$  and  $M = 6$  (see Table below). We  
135 evaluate the following five evolutionary scenarios: (A) chromosome-scale duplications with no  
136 tetraploidization, (B) one tetraploidization followed by chromosome-scale duplications, (C) two  
137 tetraploidizations followed by chromosome-scale duplications, (D) chromosome-scale duplications  
138 followed by one tetraploidization, and (E) first tetraploidization followed by chromosome-scale  
139 duplications followed by second tetraploidization. In these scenarios we assume that  $X_k = N$  for all  
140  $k$ , where we set  $N = 1$  and  $M = 6$  for Scenario A;  $N = 2$  and  $M = 6$  for Scenario B;  $N = 4$   
141 and  $M = 6$  for Scenario C;  $N = 1$  and  $M = 3$  for Scenario D; and  $N = 2$  and  $M = 3$  for  
142 Scenario E. We set  $(Y_1, \dots, Y_{17}) = (6, 5, 6, 6, 7, 7, 6, 6, 4, 6, 8, 5, 6, 4, 9, 6, 6)$  for Scenarios A/B/C and  
143  $(Y_1, \dots, Y_{17}) = (3, 2, 3, 3, 3, 3, 3, 2, 3, 4, 2, 3, 2, 4, 3, 3)$  for Scenarios D/E, based on the proto-cyclostome  
144 genome reconstruction. In addition, we evaluate the case of  $K = 5$ ,  $Y = 30$  and  $D =$

145 0 (see Table below), because larger proto-vertebrate chromosomes are more reliable in our  
 146 reconstruction and the largest five proto-vertebrate chromosomes have multiplicity six, as we have  
 147 discussed in the main text.

| Scenario | <i>K</i> | <i>Y</i> | <i>D</i> | <i>N</i> | <i>M</i> | <i>P</i>     |
|----------|----------|----------|----------|----------|----------|--------------|
| A        | 17       | 103      | 13       | 1        | 6        | 0.0000000018 |
| B        | 17       | 103      | 13       | 2        | 6        | 0.0000030304 |
| C        | 17       | 103      | 13       | 4        | 6        | 0.0214209597 |
| D        | 17       | 49       | 6        | 1        | 3        | 0.0000002044 |
| E        | 17       | 49       | 6        | 2        | 3        | 0.0038115884 |
| A        | 5        | 30       | 0        | 1        | 6        | 0.0000421035 |
| B        | 5        | 30       | 0        | 2        | 6        | 0.0003120318 |
| C        | 5        | 30       | 0        | 4        | 6        | 0.0049925087 |
| D        | 5        | 15       | 0        | 1        | 3        | 0.0009990010 |
| E        | 5        | 15       | 0        | 2        | 3        | 0.0159840160 |

148  
 149 The table shows small probabilities of observing convergence of multiplicities through independent  
 150 chromosome-scale duplications. Thus, it is unlikely that the proto-cyclostome genome was shaped  
 151 by a series of independently occurring chromosome-scale duplications.

152  
 153 Based on this analysis, we have revised the main text as follows.  
 154 "In addition, we confirmed that the observed peak of multiplicity (Fig. 3d) is unlikely to have been  
 155 created by accumulation of chromosome-scale or segmental duplications after a tetraploidization  
 156 event (Scenario S8 in Fig. 1) by statistical test ( $P=0.0000030304$ , see Supplementary Information  
 157 Section 3.5 for details). Thus, the clear peak at multiplicity of six is compelling evidence of six-fold  
 158 duplication of the entire genome, probably through a tetraploidization and a hexaploidization event."

159  
 160 **[R2 Comment 05]** 5) I again request that they change “proto-cyclostome” to “proto-petromyzontid”.  
 161 The observation of six hox clusters in hagfish may be consistent with their observations, but hardly  
 162 raises to the level where one might imagine that hexaploidy should be assumed for the entire hagfish  
 163 genome with certainty.

164 The sea lamprey genome paper [Smith et al., *Nat Genet* (2018)] and our analysis found the absence  
 165 of clear distinction between ancient duplication and more recent duplication events among lamprey  
 166 chromosomes, suggesting that the more recent duplication (that we call cyclostome-specific  
 167 hexaploidization) occurred shortly after 1R. In addition, our analysis showed strong gene order  
 168 conservation between Japanese lamprey scaffolds and sea lamprey scaffolds, whereas little gene  
 169 order conservation was observed between paralogous scaffolds generated by the hexaploidization  
 170 event. These observations suggest that the hexaploidization event occurred in an ancestral lineage  
 171 considerably more ancient than the proto-petromyzontid.

172

173 Nevertheless, the exact phylogenetic position of the hexaploidization event should eventually be  
174 determined by analyzing the chromosome-level hagfish genome assembly, and it would be an  
175 exciting discovery if the lamprey and hagfish genomes underwent independent hexaploidization  
176 events as suggested by Reviewer 2. At present, however, we do not have supporting evidence for  
177 two independent hexaploidization events in the two lineages as opposed to a single hexaploidization  
178 event shared by the two lineages. For this reason, we would prefer to retain the original description  
179 and call the reconstruction “proto-cyclostome”, following the study of Hox clusters in hagfish which  
180 suggested that the hagfish and lamprey lineages share the same cyclostome-specific duplication  
181 event [Pascual-Anaya et al., *Nat Ecol Evol* (2018)].

182

183

184 **[R2 Comment 06]** 6) Part of the justification that their “cyclostome” reconstruction is plausible is  
185 that there have been other described instances of hexaploidy in vertebrates, despite the obvious  
186 issues this raises for obligately sexually reproducing species.

187 We would like to make it clear that we didn’t present the cases of hexaploidization in vertebrates as  
188 a justification of our reconstruction. We mentioned those cases of hexaploidization to inform readers  
189 that hexaploidization is not impossible in vertebrates.

190

191 However, this assertion seems to be a misinterpretation of those bodies of literature. Shortnose  
192 sturgeon have been called “functionally hexaploid” due to pervasive loss of duplicates  
193 (microsatellites) following WGDs, but they are clearly of octaploid origin (Symonová R et al *BMC*  
194 *Genet.* 2017).

195 This seems to be a misunderstanding by Reviewer 2. It has been considered that the shortnose  
196 sturgeon with ~360 diploid chromosomes is a functional hexaploid of dodecaploid origin [see  
197 Fontana et al., *Genome* (2008); Trifonov et al., *Chromosoma* (2016)], and the diploid chromosome  
198 number was inferred to have increased as 60-120-240-360 from the ancestral sturgeon to the  
199 shortnose sturgeon (see Fig. 5 in [Symonová et al. *BMC Genet* (2017)], Fig. 3 in [Trifonov et al.,  
200 *Chromosoma* (2016)], and Fig. 3 in [Fontana et al., *Genome* (2008)]).

201

202 Prussian carp hexaploids reproduce only by gynogenesis and are sexual parasites on diploid and  
203 tetraploid populations. Justifying their model from a biological standpoint will require substantial  
204 alteration of the current discussion and should address whether they are invoking gynogenesis in the  
205 origin of cyclostomes/petromyzontids and how this might have transitioned back to a stably meiotic  
206 lineage.

207 We didn’t try to justify our model by mentioning the hexaploidization in carp. We have mentioned  
208 several cases of documented hexaploidization in vertebrates for facilitating discussions from a



209 biological standpoint, as in this reviewer comment. At present, we do not have sufficient information  
210 for discussing the possibility of gynogenesis in cyclostomes, but we thank Reviewer 2 for raising  
211 this interesting point for future discussion.

212

213 **[R2 Comment 07]** 7) The authors state “Although several recent studies supported the ancient origin  
214 of microchromosomes, it was still unknown (1) if chromosomal features characteristic to modern  
215 avian microchromosomes (i.e. high GC content, high gene density and high recombination rate)  
216 were already present in the ancestral gnathostome genome” although this seems to not  
217 acknowledge analyses of the spotted gar genome that resolved many of these feature for the  
218 ancestral euteostome, which is only ~40 million years divergent from the ancestral gnathostome  
219 they are reconstructing (Braasch, et al. *Nat Genet*, 2016).

220 As Reviewer 2 mentioned, the phylogenetic distance seems very short between proto-gnathostome  
221 (jawed vertebrate) and proto-euteleostome (bony vertebrate). However, it was not obvious if two  
222 phylogenetically close lineages share the same chromosomal features, especially when chromosomal  
223 structures do not evolve at a constant rate. We acknowledge that Braasch and colleagues had made a  
224 significant progress, as we had already mentioned in Supplementary Information Section 4.1 of the  
225 previously submitted manuscript. In the revised manuscript, we have amended the main text as  
226 below and added the citation of [Braasch et al., *Nat Genet* (2016)].

227 "Although several recent studies supported the ancient origin of microchromosomes (for example, a  
228 comparison between the chicken and spotted gar genomes suggested that the origin of  
229 microchromosomes goes back to the ancestral bony vertebrate [Braasch et al. *Nat Genet* (2016)]), ..."

230

231 Additionally, the spotted gar genome paper is not cited at all despite use of the assembly for their  
232 reconstructions.

233 Some of the genomes used in our reconstructions were cited only in Supplementary Information due  
234 to space limitation, but we have now added references for the chicken and spotted gar genomes in  
235 the revised main text.

236

237 **[R2 Comment 08]** 8) The authors state “In order to verify the timing of the gnathostome-cyclostome  
238 divergence with respect to 1R and 2R, we performed an analysis based off Ensembl gene trees on the  
239 reconstructed chromosomes ...” These analyses should be re-done from scratch as ENSEMBL trees  
240 are forced to a pre-defined topology (with lamprey splits specifically designated as basal  
241 gnathostome splits) and are therefore cannot be directly used to perform the tests. This is laid out in  
242 (Smith et al. *Nat Genet*, 2013), but has been notably been erroneously used by others to test similar  
243 ideas to those presented in this manuscript.

244 Ensembl Compara actually utilizes a tree inference method that reconciles a gene tree and a species

245 tree (thus the description “forced to a pre-defined topology” is inaccurate), and it is fine to assume  
246 that lamprey diverged from the base of gnathostomes. As suggested by Reviewer 2, we have now  
247 additionally performed a gene tree analysis in which trees were inferred from sequence alignments  
248 without using species trees. We used the resulting trees to plot vertebrate-specific and cyclostome-  
249 specific paralogs on the proto-cyclostome genome and examined if the cyclostome-specific paralogs  
250 were enriched between certain chromosome pairs (Supplementary Figure S13). The result was  
251 largely consistent with our previous gene tree analyses (Supplementary Figures S10–S12), and thus  
252 our conclusions remain unchanged. The method is described in Supplementary Information Section  
253 5.1, and the results are presented as Supplementary Figure S13 as shown below.

254

255 Supplementary Information Section 5.1

256 “**D.** Confirmation by gene tree inference with RAxML without using Ensembl gene trees. We  
257 excluded *P. marinus* in Step 3, and inferred gene trees from the alignments in Step 2 (using RAxML  
258 with the WAG substitution matrix, instead of just inserting lamprey genes into Ensembl gene trees  
259 using RAxML-EPA). To exclude tandem duplications and partially annotated genes, we retained  
260 only one-to-one orthologues between Japanese lamprey and sea lamprey (i.e. a pair of lamprey genes  
261 are one-to-one orthologues if the two lamprey genes are only descendants of their common ancestor  
262 node). The result is shown in Figure S13.”

263

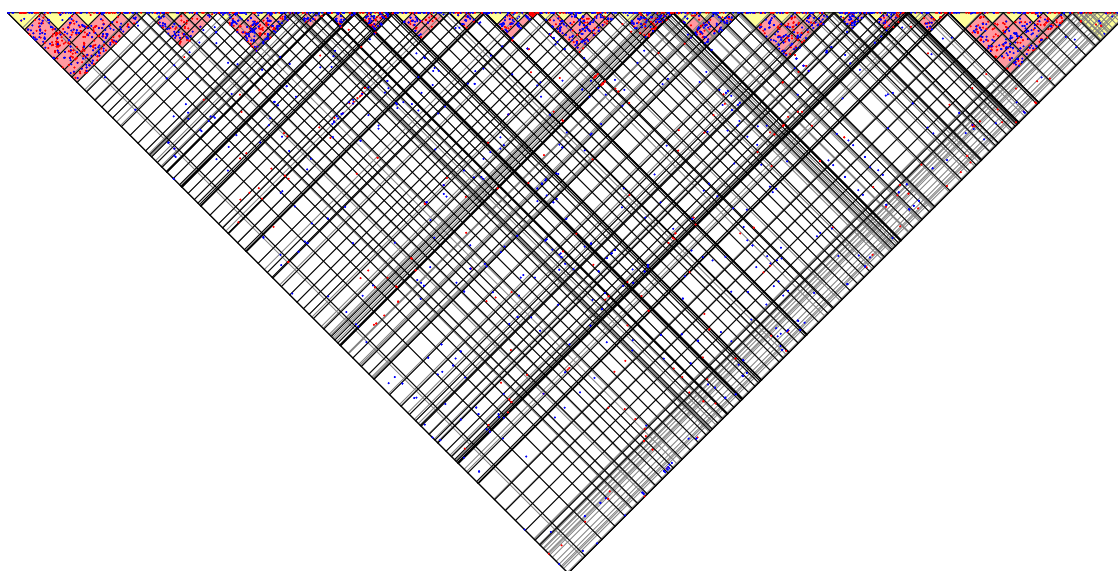

264

265 **Figure S13.** Distribution of Japanese lamprey paralogs annotated using gene trees inferred by  
266 RAxML. Instead of inserting lamprey genes into existing Ensembl gene trees using RAxML-EPA,  
267 gene trees were inferred using RAxML with the WAG matrix, and one-to-one orthologues between  
268 Japanese lamprey and sea lamprey were retained for paralogue annotation.

269

270

271 To address the concerns raised by Reviewer 2 on the reliability of gene tree analysis, we have  
272 revised the paragraph of gene tree analysis in the main text as shown below. In short, we enumerated  
273 possible interpretations of our observations, and deleted the supplementary section on the possibility  
274 of hybridizations between genetically diverse subpopulations. Those discussions only showed  
275 possible interpretations of our results, so the current revisions do not affect the results and  
276 conclusions of our manuscript.

277

278 “In order to verify the timing of duplications and the gnathostome-cyclostome divergence, we  
279 performed gene tree analyses by inserting lamprey genes into Ensembl gene trees or re-computing  
280 the gene trees (see Supplementary Section 5). Then, we classified human and lamprey paralogue  
281 pairs by their duplication timing and plotted vertebrate paralogues (i.e. paralogues duplicated before  
282 the gnathostome-cyclostome split), gnathostome-specific paralogues and cyclostome-specific  
283 paralogues on the proto-gnathostome and proto-cyclostome genomes (Supplementary Figs. S9–S15).  
284 Intriguingly, we observed a mixture of vertebrate paralogues and cyclostome-specific paralogues  
285 between most pairs of homoeologous proto-cyclostome chromosomes, making it difficult to  
286 conclusively determine the duplication timing of individual chromosomes. This observation may be  
287 explained by (1) difficulties in gene tree inference due to the high GC content and strong codon bias  
288 in the lamprey genomes<sup>22,26,33</sup>, (2) differential gene loss between cyclostome and gnathostome  
289 lineages<sup>29</sup>, (3) delayed rediploidization<sup>28,31,32</sup> creating cyclostome-specific paralogues between proto-  
290 cyclostome chromosomes duplicated by 1R, and (4) tetraploidization through hybridization and  
291 doubling<sup>54-56</sup>, which may have created both vertebrate-specific and cyclostome-specific paralogues  
292 due to recurrent hybridization among genetically diverse subpopulations<sup>54,55</sup> and subsequent genetic  
293 drift<sup>57</sup>. Although these factors may have obscured the duplication timing, the presence of  
294 chromosome pairs enriched either with vertebrate-specific paralogues or cyclostome-specific  
295 paralogues is consistent with the model that the proto-cyclostome lineage diverged from the proto-  
296 gnathostome lineage shortly after 1R.”

297

298 **[R2 Comment 09]** 9) The authors should present, in the main manuscript, more detail regarding the  
299 numbers and distribution of ohnologs (and other duplicates) across presumptive paralogous  
300 segments (particularly those in Figure 6d/e/g). This is essential to evaluating evidence favoring  
301 duplication vs fission in the origin of these segments, which is in turn essential for evaluating  
302 evidence as it relates to proposed duplication scenarios (both gnathostome and cyclostome).

303 We have already presented distributions of paralogs and orthologs among reconstructed  
304 chromosomes comprehensively in Figures 2, 3, 4, Supplementary Figures S7, S9, S10, S11, S12,

305 S13, S14 and S15. These figures provide essential information for evaluating the accuracy of our  
 306 reconstructions. Please also see our response to [R2 Comment 11] below.  
 307  
 308 The table below shows the numbers of paralogs between pairs of proto-gnathostome chromosomes.  
 309 The four numbers in each cell indicate human, chicken, spotted gar, and elephant shark paralogs.  
 310 Empty cells indicate no paralogs. (Please magnify this file to see the numbers. Old versions of Word  
 311 might not be able to display the tables as vector graphics.)

Pgc1 14x12  
 Pgc2 14x12  
 Pgc3 14x12  
 Pgc4 14x12  
 Pgc5 14x12  
 Pgc6 14x12  
 Pgc7 14x12  
 Pgc8 14x12  
 Pgc9 14x12  
 Pgc10 14x12  
 Pgc11 14x12  
 Pgc12 14x12  
 Pgc13 14x12  
 Pgc14 14x12  
 Pgc15 14x12  
 Pgc16 14x12  
 Pgc17 14x12  
 Pgc18 14x12  
 Pgc19 14x12  
 Pgc20 14x12  
 Pgc21 14x12  
 Pgc22 14x12  
 Pgc23 14x12  
 Pgc24 14x12  
 Pgc25 14x12  
 Pgc26 14x12  
 Pgc27 14x12  
 Pgc28 14x12  
 Pgc29 14x12  
 Pgc30 14x12  
 Pgc31 14x12  
 Pgc32 14x12  
 Pgc33 14x12  
 Pgc34 14x12  
 Pgc35 14x12  
 Pgc36 14x12  
 Pgc37 14x12  
 Pgc38 14x12  
 Pgc39 14x12  
 Pgc40 14x12  
 Pgc41 14x12  
 Pgc42 14x12  
 Pgc43 14x12  
 Pgc44 14x12  
 Pgc45 14x12  
 Pgc46 14x12  
 Pgc47 14x12  
 Pgc48 14x12  
 Pgc49 14x12  
 Pgc50 14x12  
 Pgc51 14x12  
 Pgc52 14x12  
 Pgc53 14x12  
 Pgc54 14x12  
 Pgc55 14x12  
 Pgc56 14x12  
 Pgc57 14x12  
 Pgc58 14x12  
 Pgc59 14x12  
 Pgc60 14x12  
 Pgc61 14x12  
 Pgc62 14x12  
 Pgc63 14x12  
 Pgc64 14x12  
 Pgc65 14x12  
 Pgc66 14x12  
 Pgc67 14x12  
 Pgc68 14x12  
 Pgc69 14x12  
 Pgc70 14x12  
 Pgc71 14x12  
 Pgc72 14x12  
 Pgc73 14x12  
 Pgc74 14x12  
 Pgc75 14x12  
 Pgc76 14x12  
 Pgc77 14x12  
 Pgc78 14x12  
 Pgc79 14x12  
 Pgc80 14x12  
 Pgc81 14x12  
 Pgc82 14x12  
 Pgc83 14x12  
 Pgc84 14x12  
 Pgc85 14x12  
 Pgc86 14x12  
 Pgc87 14x12  
 Pgc88 14x12  
 Pgc89 14x12  
 Pgc90 14x12  
 Pgc91 14x12  
 Pgc92 14x12  
 Pgc93 14x12  
 Pgc94 14x12  
 Pgc95 14x12  
 Pgc96 14x12  
 Pgc97 14x12  
 Pgc98 14x12  
 Pgc99 14x12  
 Pgc100 14x12

312 The table below shows the numbers of paralogs between pairs of proto-cyclostome chromosomes.  
 313 The two numbers in each cell indicate Japanese lamprey and sea lamprey paralogs. Empty cells  
 314 indicate no paralogs. (Please magnify this file to see the numbers.)  
 315

Pgc101 14x12  
 Pgc102 14x12  
 Pgc103 14x12  
 Pgc104 14x12  
 Pgc105 14x12  
 Pgc106 14x12  
 Pgc107 14x12  
 Pgc108 14x12  
 Pgc109 14x12  
 Pgc110 14x12  
 Pgc111 14x12  
 Pgc112 14x12  
 Pgc113 14x12  
 Pgc114 14x12  
 Pgc115 14x12  
 Pgc116 14x12  
 Pgc117 14x12  
 Pgc118 14x12  
 Pgc119 14x12  
 Pgc120 14x12  
 Pgc121 14x12  
 Pgc122 14x12  
 Pgc123 14x12  
 Pgc124 14x12  
 Pgc125 14x12  
 Pgc126 14x12  
 Pgc127 14x12  
 Pgc128 14x12  
 Pgc129 14x12  
 Pgc130 14x12  
 Pgc131 14x12  
 Pgc132 14x12  
 Pgc133 14x12  
 Pgc134 14x12  
 Pgc135 14x12  
 Pgc136 14x12  
 Pgc137 14x12  
 Pgc138 14x12  
 Pgc139 14x12  
 Pgc140 14x12  
 Pgc141 14x12  
 Pgc142 14x12  
 Pgc143 14x12  
 Pgc144 14x12  
 Pgc145 14x12  
 Pgc146 14x12  
 Pgc147 14x12  
 Pgc148 14x12  
 Pgc149 14x12  
 Pgc150 14x12  
 Pgc151 14x12  
 Pgc152 14x12  
 Pgc153 14x12  
 Pgc154 14x12  
 Pgc155 14x12  
 Pgc156 14x12  
 Pgc157 14x12  
 Pgc158 14x12  
 Pgc159 14x12  
 Pgc160 14x12  
 Pgc161 14x12  
 Pgc162 14x12  
 Pgc163 14x12  
 Pgc164 14x12  
 Pgc165 14x12  
 Pgc166 14x12  
 Pgc167 14x12  
 Pgc168 14x12  
 Pgc169 14x12  
 Pgc170 14x12  
 Pgc171 14x12  
 Pgc172 14x12  
 Pgc173 14x12  
 Pgc174 14x12  
 Pgc175 14x12  
 Pgc176 14x12  
 Pgc177 14x12  
 Pgc178 14x12  
 Pgc179 14x12  
 Pgc180 14x12  
 Pgc181 14x12  
 Pgc182 14x12  
 Pgc183 14x12  
 Pgc184 14x12  
 Pgc185 14x12  
 Pgc186 14x12  
 Pgc187 14x12  
 Pgc188 14x12  
 Pgc189 14x12  
 Pgc190 14x12  
 Pgc191 14x12  
 Pgc192 14x12  
 Pgc193 14x12  
 Pgc194 14x12  
 Pgc195 14x12  
 Pgc196 14x12  
 Pgc197 14x12  
 Pgc198 14x12  
 Pgc199 14x12  
 Pgc200 14x12

316 The above two tables are included in Supplementary Data 1 as a PDF document  
 317 (ChromosomeStatistics.pdf).  
 318  
 319

320 The authors should be able to gain some inspiration as to how to do this by looking at another paper  
321 that is generally similar to this one (Simakov, et al. *Nat Ecol Evol* 2020: Fig 3, 4b) and even improve  
322 upon that presentation.

323 Actually Simakov et al. (*Nat Ecol Evol* 2020) have not presented the numbers of paralogs among  
324 reconstructed chromosomes. Figure 3 in [Simakov et al., *Nat Ecol Evol* (2020)] shows only the  
325 reconstructed chromosomes and the numbers of genes. In our manuscript, the corresponding  
326 information is presented as Supplementary Figure S7. Figure 4b in [Simakov et al., *Nat Ecol Evol*  
327 (2020)] shows biased rates of gene retention between the two subgenomes. In our manuscript, the  
328 corresponding information is presented as Figure 6e and Supplementary Figure S7.

329

330 In fact, tables of paralogs were not presented in previous lamprey genome papers [Smith et al., *Nat*  
331 *Genet* (2013); Smith and Keinath, *Genome Res* (2015); Smith et al., *Nat Genet* (2018)] nor in  
332 previous reconstruction papers [Nakatani et al., *Genome Res* (2007); Putnam et al., *Nature* (2008);  
333 Sacerdot et al., *Genome Biol* (2018)] including Simakov et al. *Nat Ecol Evol* (2020), because long  
334 and complicated tables of numbers are uninformative and unhelpful for readers. Instead, previous  
335 papers presented figures plotting orthologs and paralogs so that synteny evidence can be examined  
336 visually. This is how developers of reconstruction programs check the accuracy and performance of  
337 their code. We have already presented Figures 2, 3, 4, Supplementary Figures S7, S9, S10, S11, S12,  
338 S13, S14 and S15, and we believe that such visualization is the key to evaluating the accuracy of our  
339 reconstructions and reliability of evolutionary scenarios. We also provided reconstruction  
340 information as Supplementary Data 1, which makes it easy to confirm the numbers of genes,  
341 orthologs, paralogs, etc. in more detail.

342

343 I requested something similar in the previous review (and prior to seeing the Simakov paper) but this  
344 request was not satisfactorily addressed, and the revision makes the need for this even clearer.

345 In our previous response to reviewer comments, we had presented a table showing the number of  
346 genes and orthologs as requested by Reviewer 2 (see our response to Comment 14 in the previous  
347 review). The same information had already been visualized as Supplementary Figure S4 and S7 in  
348 the manuscript, which we consider to be more informative than a long table of numbers. Please also  
349 see our response to [R2 Comment 11] below.

350

351 **[R2 Comment 10]** 10) Given that the Simakov paper was released after the initial submission of this  
352 manuscript it may be unfair to require that the authors consider the specific models proposed by that  
353 paper, but I am certain readers will welcome it and perhaps expect it. Details of these reconstructions  
354 differ in profound ways.

355 Supplementary Table 7 in [Simakov et al., *Nat Ecol Evol* (2020)] shows one-to-one correspondence

356 between the reconstruction in [Simakov et al., *Nat Ecol Evol* (2020)] and the reconstruction in  
 357 [Putnam et al., *Nature* (2008)]. We have presented a comparison between our reconstruction and the  
 358 reconstructions in [Putnam et al., *Nature* (2008)] and [Simakov et al., *Nat Ecol Evol* (2020)] in  
 359 Supplementary Table S9 (reproduced below), and discussed the differences in Supplementary  
 360 Information Section 3.2.4.

| <b>This study</b> | <b>Putnam <i>et al.</i></b> | <b>Sacerdot <i>et al.</i></b> | <b>Simakov <i>et al.</i></b> | <b>Scallop</b> |
|-------------------|-----------------------------|-------------------------------|------------------------------|----------------|
| Pvc1              | CLG16                       | chr1                          | CLGB                         | chr15,18,19    |
| Pvc2              | CLG3                        | chr10                         | CLGD                         | chr1           |
| Pvc3              | CLG4                        | chr11                         | CLGJ                         | chr5,10        |
| Pvc4              | CLG5                        | chr12                         | CLGK                         | chr2           |
| Pvc5              | CLG10                       | chr17                         | CLGP                         | chr11          |
| Pvc6              | CLG9                        | chr16                         | CLGN                         | chr17          |
| Pvc7              | CLG8                        | chr15                         | CLGF                         | chr8           |
| Pvc8              | CLG6                        | chr14                         | CLGQ                         | chr6           |
| Pvc9              | CLG7                        | chr14                         | CLGI                         | chr4           |
| Pvc10             | CLG13                       | chr5                          | CLGE                         | chr7           |
| Pvc11             | CLG14                       | chr6                          | CLGO                         | chr2,16        |
| Pvc12             | CLG15                       | chr4                          | CLGH                         | chr6           |
| Pvc13             | CLG2                        | chr7                          | CLGC                         | chr12,14       |
| Pvc14             | CLG1                        | chr8                          | CLGL                         | chr5           |
| Pvc15             | CLG12                       | chr9                          | CLGM                         | chr15          |
| Pvc16             | CLG17                       | chr2                          | CLGG                         | chr9           |
| Pvc17             | CLG11                       | chr3                          | CLGA                         | chr3           |
| Pvc18             | CLG11                       | chr13                         | CLGA                         | chr13          |

361  
 362

363 [\[R2 Comment 11\]](#) 11) Related to the above comments, please also provide numbers of orthologs  
 364 that support each of the conserved segments in Figure 6E and 6G (after addressing other points).  
 365 Presentation in the main manuscript will provide essential detail to the reader.

366 Please see our response to Comment 14 in the previous review. The essential details are shown in  
 367 Supplementary Figure S7, which are more intuitive and informative than the long tables of numbers.  
 368 The table below shows the numbers of human, chicken, spotted gar and elephant shark genes  
 369 mapped to the proto-gnathostome chromosomes and amphioxus orthologs that were mapped to  
 370 corresponding proto-vertebrate chromosomes as visualized in Figure 6e. The order of the proto-  
 371 gnathostome chromosomes corresponds to Figure 6e. This table is included in Supplementary Data  
 372 1.

| Proto-gnathostome | Human genes | Chicken genes | Spotted gar genes | Elephant shark genes | Amphioxus orthologs |
|-------------------|-------------|---------------|-------------------|----------------------|---------------------|
| Pgc1              | 695         | 568           | 1127              | 676                  | 496                 |
| Pgc2              | 335         | 251           | 288               | 306                  | 252                 |
| Pgc3              | 280         | 42            | 227               | 229                  | 194                 |
| Pgc4              | 541         | 471           | 564               | 611                  | 473                 |
| Pgc5              | 413         | 349           | 391               | 436                  | 335                 |
| Pgc6              | 227         | 26            | 0                 | 0                    | 61                  |
| Pgc7              | 774         | 702           | 258               | 802                  | 569                 |
| Pgc8              | 395         | 328           | 362               | 356                  | 278                 |
| Pgc9              | 741         | 600           | 640               | 651                  | 627                 |
| Pgc10             | 268         | 216           | 279               | 298                  | 165                 |
| Pgc11             | 318         | 245           | 281               | 329                  | 207                 |
| Pgc12             | 142         | 85            | 93                | 16                   | 60                  |
| Pgc13             | 498         | 421           | 528               | 515                  | 333                 |
| Pgc14             | 132         | 0             | 201               | 49                   | 117                 |
| Pgc15             | 792         | 635           | 1166              | 836                  | 720                 |
| Pgc16             | 437         | 327           | 361               | 409                  | 343                 |
| Pgc17             | 802         | 702           | 763               | 963                  | 735                 |
| Pgc18             | 444         | 329           | 386               | 415                  | 322                 |
| Pgc19             | 589         | 501           | 529               | 591                  | 400                 |
| Pgc20             | 373         | 118           | 265               | 205                  | 204                 |
| Pgc21             | 333         | 325           | 366               | 393                  | 299                 |
| Pgc22             | 174         | 0             | 130               | 20                   | 90                  |
| Pgc23             | 783         | 687           | 741               | 845                  | 663                 |
| Pgc24             | 303         | 240           | 317               | 329                  | 248                 |
| Pgc25             | 447         | 295           | 306               | 354                  | 290                 |
| Pgc26             | 0           | 0             | 26                | 0                    | 37                  |
| Pgc27             | 389         | 17            | 0                 | 0                    | 35                  |
| Pgc28             | 493         | 398           | 442               | 438                  | 359                 |
| Pgc29             | 332         | 307           | 341               | 366                  | 281                 |
| Pgc30             | 143         | 168           | 144               | 234                  | 128                 |
| Pgc31             | 434         | 380           | 434               | 441                  | 367                 |
| Pgc32             | 268         | 160           | 350               | 0                    | 160                 |
| Pgc33             | 910         | 739           | 790               | 721                  | 644                 |
| Pgc34             | 287         | 237           | 319               | 367                  | 296                 |
| Pgc35             | 562         | 487           | 518               | 565                  | 447                 |
| Pgc36             | 276         | 0             | 187               | 186                  | 123                 |
| Pgc37             | 323         | 272           | 297               | 345                  | 260                 |
| Pgc38             | 215         | 45            | 0                 | 157                  | 53                  |
| Pgc39             | 451         | 341           | 376               | 445                  | 290                 |
| Pgc40             | 429         | 305           | 333               | 334                  | 261                 |
| Pgc41             | 134         | 85            | 44                | 0                    | 81                  |
| Pgc42             | 81          | 7             | 38                | 0                    | 38                  |
| Pgc43             | 614         | 496           | 520               | 547                  | 482                 |
| Pgc44             | 519         | 517           | 569               | 693                  | 504                 |
| Pgc45             | 182         | 0             | 150               | 35                   | 137                 |
| Pgc46             | 371         | 0             | 211               | 59                   | 153                 |
| Pgc47             | 367         | 353           | 0                 | 286                  | 147                 |
| Pgc48             | 236         | 173           | 222               | 201                  | 12                  |
| Pgc49             | 100         | 4             | 120               | 55                   | 2                   |

373

374

375 The table below shows the statistics for the proto-cyclostome chromosomes. This table was presented  
376 in our response to [Comment 14] in the previous review, but we found one amphioxus scaffold was  
377 excluded by mistake. We have fixed the table and presented it below. Each line shows (1) proto-  
378 vertebrate chromosome name (Pvc), (2) number of amphioxus genes mapped to the Pvc, (3) proto-  
379 cyclostome chromosome name (Pcc), (4) number of Japanese lamprey genes mapped to the Pcc, (5)  
380 number of sea lamprey genes mapped to the Pcc, and (6) number of amphioxus genes that are mapped  
381 to the Pvc and are orthologous to lamprey genes mapped to the Pcc. This table is included in  
382 Supplementary Data 1.

| Proto-vertebrate | Amphioxus genes | Proto-cyclostome | Japanese lamprey genes | Sea lamprey genes | Orthologous amphioxus genes |
|------------------|-----------------|------------------|------------------------|-------------------|-----------------------------|
| Pvc1             | 1445            | Pcc1A            | 515                    | 473               | 304                         |
| Pvc1             | 1445            | Pcc1B            | 502                    | 452               | 283                         |
| Pvc1             | 1445            | Pcc1C            | 397                    | 344               | 250                         |
| Pvc1             | 1445            | Pcc1D            | 303                    | 266               | 177                         |
| Pvc1             | 1445            | Pcc1E            | 226                    | 217               | 154                         |
| Pvc1             | 1445            | Pcc1F            | 158                    | 179               | 121                         |
| Pvc2             | 891             | Pcc2A            | 287                    | 326               | 174                         |
| Pvc2             | 891             | Pcc2B            | 252                    | 228               | 167                         |
| Pvc2             | 891             | Pcc2C            | 206                    | 225               | 154                         |
| Pvc2             | 891             | Pcc2D            | 172                    | 177               | 115                         |
| Pvc2             | 891             | Pcc2E            | 155                    | 184               | 78                          |
| Pvc3             | 686             | Pcc3A            | 264                    | 265               | 99                          |
| Pvc3             | 686             | Pcc3B            | 261                    | 234               | 96                          |
| Pvc3             | 686             | Pcc3C            | 237                    | 220               | 89                          |
| Pvc3             | 686             | Pcc3D            | 231                    | 212               | 88                          |
| Pvc3             | 686             | Pcc3E            | 120                    | 131               | 52                          |
| Pvc3             | 686             | Pcc3F            | 62                     | 114               | 47                          |
| Pvc4             | 473             | Pcc4A            | 171                    | 169               | 89                          |
| Pvc4             | 473             | Pcc4B            | 143                    | 171               | 67                          |
| Pvc4             | 473             | Pcc4C            | 127                    | 177               | 66                          |
| Pvc4             | 473             | Pcc4D            | 18                     | 0                 | 1                           |
| Pvc4             | 473             | Pcc4E            | 0                      | 16                | 1                           |
| Pvc4             | 473             | Pcc4F            | 4                      | 4                 | 0                           |
| Pvc5             | 525             | Pcc5A            | 190                    | 201               | 112                         |
| Pvc5             | 525             | Pcc5B            | 189                    | 175               | 96                          |
| Pvc5             | 525             | Pcc5C            | 50                     | 44                | 20                          |
| Pvc5             | 525             | Pcc5D            | 0                      | 38                | 11                          |
| Pvc5             | 525             | Pcc5E            | 10                     | 22                | 6                           |
| Pvc5             | 525             | Pcc5F            | 7                      | 8                 | 2                           |
| Pvc5             | 525             | Pcc5G            | 9                      | 0                 | 1                           |
| Pvc6             | 586             | Pcc6A            | 182                    | 212               | 105                         |
| Pvc6             | 586             | Pcc6B            | 188                    | 171               | 86                          |
| Pvc6             | 586             | Pcc6C            | 108                    | 101               | 55                          |
| Pvc6             | 586             | Pcc6D            | 46                     | 56                | 33                          |
| Pvc6             | 586             | Pcc6E            | 36                     | 26                | 17                          |
| Pvc6             | 586             | Pcc6F            | 0                      | 61                | 9                           |
| Pvc6             | 586             | Pcc6G            | 10                     | 0                 | 0                           |
| Pvc7             | 707             | Pcc7A            | 271                    | 266               | 173                         |
| Pvc7             | 707             | Pcc7B            | 260                    | 271               | 155                         |
| Pvc7             | 707             | Pcc7C            | 124                    | 112               | 66                          |
| Pvc7             | 707             | Pcc7D            | 162                    | 25                | 43                          |
| Pvc7             | 707             | Pcc7E            | 11                     | 0                 | 2                           |
| Pvc7             | 707             | Pcc7F            | 0                      | 10                | 2                           |
| Pvc8             | 420             | Pcc8A            | 276                    | 252               | 130                         |
| Pvc8             | 420             | Pcc8B            | 207                    | 212               | 100                         |
| Pvc8             | 420             | Pcc8C            | 40                     | 32                | 10                          |
| Pvc8             | 420             | Pcc8D            | 15                     | 15                | 4                           |
| Pvc8             | 420             | Pcc8E            | 0                      | 11                | 3                           |
| Pvc8             | 420             | Pcc8F            | 2                      | 4                 | 0                           |
| Pvc9             | 563             | Pcc9A            | 355                    | 344               | 174                         |
| Pvc9             | 563             | Pcc9B            | 277                    | 282               | 159                         |
| Pvc9             | 563             | Pcc9C            | 145                    | 145               | 30                          |
| Pvc9             | 563             | Pcc9D            | 23                     | 0                 | 3                           |
| Pvc10            | 962             | Pcc10A           | 257                    | 240               | 151                         |
| Pvc10            | 962             | Pcc10B           | 252                    | 240               | 148                         |
| Pvc10            | 962             | Pcc10C           | 218                    | 228               | 129                         |
| Pvc10            | 962             | Pcc10D           | 196                    | 205               | 120                         |
| Pvc10            | 962             | Pcc10E           | 172                    | 202               | 115                         |
| Pvc10            | 962             | Pcc10F           | 128                    | 170               | 90                          |
| Pvc11            | 844             | Pcc11A           | 314                    | 296               | 167                         |
| Pvc11            | 844             | Pcc11B           | 225                    | 261               | 126                         |
| Pvc11            | 844             | Pcc11C           | 107                    | 132               | 74                          |
| Pvc11            | 844             | Pcc11D           | 90                     | 80                | 44                          |
| Pvc11            | 844             | Pcc11E           | 58                     | 106               | 39                          |
| Pvc11            | 844             | Pcc11F           | 12                     | 15                | 8                           |
| Pvc11            | 844             | Pcc11G           | 0                      | 28                | 7                           |
| Pvc11            | 844             | Pcc11H           | 16                     | 0                 | 1                           |
| Pvc12            | 798             | Pcc12A           | 366                    | 361               | 181                         |
| Pvc12            | 798             | Pcc12B           | 258                    | 259               | 157                         |
| Pvc12            | 798             | Pcc12C           | 225                    | 246               | 151                         |
| Pvc12            | 798             | Pcc12D           | 157                    | 313               | 113                         |
| Pvc12            | 798             | Pcc12E           | 0                      | 14                | 5                           |
| Pvc13            | 1196            | Pcc13A           | 470                    | 441               | 234                         |
| Pvc13            | 1196            | Pcc13B           | 346                    | 342               | 203                         |
| Pvc13            | 1196            | Pcc13C           | 251                    | 232               | 151                         |
| Pvc13            | 1196            | Pcc13D           | 188                    | 217               | 115                         |
| Pvc13            | 1196            | Pcc13E           | 141                    | 173               | 101                         |
| Pvc13            | 1196            | Pcc13F           | 24                     | 0                 | 9                           |
| Pvc14            | 602             | Pcc14A           | 242                    | 224               | 130                         |
| Pvc14            | 602             | Pcc14B           | 175                    | 187               | 104                         |
| Pvc14            | 602             | Pcc14C           | 85                     | 159               | 53                          |
| Pvc14            | 602             | Pcc14D           | 0                      | 25                | 6                           |
| Pvc15            | 560             | Pcc15A           | 251                    | 239               | 126                         |
| Pvc15            | 560             | Pcc15B           | 164                    | 194               | 99                          |
| Pvc15            | 560             | Pcc15C           | 91                     | 66                | 47                          |
| Pvc15            | 560             | Pcc15D           | 53                     | 96                | 38                          |
| Pvc15            | 560             | Pcc15E           | 33                     | 12                | 20                          |
| Pvc15            | 560             | Pcc15F           | 16                     | 23                | 14                          |
| Pvc15            | 560             | Pcc15G           | 0                      | 31                | 12                          |
| Pvc15            | 560             | Pcc15H           | 11                     | 0                 | 4                           |
| Pvc15            | 560             | Pcc15I           | 4                      | 6                 | 2                           |
| Pvc16            | 689             | Pcc16A           | 283                    | 267               | 180                         |
| Pvc16            | 689             | Pcc16B           | 263                    | 254               | 144                         |
| Pvc16            | 689             | Pcc16C           | 42                     | 9                 | 11                          |
| Pvc16            | 689             | Pcc16D           | 9                      | 12                | 3                           |
| Pvc16            | 689             | Pcc16E           | 0                      | 10                | 3                           |
| Pvc16            | 689             | Pcc16F           | 3                      | 5                 | 2                           |
| Pvc17            | 1282            | Pcc17A           | 491                    | 420               | 291                         |
| Pvc17            | 1282            | Pcc17B           | 326                    | 313               | 203                         |
| Pvc17            | 1282            | Pcc17C           | 302                    | 301               | 184                         |
| Pvc17            | 1282            | Pcc17D           | 298                    | 269               | 182                         |
| Pvc17            | 1282            | Pcc17E           | 295                    | 265               | 173                         |
| Pvc17            | 1282            | Pcc17F           | 140                    | 168               | 108                         |
| Pvc18            | 197             | Pcc18A           | 859                    | 569               | 59                          |



384

385 **[R2 Comment 12]** 11) Related to point 9, and with apologies for the length of this comment, it appears  
386 that the program used for these analyses makes a statistical faux pas in assessing evidence that that  
387 two ancestrally linked segments are derived from fission vs. duplication. If I am interpreting the code  
388 correctly, the authors use a statistically appropriate test to identify segments that have an excess of  
389 shared homologs or ohnologs relative to random. Many of the other studies mentioned in the  
390 manuscript and above others have used similar approaches to although the use of the hypergeometric  
391 distribution for these tests is laudable. However, it appears that the ohnolog statistic is compared to  
392 the ortholog statistic as part of the assessment of whether a segment is likely to be derived from  
393 duplication vs fission which does not really shed light on the question at hand if this is true, and appears  
394 to not be an appropriate use of these values. Though admittedly the code here is a bit hard to follow  
395 given the layout and the supplement seems not to clearly address this. Issues with p-value/ test  
396 probability comparison may not be immediately obvious to the casual observer, but were pointed out  
397 by Fisher and subsequently by many others due to pervasive misuse (a couple of modern  
398 examples: <https://www.ncbi.nlm.nih.gov/pmc/articles/PMC5804470/>, <https://www.tandfonline.com/doi/abs/10.1080/00031305.1996.10474380>).

400 A more appropriate approach might be to compare the observed frequency of duplicates on  
401 presumptive paralogous segments to the distribution of similarly-aged duplicates within conserved  
402 segments. It is necessary to infer that some duplications will be present between fissioned segments  
403 because, 1) intrachromosomal duplication is known to occur frequently, even within the human  
404 population, and 2) intrachromosomal rearrangements have effectively randomized gene orders over  
405 the timescales that are analyzed here; one would expect that two pieces of a fissioned chromosome  
406 will carry paralogs that are derived from ancient intrachromosomal duplications (i.e. not WGDs).

407 Therefore, one should be able specifically test whether the presumptive WGD paralogous segments  
408 carry more duplicates than would be expected for the average fission event. A test like this is seemingly  
409 critical given the definitive statements that are made throughout the manuscript.

410 Perhaps also clearly state in the methods how duplication are differentiated from fissions, especially  
411 if I have made some error in interpretation here.

412 As described in Supplementary Information Section 3.3, we defined the proto-cyclostome and proto-  
413 gnathostome chromosomes by the optimal set partition with the most non-random distribution of  
414 paralogs and orthologs. The underlying assumption is that genome rearrangements increase  
415 randomness by scattering the distribution of paralogs, and the most non-random configuration  
416 represents the ancestral genome organization [Nakatani et al., *Genome Res* (2007); Muffato, PhD  
417 Thesis (2010)]. Following this idea, we defined nonrandomness as described in Supplementary  
418 Information Section 3.3 and used it as our optimization criterion, but other researchers may choose  
419 different optimization criteria (including the ‘more appropriate approach’ suggested by Reviewer 2).

420 In this step, we didn't perform hypothesis testing. Ortholog information is necessary, for example, for  
421 assigning human HoxA and mouse HoxA to the same proto-gnathostome chromosome. Otherwise we  
422 might get a proto-gnathostome chromosome with human HoxA and mouse HoxB, and another proto-  
423 gnathostome chromosome with human HoxB and mouse HoxA. In addition, ortholog information is  
424 helpful for correctly assigning short segments with few paralogs to the correct proto-gnathostome  
425 chromosomes. For example, if a short mouse segment with no paralogs is orthologous to a large human  
426 segment, we can find the optimal assignment of the mouse segment through the paralog information  
427 of the orthologous human segment.

428

429 In our reconstruction program, hypothesis testing was performed when we identify significantly  
430 paralogous segment pairs and significantly orthologous segment pairs with  $p < 10^{-5}$  (see  
431 Supplementary Information Sections 3.3.1 and 3.3.2). In this step, a conservative threshold was chosen  
432 because identification of a small number of clearly paralogous and clearly orthologous segment pairs  
433 was sufficient for reducing the search space and computation time (see Supplementary Information  
434 Section 3.3). We would like to emphasize that the purpose of this step is reduction of computation  
435 time and not classification of all segment pairs into duplication pairs and fission pairs accurately.

436

437 Reviewer 2 suggested using only intra-segment paralog frequency to classify segment pairs into  
438 duplicate pairs and fission pairs. In reality it doesn't work because many of partially annotated genes  
439 tend to be classified incorrectly as paralogs. In addition, it is important to recognize that not all  
440 duplicated segment pairs share significantly large numbers of paralogs, especially when multiple  
441 rounds of WGD are involved, as previously discussed in [Simillion et al., *PNAS* (2002); Vandepoele  
442 et al., *Trends Genet* (2002)]. Even in such cases, the true paralogy can be detected by a multi-way  
443 comparison of multiple paralogous segments from multiple species [Simillion et al., *Genome Res*  
444 (2004); Van de Peer, *Nat Rev Genet* (2004)]. Our reconstruction method addressed these issues  
445 (including the presence of paralogs between fission segments) by optimizing the non-random  
446 distribution of orthologs and paralogs through set partitioning of multiple segments from multiple  
447 species (Supplementary Information Section 3.3).

448

449 As for classification of fission and duplication, we admit that there can be difficult cases.

450 **Example:** Suppose that an entire chromosome arm (arm1) of chr1 was duplicated, producing  
451 "arm1+arm2+arm1" chromosome. If this chromosome undergoes fission into "arm1+arm2"  
452 chromosome and "arm1" chromosome, we should observe a large number of paralogs between  
453 "arm1+arm2" and "arm1" chromosomes. We call it duplication of chr1 into "arm1+arm2" and  
454 "arm1" chromosomes.

455 Thus, we should be aware of the possibility that not all fissions are classified as fissions. In our analysis,  
456 we reconstructed proto-cyclostome chromosomes and proto-gnathostome chromosomes as described  
457 in Supplementary Information Section 3.3, and if two segments on different chromosomes in a genome  
458 are mapped to the same proto-cyclostome chromosome or the same proto-gnathostome chromosome,  
459 they are considered to be created by fission or translocation from the proto-cyclostome or proto-  
460 gnathostome chromosome. Fissions between 1R and 2R can be detected by comparison with outgroup  
461 genomes as we mentioned in our response to Comment 15 in the previous round of review (see also  
462 [Nakatani et al., *Genome Res* (2007)]), although we found no fissions between 1R and 2R.

463

464 Finally, we would like to emphasize that our conclusions remain unchanged even if some of the  
465 reconstructed proto-cyclostome chromosomes were actually created by fission, for the following  
466 reasons. First, even if a small number of reconstructed proto-cyclostome chromosomes may have been  
467 created by fission, paralog plots (Supp Figs. S9–15) show most of the chromosomes are likely to have  
468 been created by duplication. Second, as we have already discussed in the main text (see our response  
469 to Comment 22 in the previous round of review), smaller proto-cyclostome chromosomes are less  
470 reliable and some of them may have been reconstructed inaccurately. Nevertheless, our conclusion of  
471 cyclostome-specific hexaploidization remains unchanged since the conclusion is supported by the  
472 reconstruction as a whole (e.g. supported by the clear peak of multiplicity at six). Third, our statistical  
473 analysis for testing chromosome-scale duplication scenarios (see our response to [R2 Comment 04]  
474 above) is not affected if individual chromosomes were created by duplication or by fission. Since it is  
475 statistically unlikely that the chromosome number increased one-by-one, the observed convergence of  
476 multiplicity should be explained by a biological mechanism through which all chromosomes were  
477 broken into multiple parts simultaneously or duplicated simultaneously. Since there is no such  
478 mechanism like whole-genome fission, we conclude that the proto-cyclostome genome was shaped by  
479 polyploidization.

480

481 [\[R2 Comment 13\] 12\) The supplemental movie seems to show progress in defining clusters in the](#)  
482 [cyclostome-centric analysis?? But does not really seem to shed much light into the inner workings of](#)  
483 [the programs they use.](#)

484 The supplementary movie is provided as an additional resource and visualizes the essential idea  
485 behind the algorithm (please see [Nakatani et al., *Genome Res* (2007); Muffato, PhD Thesis (2010)]  
486 and Supplementary Information Section 8 for details). We would like to thank Reviewer 2 again for  
487 reviewing our code in detail.

488

489 In addition to the revisions described above, we have revised Supplementary Data 1, because some  
490 data files were missing in the previously submitted version (i.e. we added orthologs from elephant

491 shark to human, mouse, dog, opossum). We have also updated Figure 6, since one proto-gnathostome  
492 chromosome was missing in the previous version. In addition, we have corrected some spelling errors  
493 (e.g. paralog/paralogue) including Figures 4 and 5, and have replaced raster images with vector  
494 graphics in Figure 4.

495

496 **[R2 Comment 14]** Given these large issues I will withhold comment on other specific details (e.g.  
497 discussions of immunology, discussion of ancient hybridization – or alternately incomplete lineage  
498 sorting - in the supplement) for the moment since many details could change depending on how  
499 these above comments are addressed. I am certain that all of these requests can be addressed with  
500 statistical rigor and in a way that facilitates reproducibility. I hope that the comments above make  
501 that easier.

502

503 The discussion of hybridizations between genetically diverse subpopulations is only briefly mentioned  
504 in the current revision (due to our response to [R2 Comment 08] above), and a more detailed discussion  
505 in the previously submitted Supplementary Information was deleted in the current revision to avoid  
506 additional rounds of peer-review. To avoid possible confusions between our actual results and the  
507 general discussions, we also made a minor revision to Figure 6 and deleted the information about  
508 immune complexes in the proto-gnathostome genome, so that Results and Discussion sections are  
509 clearly separated and the texts on the origin of the immune complexes are now restricted to Discussion  
510 section.

511

512 As discussed in our responses above, essentially there are no changes to our results and conclusions.  
513 Furthermore, we have deleted detailed discussion about hybridization and removed the mention of  
514 immune system genes in Results section. As such we believe there is no need to further revise the  
515 current manuscript, including any of the subjects mentioned by the reviewer in [R2 Comment 14].

516

517

518 **Reviewer #3 (Remarks to the Author):**

519 I wanted to congratulate the authors for their efforts addressing the extensive comments from all the  
520 reviewers. I sincerely think that a manuscript that was already great has improved a lot.

521 We thank the reviewer for the kind words. We are pleased that the reviewer finds the manuscript is of  
522 great quality.

523

524

525 **References:**

526 Braasch, I. et al. The spotted gar genome illuminates vertebrate evolution and facilitates human-teleost  
527 comparisons. *Nat Genet* 48, 427–437 (2016).

528 Dehal, P. & Boore, J. L. Two rounds of whole genome duplication in the ancestral vertebrate. *PLoS*  
529 *Biol* 3, e314 (2005).

530 Fontana, F. et al. Evidence of hexaploid karyotype in shortnose sturgeon. *Genome* 51, 113–119 (2008).

531 Muffato, M. Reconstruction de génomes ancestraux chez les vertébrés. (Université d'Evry-Val  
532 d'Essonne, 2010).

533 Nakatani, Y., Takeda, H., Kohara, Y. & Morishita, S. Reconstruction of the vertebrate ancestral  
534 genome reveals dynamic genome reorganization in early vertebrates. *Genome Res* 17, 1254–  
535 1265 (2007).

536 Nakatani, Y. & McLysaght, A. Genomes as documents of evolutionary history: a probabilistic  
537 macrosynteny model for the reconstruction of ancestral genomes. *Bioinformatics* 33, i369–  
538 i378 (2017).

539 Pascual-Anaya, J. et al. Hagfish and lamprey Hox genes reveal conservation of temporal colinearity  
540 in vertebrates. *Nat Ecol Evol* 2, 859–866 (2018).

541 Putnam, N. H. et al. Sea anemone genome reveals ancestral eumetazoan gene repertoire and genomic  
542 organization. *Science* 317, 86–94 (2007).

543 Putnam, N. H. et al. The amphioxus genome and the evolution of the chordate karyotype. *Nature* 453,  
544 1064–1071 (2008).

545 Simakov, O. et al. Deeply conserved synteny resolves early events in vertebrate evolution. *Nat Ecol*  
546 *Evol* 4, 820–830 (2020).

547 Simillion, C., Vandepoele, K., Van Montagu, M. C. E., Zabeau, M. & Van de Peer, Y. The hidden  
548 duplication past of Arabidopsisthaliana. *PNAS* 99, 13627–13632 (2002).

549 Simillion, C., Vandepoele, K., Saeys, Y. & Van de Peer, Y. Building Genomic Profiles for Uncovering  
550 Segmental Homology in the Twilight Zone. *Genome Res* 14, 1095–1106 (2004).

551 Smith, J. J. et al. Sequencing of the sea lamprey (*Petromyzon marinus*) genome provides insights into  
552 vertebrate evolution. *Nat Genet* 45, 415–421 (2013).

553 Smith, J. J. & Keinath, M. C. The sea lamprey meiotic map improves resolution of ancient vertebrate  
554 genome duplications. *Genome Res* 25, 1081–1090 (2015).

555 Smith, J. J. et al. The sea lamprey germline genome provides insights into programmed genome  
556 rearrangement and vertebrate evolution. *Nat Genet* 50, 270–277 (2018).

557 Symonová, R. et al. Molecular cytogenetic differentiation of paralogs of Hox paralogs in duplicated  
558 and re-diploidized genome of the North American paddlefish (*Polyodon spathula*). *BMC Genet*  
559 18, 19 (2017).

560 Trifonov, V. A. et al. Evolutionary plasticity of acipenseriform genomes. *Chromosoma* 125, 661–668  
561 (2016).

- 562 Van de Peer, Y. Computational approaches to unveiling ancient genome duplications. *Nat Rev Genet*  
563 5, 752–763 (2004).
- 564 Vandepoele, K., Simillion, C. & Van de Peer, Y. Detecting the undetectable: uncovering duplicated  
565 segments in Arabidopsis by comparison with rice. *Trends Genet* 18, 606–608 (2002).
- 566

Reviewers' Comments:

Reviewer #2:

Remarks to the Author:

Please see attachment

The clarity of the manuscript is much improved and I am glad to see that the authors seem to be interested in moving toward open source sharing of their program in line with modern reporting standards. I am also heartened to see that the authors have adopted a hypothesis testing framework that can be used to assess the validity of alternate models. I think there is room for expansion/modification of this test and a few additional points that should be addressed prior to publication. These are outlined in more detail below.

- 1) Code sharing – The authors should discuss this with the editor, ideally the code would be released on GitHub or similar, but it is stated that “the reconstruction software/code is available on request.” due to apparent copyright issues. I looked at the link the authors sent and it seems like there are several solutions to release (<http://numerical.recipes/licenses/redistribute.html>), perhaps it can be better explained why this is not possible in this instance and why Netlib would not be a solution. In general, I am happy to defer to the editor here in determining the correct course of action here.
  
- 2) Code sharing – I understand that the issue with DoveTail is problematic. In the cases that I am familiar with as a reviewer (Nature, NG, Genome research ..) or Author (one of the Nature Genetics articles cited in their letter) DoveTail data have been reanalyzed using another program or heavily vetted with an orthogonal method. Perhaps the editor could consult with Dr Henry Gee on policies related to non-open source assemblers. I understand there is likely little the authors can do themselves to resolve this issue so I do not anticipate an author response to this bullet.
  
- 3) I applaud the authors for identifying a statistical test to assess alternatives to the hexaploidization and would strongly recommend that they expand the tests to consider a broader range of possibilities. In addition, the pattern of presumptive paralog retention in lampreys still needs some attention. Specifically, the chromosomes that retain zero (or close to zero) homologs with the presumptive pre-1R ancestor. I apologize for missing the table with these data in the earlier rebuttals, but did not find it in the previous supplement and the information was

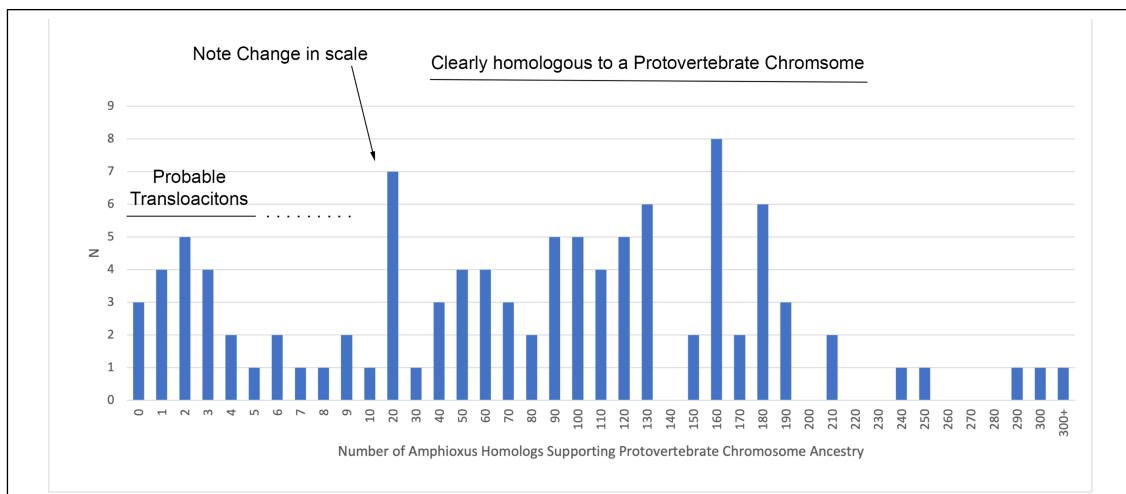



not integrated into the main text figure as requested. To make my concern a bit clearer, I am including a quick figure to illustrate the issue (generated from their supplemental table). Specifically, many of the chromosomes annotated as duplicates of a PVC have very small numbers (even zero) of genes that are ohnologous to the reconstructed PVCs, at least as it can be understood in the context of amphioxus homologs (not to mention reciprocal zeros across lamprey segments). Notably, these form a distribution of homolog counts that appears to be distinct from the broader distribution (and does not include six missing chromosomes – or 11 if PVC18 is counted – marked with hashes in Figure 6). Considering the possibility that chromosomal segments with small numbers of homologs are the product of translocations or other small events, the observed deviation “D” as used in their statistical tests should probably be  $13+19=32$  if they wanted to perform a minimally conservative test and perhaps also the 5 missing PVG18 chromosomes ( $D=37$ ,  $K=18$ ) if they wanted consider other conservative tests. The tests with  $K=5$  seem unjustifiably biased. Furthermore, the authors should permit duplications to occur before, between and after WGDS in a single model, and/or groups of models. Finally, in text reporting of p-values should include all hypotheses, not just a single test with a low p-value. It is not clear why the P reported in the main text was chosen versus say model C which is marginally rejected with  $D=13$ .

- 4) A similar test can and should be used to test for loss/degradation of chromosomes following their hexaploidization model. Although p-values cannot be directly compared to the above-mentioned tests, this would give the readers a better sense of the degree to which their model fits larger patterns observed in their data. Similar comparisons could also be performed on gnathostome duplications, though these might be difficult to execute given their reconstruction method.
- 5) As part of their argument for downplaying non-WGD mechanisms in this manuscript, the authors state in their reply that “Since there is no such mechanism like whole-genome fission, we conclude that the proto-cyclostome genome was shaped by polyploidization”. In conceptualizing the potential influence of fissions or other small events the authors should more carefully consider karyotype variation in mammals (for example <https://pubmed.ncbi.nlm.nih.gov/3073914/> and <https://pubmed.ncbi.nlm.nih.gov/15004472/> ) and the degree to which these mirror both aspects the lamprey karyotype (large numbers of small acrocentrics) and details of the author’s reconstructions.
- 6) Line 189 - “Importantly, the algorithm explores all alternative models including segmental duplications, chromosome duplications/losses, tetraploidization and hexaploidization, under the assumption that duplicated chromosomes share significantly large numbers of paralogues.” I think readers could benefit for a little more detail in their explanation of how duplications are differentiated from fissions or other events, and how/if the relative timing (or simultaneity) of

duplications is assessed in their reconstruction algorithm. These can probably be gleaned from the supplements but I don't think one can expect that the average reader will dig into the supplements.

- 7) Line 264 - "Although several recent studies supported the ancient origin of microchromosomes (for example, a comparison between the chicken and spotted gar genomes suggested that the origin of microchromosomes dates back to the ancestral bony vertebrate)," - perhaps the authors could reference more than one study for the sake of scholarship. I am also a bit concerned about the presentation in that the wording makes it sound like the origins of microchromosomes are currently in question, rather than this simply being a historically interesting discussion.
- 8) Line 279 - "the total length of segments originating from individual proto-gnathostome chromosomes is highly conserved in chicken, spotted gar and elephant shark, suggesting that the ancestral gnathostome already possessed the tiny microchromosomes and the large macrochromosomes" - the authors should be aware that this exact feature was highlighted in comparisons between chicken and gar in Braasch et al and perhaps acknowledge that they are confirming this observation.
- 9) Line 363 - "Indeed, the ratio of retained genes between the two subgenomes in the proto-gnathostome genome is 2.25, which is considerably larger than previously reported ratios of paleo-allopolyploids: 1.47 for Brassica, 1.46 for maize, 1.24 for sorghum, 1.17 for Arabidopsis and 1.35 for *Xenopus laevis*." Can the authors speculate why the protognathostome might have evolved so differently from all of the other allopolyploid examples provided, with on average ~4X higher rates of biased paralog loss? Seemingly this large difference is worth discussing. Can the authors estimate a similar rate for lamprey/cyclostomes under their preferred hypothesis(es)?

### **Minor/Optional suggestions**

- 10) I still do not like the use of the term "cyclostome" as presented in the paper since they use no data whatsoever from hagfish and it lends/justifies a biased interpretation to their results. If the authors address the above comments and still want to use the term it might be acceptable, but they should at least address the caveat that we don't have much information from hagfish yet.
- 11) The authors satisfactorily addressed my previous query about species trees with the revised analyses, although they may like to know that ENSEMBL trees are fit to a species tree in a way that will impinge on the signals that authors are interested in here. The methods have changed since publication of the original lamprey paper, so I sent an inquiry to ENSEMBL, here is their reply

Hi Jeremiah

I'm sorry for the delay in getting back to you. It involved a lot of digging through our code.

Treebest is still using a species tree to guide homology inference. Over the last 10 years what has changed is that our species tree reconstruction method has been improved via our species tree pipeline which integrates the NCBI taxonomy and mash distances between genomes calculated on the whole genome sequence. The tree we use is here:

[https://github.com/Ensembl/ensembl-compara/blob/release/103/conf/vertebrates/species\\_tree.branch\\_len.nw](https://github.com/Ensembl/ensembl-compara/blob/release/103/conf/vertebrates/species_tree.branch_len.nw)

All the best

- 12) It is difficult to understand the authors' reluctance to share comparative maps that anchor to defined gene names. While they assert that this is not common practice, my groups have routinely provided these as supplements (e.g. Smith et al 2018 ST3&5; Smith et al 2015 ST2&3). Ultimately this is a courtesy to the average reader who might care about the evolution of specific gene families or wish to delve into other details of the analyses presented, but I am happy to let the authors choose how to handle this.
- 13) The discussion on immune system evolution seems to be essentially a just-so story, which is OK, but perhaps they should also acknowledge that there are gaps to fill in the story. Only a suggestion.

Sincerely,

Jeremiah Smith

### **Point-by-point response to reviewer's comments**

We would like to thank all reviewers and the editor again for their time and effort in reviewing our manuscript and offering detailed and constructive suggestions. The following are point-by-point responses to the comments from Reviewer 2.

The clarity of the manuscript is much improved and I am glad to see that the authors seem to be interested in moving toward open source sharing of their program in line with modern reporting standards. I am also heartened to see that the authors have adopted a hypothesis testing framework that can be used to assess the validity of alternate models. I think there is room for expansion/modification of this test and a few additional points that should be addressed prior to publication. These are outlined in more detail below.

1) Code sharing - The authors should discuss this with the editor, ideally the code would be released on GitHub or similar, but it is stated that "the reconstruction software/code is available on request." due to apparent copyright issues. I looked at the link the authors sent and it seems like there are several solutions to release (<http://numerical.recipes/licenses/redistribute.html>), perhaps it can be better explained why this is not possible in this instance and why Netlib would not be a solution. In general, I am happy to defer to the editor here in determining the correct course of action here. We thank Reviewer 2 for this advice. We will consider using Netlib in the next version of the reconstruction program, and we will be mentioning this in our response to the editor.

2) Code sharing - I understand that the issue with DoveTail is problematic. In the cases that I am familiar with as a reviewer (Nature, NG, Genome research ..) or Author (one of the Nature Genetics articles cited in their letter) DoveTail data have been reanalyzed using another program or heavily vetted with an orthogonal method. Perhaps the editor could consult with Dr Henry Gee on policies related to non-open source assemblers. I understand there is likely little the authors can do themselves to resolve this issue so I do not anticipate an author response to this bullet.

No response required.

3) I applaud the authors for identifying a statistical test to assess alternatives to the hexaploidization and would strongly recommend that they expand the tests to consider a broader range of possibilities. In addition, the pattern of presumptive paralog retention in lampreys still needs some attention. Specifically, the chromosomes that retain zero (or close to zero) homologs with the presumptive pre-1R ancestor. I apologize for missing the table with these data in the earlier rebuttals, but did not find it in the previous supplement and the information was not integrated into the main text figure as requested. To make my concern a bit clearer, I am including a quick figure to illustrate the issue

(generated from their supplemental table).

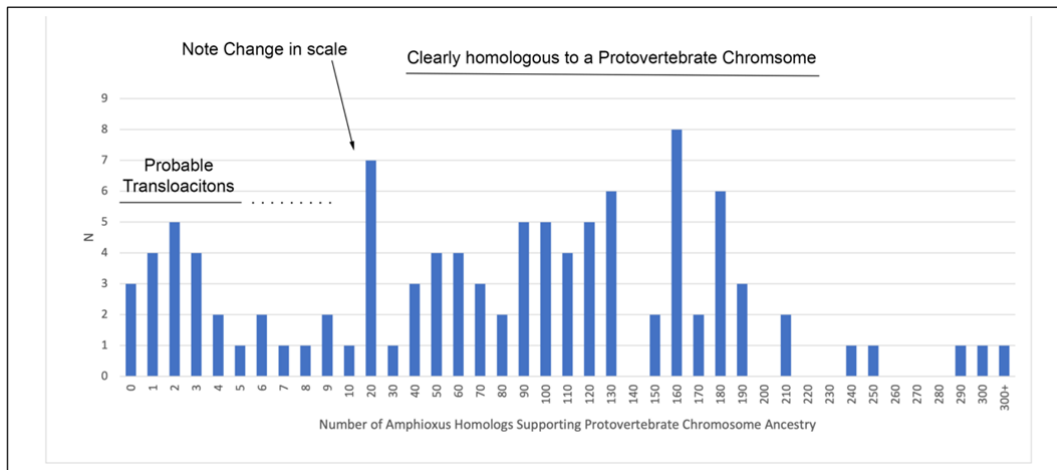

Specifically, many of the chromosomes annotated as duplicates of a PVC have very small numbers (even zero) of genes that are ohnologous to the reconstructed PVCs, at least as it can be understood in the context of amphioxus homologs (not to mention reciprocal zeros across lamprey segments). Notably, these form a distribution of homolog counts that appears to be distinct from the broader distribution (and does not include six missing chromosomes - or 11 if PVC18 is counted - marked with hashes in Figure 6). Considering the possibility that chromosomal segments with small numbers of homologs are the product of translocations or other small events, the observed deviation "D" as used in their statistical tests should probably be  $13+19=32$  if they wanted to perform a minimally conservative test and perhaps also the 5 missing PVG18 chromosomes ( $D=37$ ,  $K18$ ) if they wanted consider other conservative tests.

We thank Reviewer 2 for this analysis of small chromosomes. As Reviewer 2 discussed, there exist small segments that have only small numbers of orthologs or paralogs, and we agree that those small segments should be treated carefully. In our statistical analysis, we tested whether or not the proto-cyclostome genome was shaped by independent chromosome-number-increasing events. We described such chromosome-number-increasing events as "duplication" events, but it was just for simplifying the discussion. In fact, our probability model deals equally with all types of chromosome-number-increasing events, including duplications, fissions and translocations (if translocations increase the number of chromosomes). Therefore, our statistical test remains unchanged if some of the proto-cyclostome chromosomes were produced by fissions or translocations. In addition, we did not conclude that all proto-cyclostome chromosomes were created by polyploidization events: Some of them (the smaller chromosomes in particular) may be produced by fissions or translocations as Reviewer 2 discussed here.

Regarding Pvc18, we excluded it because it was left as a single proto-cyclostome chromosome due to the large number of lamprey segments. If we include it, we can calculate the

probability for Scenarios A (no WGDs) or D (chromosome-scale duplications followed by one WGD):  $p=0.0000000480$  for Scenario A and  $p=0.00000118$  for Scenario D. For other scenarios, we need to consider chromosome deletion events in addition to duplications, but our framework does not allow inclusion of deletions (see below for more discussion). To avoid this problem, we set  $Y_{18} = \max(1, N)$  for Scenarios B, C and E so that we can calculate the probability as in the case of  $K=17$ .

In the revised manuscript, we added the tests with  $K = 18$  and revised Methods, Supplementary Table 10 and the main text as follows.

“In addition, we evaluated the case of  $K = 18$  by setting  $Y_{18} = \max(1, N)$ , since our model requires  $Y_k \geq N$  for all  $k = 1, \dots, K$ ; we also evaluated the case of  $K = 5$ ,  $Y = 30$  and  $D = 0$  since larger proto-vertebrate chromosomes are more reliable in our reconstruction and the largest five proto-vertebrate chromosomes have multiplicity six.”

| Scenario | $K$ | $Y$ | $D$ | $N$ | $M$ | $P$          |
|----------|-----|-----|-----|-----|-----|--------------|
| A        | 17  | 103 | 13  | 1   | 6   | 0.0000000018 |
| B        | 17  | 103 | 13  | 2   | 6   | 0.0000030304 |
| C        | 17  | 103 | 13  | 4   | 6   | 0.0214209597 |
| D        | 17  | 49  | 6   | 1   | 3   | 0.0000002044 |
| E        | 17  | 49  | 6   | 2   | 3   | 0.0038115884 |
| A        | 18  | 104 | 18  | 1   | 6   | 0.0000000480 |
| B        | 18  | 105 | 17  | 2   | 6   | 0.0000371775 |
| C        | 18  | 107 | 15  | 4   | 6   | 0.0487599825 |
| D        | 18  | 50  | 8   | 1   | 3   | 0.0000011843 |
| E        | 18  | 51  | 7   | 2   | 3   | 0.0067631372 |
| A        | 5   | 30  | 0   | 1   | 6   | 0.0000421035 |
| B        | 5   | 30  | 0   | 2   | 6   | 0.0003120318 |
| C        | 5   | 30  | 0   | 4   | 6   | 0.0049925087 |
| D        | 5   | 15  | 0   | 1   | 3   | 0.0009990010 |
| E        | 5   | 15  | 0   | 2   | 3   | 0.0159840160 |

“In addition, we confirmed by statistical test (see Methods) that the observed peak of multiplicity (Fig. 3d) is unlikely to have been created by accumulation of chromosome-scale or segmental duplications after one ( $P < 4 \times 10^{-5}$ ) or two ( $P < 0.05$ ) tetraploidization events.”

We also revised an equation because it was written incorrectly in the previously submitted manuscript. We confirmed that the probability calculation was performed correctly using the correct equation below.

Wrong:  $S(Y_1, \dots, Y_K) = (Y_1, \dots, Y_K)! \prod_{k=1}^K \Gamma(Y_k) / \Gamma(X_k)$

Correct:  $S(Y_1, \dots, Y_K) = (Y_1 - X_1, \dots, Y_K - X_K)! \prod_{k=1}^K \Gamma(Y_k) / \Gamma(X_k)$

[The tests with  \$K=5\$  seem unjustifiably biased.](#)

The tests with  $K=5$  were shown because the largest five proto-vertebrate chromosomes are expected

to be more reliable than the other reconstructed chromosomes. In addition, larger chromosomes are especially informative for distinguishing polyploidy and aneuploidy than smaller chromosomes, because chromosome-scale duplication of a larger chromosome is more deleterious than duplication of a smaller chromosome with only a small number of genes as discussed in the germline sea lamprey genome paper [Smith et al. *Nat Genet* (2018)]. Besides, the information of the tests with  $K=5$  is helpful if someone wants to manually check the correctness of our probability calculation, because the case of  $K=5$  is easier to calculate than the other cases.

Furthermore, the authors should permit duplications to occur before, between and after WGDS in a single model, and/or groups of models.

As Reviewer 2 mentioned, we assumed in our analysis that chromosome-scale duplications occur mainly before, between, or after WGDs in a single model. We did not consider pre-1R chromosome-scale duplications because the proto-gnathostome genome shows that all chromosomes were quadrupled by two rounds of WGDs with no chromosome-scale duplication events (see Supplementary Figs. 6 and 9). For Scenarios D and E, we chose the numbers of chromosomes ( $Y_1, \dots, Y_{17}$ ) such that the number of chromosome-scale duplications is minimized after the last WGD (i.e., cyclostome-specific WGD). Therefore, our calculation of convergence probability should be a conservative estimate compared with the suggested models that allow chromosome-scale duplications after WGD.

Finally, in text reporting of p-values should include all hypotheses, not just a single test with a low p-value. It is not clear why the P reported in the main text was chosen versus say model C which is marginally rejected with  $D=13$ .

We chose Model B because (1) the choice of scenarios does not affect our conclusion, (2) Model B was proposed in the sea lamprey germline genome paper [Smith et al. *Nat Genet* (2018)], and (3) Reviewer 2 wrote “1R plus random duplication seems to be a better fit to the observed distribution than 1R+triplication,” in a previous review round.

In the revised manuscript, we revised the main text as follows.

“In addition, we confirmed by statistical test (see Methods) that the observed peak of multiplicity (Fig. 3d) is unlikely to have been created by accumulation of chromosome-scale or segmental duplications after one ( $P < 4 \times 10^{-5}$ ) or two ( $P < 0.05$ ) tetraploidization events.”

4) A similar test can and should be used to test for loss/degradation of chromosomes following their hexaploidization model. Although p-values cannot be directly compared to the above-mentioned tests, this would give the readers a better sense of the degree to which their model fits larger patterns observed in their data.

The strength of our analysis lies in the probability calculation without using the unknown rate of chromosome-scale duplications. On the other hand, if we allow loss of chromosomes in addition to duplications, we cannot calculate the convergence probability without knowing the rates of duplication and loss. Nevertheless, we speculate that the probability of staying close to multiplicity six after six-fold duplication should be larger than the probability of convergence to multiplicity six from lower multiplicity values, especially when nine out of 18 proto-vertebrate chromosomes have multiplicity six in the proto-cyclostome genome.

Although our framework cannot calculate the probability, our proto-cyclostome reconstruction provided genome-scale evidence of six-fold duplication for the first time, and our statistical analysis showed that the previous model is highly unlikely. Thus, we believe that our analysis already made a significant progress toward a better understanding of the origin of cyclostome genomes, considering the previous lack of ancestral genome reconstruction and rigorous statistical analysis.

Similar comparisons could also be performed on gnathostome duplications, though these might be difficult to execute given their reconstruction method.

Due to the chromosome fusion events between 1R and 2R, we cannot assume that the multiplicities of individual proto-vertebrate chromosomes increased independently. Therefore, our framework does not allow calculation of the convergence probability for the proto-gnathostome genome.

Nevertheless, it seems clear from our reconstruction and from previous reconstructions [Sacredot et al. *Genome Biol* (2018); Simakov et al. *Nat Ecol Evol* (2020)] that two WGD events occurred between the proto-vertebrate and the proto-gnathostome, and the two WGDs were separated by several chromosome fusion events as illustrated in Figure 6.

5) As part of their argument for downplaying non-WGD mechanisms in this manuscript, the authors state in their reply that "Since there is no such mechanism like whole-genome fission, we conclude that the proto-cyclostome genome was shaped by polyploidization". In conceptualizing the potential influence of fissions or other small events the authors should more carefully consider karyotype variation in mammals (for example <https://pubmed.ncbi.nlm.nih.gov/3073914/> and <https://pubmed.ncbi.nlm.nih.gov/15004472/> ) and the degree to which these mirror both aspects the lamprey karyotype (large numbers of small acrocentrics) and details of the author's reconstructions. We apologize for the careless argument in our previous response. It is indeed important to consider the possibility of karyotype reversal by Robertsonian fusions and centric fissions, but we concluded that it cannot explain the observed paralog distribution in the proto-cyclostome genome. The figure below shows the distribution of paralogs among proto-cyclostome chromosomes duplicated from Pvc1, Pvc10 and Pvc17. In this figure, we used paralogs identified with less stringent criteria so that



we can distinguish chromosome duplications and fissions. We see large numbers of paralogs between all pairs of reconstructed proto-cyclostome chromosomes below, and it is unlikely that these sextuple chromosomes were created by centric fission.

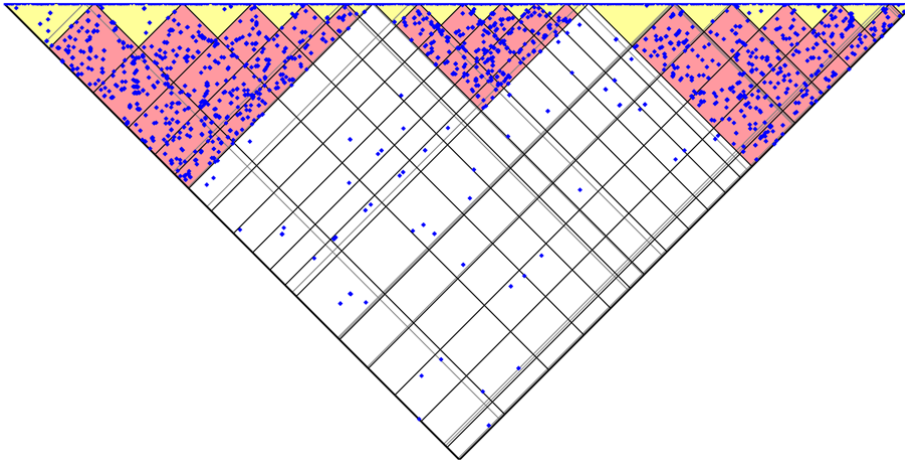

6) Line 189 - "Importantly, the algorithm explores all alternative models including segmental duplications, chromosome duplications/losses, tetraploidization and hexaploidization, under the assumption that duplicated chromosomes share significantly large numbers of paralogs." I think readers could benefit for a little more detail in their explanation of how duplications are differentiated from fissions or other events, and how/if the relative timing (or simultaneity) of duplications is assessed in their reconstruction algorithm. These can probably be gleaned from the supplements but I don't think one can expect that the average reader will dig into the supplements. We thank Reviewer 2 for this advice. We have now moved the description of reconstruction method from Supplementary Information to Methods in the main manuscript.

7) Line 264 - "Although several recent studies supported the ancient origin of microchromosomes (for example, a comparison between the chicken and spotted gar genomes suggested that the origin of microchromosomes dates back to the ancestral bony vertebrate)," - perhaps the authors could reference more than one study for the sake of scholarship.

We sincerely apologize that we forgot to cite one of the most important papers on the origin of microchromosomes [Voss et al. *Genome Res* (2011)], which was co-authored by Reviewer 2. We thank Reviewer 2 for letting us notice it.

We revised Supplementary Note 4 as follows.

"Recent studies tend to support this ancient-origins hypothesis: It was argued that many avian microchromosomes represent ancient chromosomes in the ancestral land vertebrate [Burt D.W.

*Cytogenet Genome Res* (2002)], and that many proto-gnathostome chromosomes are retained as microchromosomes in the chicken genome without inter-chromosomal rearrangements [Nakatani et al., *Genome Res* (2007)]. The strong conservation in gene content was confirmed in several studies [Voss et al. *Genome Res* (2011); Louis et al. *Brief Func Genomics* (2012); Uno et al. *PLoS ONE* (2012); Venkatesh et al. *Nature* (2014)], but little was known about the origin of chromosomal features that characterize avian microchromosomes (i.e. chromosome length, GC contents, etc). Comparative analysis between the spotted gar genome and chicken genome showed that the chromosomal features already presented in the common ancestor of bony-vertebrate [Braasch et al. *Nat Genet* (2016)], and our analysis with the chromosome-scale elephant shark genome showed that the origin dates back further to the proto-gnathostome, suggesting that those chromosomal features were likely to be associated with the subgenome fractionation after 2R.”

We revised the main text as follows.

“Although several recent studies supported the ancient origin of microchromosomes [Burt D.W. *Cytogenet Genome Res* (2002); Nakatani et al., *Genome Res* (2007); Voss et al. *Genome Res* (2011); Louis et al. *Brief Func Genomics* (2012); Uno et al. *PLoS ONE* (2012); Venkatesh et al. *Nature* (2014); Braasch et al. *Nat Genet* (2016)], it was still unknown ...”.

I am also a bit concerned about the presentation in that the wording makes it sound like the origins of microchromosomes are currently in question, rather than this simply being a historically interesting discussion.

It might be misleading to say that the origin of microchromosomes was just a historically interesting discussion: the argument/evidence that microchromosomes were derived from a subgenome in the proto-gnathostome genome appears only recently in [Simakov et al. *Nat Ecol Evol* (2020)] and in this manuscript.

In order to write a more accurate description of previous studies, we revised Supplementary Note 4 and added citations to several relevant papers (see above for the revised text in Supplementary Note 4).

8) Line 279 - "the total length of segments originating from individual proto-gnathostome chromosomes is highly conserved in chicken, spotted gar and elephant shark, suggesting that the ancestral gnathostome already possessed the tiny microchromosomes and the large macrochromosomes" - the authors should be aware that this exact feature was highlighted in comparisons between chicken and gar in Braasch et al and perhaps acknowledge that they are confirming this observation.

We apologize if the previous text gave an impression that we do not properly acknowledge the previous study by Braasch et al. We are aware of the paper as we explained in our previous response

comment (see [R2 Comment 07]). The major difference is that we reconstructed the proto-gnathostome chromosomes and we discussed chromosomal features in the proto-gnathostome genome (not the ancestral bony vertebrate), using the chromosome-scale elephant shark genome. Thus, our argument about chromosomal features of proto-gnathostome chromosomes is not just a confirmation, but we clarified this point by inserting a description of the work by Braasch et al. in the main text as follows.

“.., it was still unknown (1) if chromosomal features characteristic to modern avian microchromosomes (i.e. high GC-content, high gene density and high recombination rate) were already present in the ancestral gnathostome genome (cf. the chromosomal features were previously reported to be conserved between the spotted gar and chicken genomes [Braasch et al. *Nat Genet* (2016)], ...”

9) Line 363 - "Indeed, the ratio of retained genes between the two subgenomes in the proto-gnathostome genome is 2.25, which is considerably larger than previously reported ratios of paleo-allopolyploids: 1.47 for Brassica, 1.46 for maize, 1.24 for sorghum, 1.17 for Arabidopsis and 1.35 for *Xenopus laevis*." Can the authors speculate why the protognathostome might have evolved so differently from all of the other allopolyploid examples provided, with on average ~4X higher rates of biased paralog loss? Seemingly this large difference is worth discussing. Can the authors estimate a similar rate for lamprey/cyclostomes under their preferred hypothesis(es)?

We thank Reviewer 2 for this suggestion of an interesting analysis. We could speculate that the proto-gnathostome might have had a higher level of sequence divergence and expression bias between the subgenomes than in other allopolyploids, but it seems difficult to verify such speculations. Regarding the bias of gene retention rate in the proto-cyclostome genome, it is difficult to classify proto-cyclostome chromosomes into subgenomes. Therefore, we don't have good answers to these questions at present, although they are interesting questions.

#### Minor/Optional suggestions

10) I still do not like the use of the term "cyclostome" as presented in the paper since they use no data whatsoever from hagfish and it lends/justifies a biased interpretation to their results. If the authors address the above comments and still want to use the term it might be acceptable, but they should at least address the caveat that we don't have much information from hagfish yet.

Our analysis of lamprey paralogs (and human-lamprey orthologs) showed that there is no clear, genome-wide distinction between chromosome pairs duplicated by 1R and chromosome pairs duplicated by the later event that we call cyclostome-specific hexaploidization. This observation suggests that the later event occurred shortly after 1R, which is indeed cyclostome-specific.

In the revised manuscript, we added the following sentence in the legend of Figure 1, in

which cyclostome-specific duplication scenarios are described.

“It is presently considered that the hagfish and lamprey lineages share the same duplication history [Pascual-Anaya et al. *Nat Ecol Evol* (2018)], but this argument should eventually be confirmed by sequencing the hagfish genome.”

11) The authors satisfactorily addressed my previous query about species trees with the revised analyses, although they may like to know that ENSEMBL trees are fit to a species tree in a way that will impinge on the signals that authors are interested in here. The methods have changed since publication of the original lamprey paper, so I sent an inquiry to ENSEMBL, here is their reply

Hi Jeremiah

I'm sorry for the delay in getting back to you. It involved a lot of digging through our code.

Treebest is still using a species tree to guide homology inference. Over the last 10 years what has changed is that our species tree reconstruction method has been improved via our species tree pipeline which integrates the NCBI taxonomy and mash distances between genomes calculated on the whole genome sequence. The tree we use is here:

[https://github.com/Ensembl/ensembl-compara/blob/release/103/conf/vertebrates/species\\_tree.branch\\_len.nw](https://github.com/Ensembl/ensembl-compara/blob/release/103/conf/vertebrates/species_tree.branch_len.nw)

All the best

We thank Reviewer 2 for this information.

12) It is difficult to understand the authors' reluctance to share comparative maps that anchor to defined gene names. While they assert that this is not common practice, my groups have routinely provided these as supplements (e.g. Smith et al 2018 ST3&5; Smith et al 2015 ST2&3). Ultimately this is a courtesy to the average reader who might care about the evolution of specific gene families or wish to delve into other details of the analyses presented, but I am happy to let the authors choose how to handle this.

We had already provided such information in Supplementary Data 1. Our description of the Supplementary Data 1 might have been unclear, so we revised the text in the Data availability section and clarified that information on orthologs, paralogs and gene names in individual chromosomal segments are included in Supplementary Data 1.

13) The discussion on Immune system evolution seems to be essentially a just-so story, which is OK, but perhaps they should also acknowledge that there are gaps to fill in the story. Only a suggestion. We thank Reviewer 2 for this suggestion, and we apologize if our discussion was overly assertive. Our discussion shows how the previous hypotheses can be updated or revised based on our ancestral

genome reconstruction, and we do not think that the origin of adaptive immunity is resolved completely.

To address the concern raised by Reviewer 2, we deleted phrases about adaptive immunity from the concluding sentence in Abstract and concluding sentence of Discussion which now read as follows.

Abstract: “Thus, our reconstructions reveal the major evolutionary events and offer new insights into the origin and evolution of vertebrate genomes.”

Discussion: “The resulting model offers unique perspectives on the origin and evolution of vertebrate genomes.”

Minor revisions.

In addition to the revisions described above, we have edited the manuscript for fixing minor errors as follows.

1. The asterisk symbol was fixed in Figure 1.
2. A phrase about thin vertical lines was deleted in the legend of Figure 2, because thin vertical lines were already deleted in the figure.
3. Figure 6 was fixed because there was an unnecessary horizontal line at the bottom of the figure in the previously submitted manuscript.
4. Supplementary Table 9 was fixed, because we presented the updated table in our response to the previous comments from Reviewer 2 but the table was not updated in the previous manuscript.
5. Fonts in Supplementary Tables 11, 12 and 13 were updated (table contents are the same).
6. We added an explanation of  $S$  and  $G_S$  after Equation 1 in Methods for improved readability. We revised the name of Algorithm 1 as CVB0, following relevant papers on topic models.

We hope that our responses and revisions described above satisfactorily addressed all the concerns raised by Reviewer 2.

#### **References:**

- Braasch, I. et al. The spotted gar genome illuminates vertebrate evolution and facilitates human-teleost comparisons. *Nat Genet* **48**, 427–437 (2016).
- Burt, D. W. Origin and evolution of avian microchromosomes. *Cytogenet Genome Res* **96**, 97–112 (2002).
- Louis, A., Roest Crolius, H. & Robinson-Rechavi, M. How much does the amphioxus genome represent the ancestor of chordates? *Brief Func Genomics* **11**, 89–95 (2012).

- Nakatani, Y., Takeda, H., Kohara, Y. & Morishita, S. Reconstruction of the vertebrate ancestral genome reveals dynamic genome reorganization in early vertebrates. *Genome Res* **17**, 1254–1265 (2007).
- Pascual-Anaya, J. et al. Hagfish and lamprey Hox genes reveal conservation of temporal colinearity in vertebrates. *Nat Ecol Evol* **2**, 859–866 (2018).
- Sacerdot, C., Louis, A., Bon, C., Berthelot, C. & Roest Crolius, H. Chromosome evolution at the origin of the ancestral vertebrate genome. *Genome Biol* **19**, 166 (2018).
- Simakov, O. et al. Deeply conserved synteny resolves early events in vertebrate evolution. *Nat Ecol Evol* **4**, 820–830 (2020).
- Smith, J. J. et al. The sea lamprey germline genome provides insights into programmed genome rearrangement and vertebrate evolution. *Nat Genet* **50**, 270–277 (2018).
- Uno, Y. et al. Inference of the protokaryotypes of amniotes and tetrapods and the evolutionary processes of microchromosomes from comparative gene mapping. *PLoS ONE* **7**, e53027 (2012).
- Venkatesh, B. et al. Elephant shark genome provides unique insights into gnathostome evolution. *Nature* **505**, 174–179 (2014).
- Voss, S. R. et al. Origin of amphibian and avian chromosomes by fission, fusion, and retention of ancestral chromosomes. *Genome Res* **21**, 1306–1312 (2011).
